# Supplementary material
Source: ML conference proceedings conference paper supplement (https://openreview.net/forum?id=p0BwJk3R1p)
Supplement: supplementary_material [file attachment]

# Survey Questions

## Survey Section: LLM Usage

Q7: Do you do the following when conducting research?: **Using LLMs directly or LLM-enabled tools when information seeking or reading.** Please select all that apply.

- Yes, to discover papers to read
- Yes, to discover important topics or threads of research for literature review
- Yes, to generate summaries or explanations of papers or technical terms in papers
- Yes, to ask broad questions of the field such as current trends or important findings
- Yes, other
- No, I don't use LLMs for information-seeking or reading

Q26: When you are conducting research, how often do you do the following?: **Using LLMs directly or LLM-enabled tools when information seeking or reading.**

- Never
- Very Rarely
- Rarely
- Occasionally
- Frequently
- Very Frequently

Q27: Do you do the following when conducting research?: **You are writing in a text editor and the LLM is providing editing support.** Please select all that apply.

- Yes, to look up synonyms when I'm writing papers
- Yes, to rewrite text I've written to fix grammatical issues or awkward phrasings
- Yes, to support paper formatting (e.g., LaTeX, formatting tables or formulas)
- Yes, other
- No, I don't use LLMs for editing support when I am writing

Q78: When you are conducting research, how often do you do the following?: **You are writing in a text editor and the LLM is providing editing support.**

- Never
- Very Rarely
- Rarely
- Occasionally
- Frequently
- Very Frequently

Q79: Do you do the following when conducting research?: **You prompt with an idea and the LLM generates text that you then directly copy and paste into a text editor.** Please select all that apply.

- Yes, to shorten or summarize a long piece of text that I wrote
- Yes, to draft paragraphs from ideas or bullet points
- Yes, to rewrite my writing into a different style (e.g., more formal)
- Yes, other
- No, I don't use LLMs for directly writing text while I lead ideation

Q80: When you are conducting research, how often do you do the following?: **You prompt with an idea and the LLM generates text that you then directly copy and paste into a text editor.**

- Never
- Very Rarely
- Rarely
- Occasionally
- Frequently
- Very Frequently

Q81: Do you do the following when conducting research?: **Use LLMs directly or LLM-enabled tools to help you come up with ideas and framing.** Please select all that apply.

- Yes, to brainstorm research topics or questions to work on
- Yes, to come up with new ways to frame a paper, including titles and abstracts
- Yes, to get inspiration for methods or approaches to use for a given problem
- Yes, other
- No, I don't use LLMs for ideation and framing

Q82: When you are conducting research, how often do you do the following?: **Use LLMs directly or LLM-enabled tools to help you come up with ideas and framing.**

- Never
- Very Rarely
- Rarely
- Occasionally
- Frequently
- Very Frequently

Q85: Do you do the following when conducting research?: **Use LLMs directly or LLM-enabled tools to generate data. Please select all that apply.**

- Yes, to generate synthetic interviews and survey responses
- Yes, to automatically produce training labels given example data
- Yes, to automatically produce both training examples and labels
- Yes, other
- No, I don't use LLMs for data generation

Q86: When you are conducting research, how often do you do the following?: **Use LLMs directly or LLM-enabled tools to generate data.**

- Never
- Very Rarely
- Rarely
- Occasionally
- Frequently
- Very Frequently

Q83: Do you do the following when conducting research?: **Use LLMs directly or LLM-enabled tools for data cleaning, analysis, and reporting.** Please select all that apply.

- Yes, to clean and reformat datasets
- Yes, to conduct statistical reporting of quantitative data
- Yes, to conduct analysis and reporting of qualitative data (e.g., of participant interviews)
- Yes, to simulate human ratings of an existing dataset for evaluation (e.g., summarization quality)
- Yes, other
- No, I don't use LLMs for data cleaning, analysis, or reporting

Q84: When you are conducting research, how often do you do the following?: **Use LLMs directly or LLM-enabled tools for data cleaning, analysis, and reporting.**

- Never
- Very Rarely
- Rarely
- Occasionally
- Frequently
- Very Frequently

## Survey Section: Attitudes and Perceptions

Q88: How **useful/beneficial** do you find LLMs to be for conducting these tasks?

|                                                                                                             | Not at all useful | Slightly useful | Moderately useful | Very useful | Extremely useful | I have not use LLMs for this type of activity |
|-------------------------------------------------------------------------------------------------------------|-------------------|-----------------|-------------------|-------------|------------------|-----------------------------------------------|
| Information seeking or reading                                                                              |                   |                 |                   |             |                  |                                               |
| You are writing in a text editor and the LLM is providing editing support                                   |                   |                 |                   |             |                  |                                               |
| You prompt with an idea and the LLM generates text that you then directly copy and paste into a text editor |                   |                 |                   |             |                  |                                               |
| Help you come up with ideas and framing                                                                     |                   |                 |                   |             |                  |                                               |
| Generating data (e.g., training data or synthetic responses)                                                |                   |                 |                   |             |                  |                                               |
| Data cleaning, analysis, and reporting                                                                      |                   |                 |                   |             |                  |                                               |

Q89: How **risky** do you find LLMs to be for conducting these tasks, given current model performance issues, such as with hallucination and generating copyrighted text?

|                     | Not at all risky | Slightly risky | Moderately risky | Very risky | Extremely risky | Unsure / Don't Know |
|---------------------|------------------|----------------|------------------|------------|-----------------|---------------------|
| Information seeking |                  |                |                  |            |                 |                     |

|                                                                                                             |  |  |  |  |  |  |
|-------------------------------------------------------------------------------------------------------------|--|--|--|--|--|--|
| or reading                                                                                                  |  |  |  |  |  |  |
| You are writing in a text editor and the LLM is providing editing support                                   |  |  |  |  |  |  |
| You prompt with an idea and the LLM generates text that you then directly copy and paste into a text editor |  |  |  |  |  |  |
| Help you come up with ideas and framing                                                                     |  |  |  |  |  |  |
| Generating data (e.g., training data or synthetic responses)                                                |  |  |  |  |  |  |
| Data cleaning, analysis, and reporting                                                                      |  |  |  |  |  |  |

Q90: If future LLMs can prevent hallucinations and can always attributes any copyrighted text (if generated) to the original sources, how **ethically acceptable** do you find the use of LLMs for these kinds of tasks?

|                                                                           | Unacceptable | Somewhat unacceptable | Neutral | Somewhat acceptable | Acceptable | Unsure / Don't Know |
|---------------------------------------------------------------------------|--------------|-----------------------|---------|---------------------|------------|---------------------|
| Information seeking or reading                                            |              |                       |         |                     |            |                     |
| You are writing in a text editor and the LLM is providing editing support |              |                       |         |                     |            |                     |
| You prompt with an idea and the LLM generates text that you then          |              |                       |         |                     |            |                     |

|                                                              |  |  |  |  |  |  |
|--------------------------------------------------------------|--|--|--|--|--|--|
| directly copy and paste into a text editor                   |  |  |  |  |  |  |
| Help you come up with ideas and framing                      |  |  |  |  |  |  |
| Generating data (e.g., training data or synthetic responses) |  |  |  |  |  |  |
| Data cleaning, analysis, and reporting                       |  |  |  |  |  |  |

Q91: How **comfortable** would you be with sharing how you use LLMs for these kinds of tasks with your research peers (e.g., collaborators, other Ph.D. students, or faculties?)

|                                                                                                             | Uncomfortable | Somewhat uncomfortable | Neutral | Somewhat comfortable | Comfortable | Unsure / Don't Know |
|-------------------------------------------------------------------------------------------------------------|---------------|------------------------|---------|----------------------|-------------|---------------------|
| Information seeking or reading                                                                              |               |                        |         |                      |             |                     |
| You are writing in a text editor and the LLM is providing editing support                                   |               |                        |         |                      |             |                     |
| You prompt with an idea and the LLM generates text that you then directly copy and paste into a text editor |               |                        |         |                      |             |                     |
| Help you come up with ideas and framing                                                                     |               |                        |         |                      |             |                     |
| Generating data (e.g., training data or synthetic                                                           |               |                        |         |                      |             |                     |

|                                        |  |  |  |  |  |  |
|----------------------------------------|--|--|--|--|--|--|
| responses)                             |  |  |  |  |  |  |
| Data cleaning, analysis, and reporting |  |  |  |  |  |  |

Q92: How **comfortable** would you be with disclosing how you use LLMs for these kinds of tasks to paper reviewers?

|                                                                                                             | Uncomfortable | Somewhat uncomfortable | Neutral | Somewhat comfortable | Comfortable | Unsure / Don't Know |
|-------------------------------------------------------------------------------------------------------------|---------------|------------------------|---------|----------------------|-------------|---------------------|
| Information seeking or reading                                                                              |               |                        |         |                      |             |                     |
| You are writing in a text editor and the LLM is providing editing support                                   |               |                        |         |                      |             |                     |
| You prompt with an idea and the LLM generates text that you then directly copy and paste into a text editor |               |                        |         |                      |             |                     |
| Help you come up with ideas and framing                                                                     |               |                        |         |                      |             |                     |
| Generating data (e.g., training data or synthetic responses)                                                |               |                        |         |                      |             |                     |
| Data cleaning, analysis, and reporting                                                                      |               |                        |         |                      |             |                     |

## Survey Section: Broad Perceptions of LLM Usage

Q98: Would your perceptions of the benefits and risks of using LLMs be affected by whether the LLM is part of an open-source or non-profit entity versus a commercial corporation?

- Yes, my perceptions of the benefits and risks differ for LLMs from open-source and non-profit entities vs from commercial corporations
- No, my perceptions are the same

[Free text response below]

(continued) Why or why not? If your perceptions differ, how?

Given your ratings above on the benefits/usefulness of these different ways of using LLMs, can you explain what you see to be the main benefits/usefulness for the academic community and for you as a researcher? (optional)

Given your ratings above on the risks/ethical considerations of these different ways of using LLMs, can you explain what you see to be the main risks/ethical considerations for the academic community and for you as a researcher? (optional)

## Survey Section: Demographics

What field of research are you in? (e.g., Computer Science, Physics)

What subfield of research are you in? (e.g., Human-computer Interaction, Natural Language Processing, Fluid Mechanics)

Q1: What country do you primarily conduct research in? (Select from a drop-down list)

Q77: Do you identify as a native or bilingual English user?

- Yes
- No

Q93: What is your gender?

- Woman
- Man
- Non-binary
- Prefer not to disclose
- Prefer to self-describe: \_\_\_\_\_



Q95: What racial or ethnic groups best describe you?

- American Indian or Alaskan Native
- Asian
- Black or African American
- Hispanic and Latino
- White/Caucasian
- Middle Eastern
- Native Hawaiian or Pacific Islander
- Prefer not to disclose
- Prefer to self-describe:\_\_\_\_\_

Q71: What type of institution do you primarily conduct research in?

- University
- Commercial Company
- Non-profit
- Governmental
- I do not conduct research at a professional capacity
- Other (Please specify):\_\_\_\_\_

Q75: How many papers have you published?

- 0 and do not plan to publish
- 0 and plans to publish soon
- 1-5
- 6-10
- 11+

Q76: How many years have you been a researcher including both pre/post graduation?

- 0
- 1-3
- 4-6
- 7-10
- 11+
