# Supplementary material
Source: ML conference proceedings conference paper supplement (https://openreview.net/forum?id=p0BwJk3R1p)
Supplement: supplementary_material [file attachment]

## Sheet: Overall
Overview of the raw and processed survey results
Note: All free-text response questions and linkable personal data are removed from the results.
Note: To find the full survey question correponded to the question #, please refer to the survey questions list.
Column A to F	Survey Metadata, auto-collected
Column H to S	Survey Section: LLM Usage
Column U to AX	Survey Section: Attitudes and Perceptions
Column AZ	Survey Section: Broad Perceptions of LLM Usage
Column BB to BH	Survey Section: Demographic Groups
Column BJ to BO	Demographic groups after cleaning and categorizing (used for further statistical analysis)

## Sheet: Survey Results
StartDate	EndDate	Progress	Duration (in seconds)	Finished	RecordedDate		Q7	Q26	Q27	Q78	Q79	Q80	Q81	Q82	Q85	Q86	Q83	Q84		Q88_1	Q88_2	Q88_3	Q88_4	Q88_5	Q88_6	Q89_1	Q89_2	Q89_3	Q89_4	Q89_5	Q89_6	Q90_1	Q90_2	Q90_3	Q90_4	Q90_5	Q90_6	Q91_1	Q91_2	Q91_3	Q91_4	Q91_5	Q91_6	Q92_1	Q92_2	Q92_3	Q92_4	Q92_5	Q92_6
2023-11-17 0:48:46	2023-11-17 1:06:10	100	1043	TRUE	2023-11-17 1:06:11		No, I don't use LLMs for information seeking or reading	Never	Yes, to look up synonyms when I'm writing papers,Yes, to rewrite text I've written to fix grammatical issues or awkward phrasings,Yes, to support paper formatting (e.g., LaTeX, formatting tables or formulas),Yes, other:	Never	No, I don't use LLMs for directly writing text while I lead ideation	Never	No, I don't use LLMs for ideation and framing	Never	No, I don't use LLMs for data generation	Never	No, I don't use LLMs for data cleaning, analysis, or reporting	Never		Very useful	Extremely useful	I have not use LLMs for this type of activity	I have not use LLMs for this type of activity	I have not use LLMs for this type of activity	Not at all useful	Moderately Risky	Slightly Risky	Extremely Risky	Extremely Risky	Extremely Risky	Extremely Risky	Neutral	Somewhat Acceptable	Unacceptable	Unacceptable	Unacceptable	Unacceptable	Neutral	Somewhat comfortable	Uncomfortable	Uncomfortable	Uncomfortable	Uncomfortable	Comfortable	Comfortable	Uncomfortable	Uncomfortable	Uncomfortable	Uncomfortable
2023-11-14 21:21:58	2023-11-14 21:53:21	43	1882	FALSE	2023-11-21 21:54:26		No, I don't use LLMs for information seeking or reading	Occasionally	Yes, to look up synonyms when I'm writing papers,Yes, to rewrite text I've written to fix grammatical issues or awkward phrasings,Yes, to support paper formatting (e.g., LaTeX, formatting tables or formulas)	Frequently	No, I don't use LLMs for directly writing text while I lead ideation	Occasionally	Yes, to brainstorm research topics or questions to work on,Yes, to come up with new ways to frame a paper, including titles and abstracts,Yes, to get inspiration for methods or approaches to use for a given problem	Occasionally	No, I don't use LLMs for data generation	Occasionally	No, I don't use LLMs for data cleaning, analysis, or reporting	Never
2023-11-15 3:36:28	2023-11-15 4:33:43	100	3435	TRUE	2023-11-15 4:33:44		Yes, to generate summaries or explanations of papers or technical terms in papers,Yes, to ask broad questions of the field such as current trends or important findings	Frequently	Yes, to look up synonyms when I'm writing papers,Yes, to rewrite text I've written to fix grammatical issues or awkward phrasings,Yes, other:	Frequently	No, I don't use LLMs for directly writing text while I lead ideation	Never	Yes, to brainstorm research topics or questions to work on,Yes, to come up with new ways to frame a paper, including titles and abstracts,Yes, to get inspiration for methods or approaches to use for a given problem	Occasionally	No, I don't use LLMs for data generation	Never	No, I don't use LLMs for data cleaning, analysis, or reporting	Never		Extremely useful	Extremely useful	Not at all useful	Moderately useful	I have not use LLMs for this type of activity	Not at all useful	Not at all Risky	Not at all Risky	Extremely Risky	Slightly Risky	Unsure / Don't Know	Extremely Risky	Acceptable	Acceptable	Unacceptable	Acceptable	Unsure / Don't Know	Unacceptable	Comfortable	Comfortable	Uncomfortable	Comfortable	Comfortable	Uncomfortable	Somewhat uncomfortable	Somewhat uncomfortable	Uncomfortable	Somewhat uncomfortable	Unsure / Don't Know	Uncomfortable
2023-11-28 2:35:14	2023-11-28 3:44:19	100	4145	TRUE	2023-11-28 3:44:21		Yes, to ask broad questions of the field such as current trends or important findings,No, I don't use LLMs for information seeking or reading	Very Rarely	Yes, to look up synonyms when I'm writing papers,Yes, to support paper formatting (e.g., LaTeX, formatting tables or formulas)	Very Rarely	No, I don't use LLMs for directly writing text while I lead ideation	Never	Yes, to brainstorm research topics or questions to work on	Never	No, I don't use LLMs for data generation	Never	No, I don't use LLMs for data cleaning, analysis, or reporting	Never		Not at all useful	Slightly useful	Not at all useful	Slightly useful	Not at all useful	Not at all useful	Extremely Risky	Moderately Risky	Extremely Risky	Moderately Risky	Extremely Risky	Extremely Risky	Somewhat Acceptable	Somewhat Acceptable	Unacceptable	Neutral	Unacceptable	Unacceptable	Uncomfortable	Somewhat uncomfortable	Uncomfortable	Somewhat uncomfortable	Uncomfortable	Uncomfortable	Comfortable	Comfortable	Comfortable	Comfortable	Comfortable	Comfortable
2023-11-28 13:14:03	2023-11-28 13:26:26	100	743	TRUE	2023-11-28 13:26:27		Yes, to discover papers to read,Yes, to ask broad questions of the field such as current trends or important findings	Very Frequently	Yes, to look up synonyms when I'm writing papers,Yes, to rewrite text I've written to fix grammatical issues or awkward phrasings,Yes, to support paper formatting (e.g., LaTeX, formatting tables or formulas)	Very Frequently	Yes, to draft paragraphs from ideas or bullet points,Yes, to rewrite my writing into a different style (e.g., more formal)	Frequently	Yes, to brainstorm research topics or questions to work on	Very Rarely	Yes, to automatically produce training labels given example data,Yes, to automatically produce both training examples and labels	Very Rarely	Yes, to conduct analysis and reporting of qualitative data (e.g., of participant interviews),Yes, to simulate human ratings of an existing dataset for evaluation (e.g., summarization quality)	Frequently		Slightly useful	Slightly useful	Slightly useful	Not at all useful	Moderately useful	Slightly useful	Slightly Risky	Moderately Risky	Extremely Risky	Slightly Risky	Moderately Risky	Moderately Risky	Neutral	Acceptable	Somewhat Acceptable	Somewhat Unacceptable	Neutral	Acceptable	Neutral	Somewhat comfortable	Neutral	Uncomfortable	Comfortable	Comfortable	Neutral	Somewhat comfortable	Somewhat comfortable	Somewhat uncomfortable	Somewhat comfortable	Somewhat comfortable
2024-01-31 1:37:48	2024-01-31 2:04:43	100	1615	TRUE	2024-01-31 2:04:45		No, I don't use LLMs for information seeking or reading	Never	Yes, to rewrite text I've written to fix grammatical issues or awkward phrasings	Very Frequently	No, I don't use LLMs for directly writing text while I lead ideation	Never	No, I don't use LLMs for ideation and framing	Never	Yes, other:	Very Rarely	No, I don't use LLMs for data cleaning, analysis, or reporting	Never		I have not use LLMs for this type of activity	Extremely useful	I have not use LLMs for this type of activity	I have not use LLMs for this type of activity	Slightly useful	I have not use LLMs for this type of activity	Extremely Risky	Not at all Risky	Very Risky	Moderately Risky	Extremely Risky	Very Risky	Somewhat Acceptable	Acceptable	Somewhat Unacceptable	Neutral	Somewhat Unacceptable	Somewhat Unacceptable	Comfortable	Comfortable	Comfortable	Comfortable	Comfortable	Comfortable	Comfortable	Comfortable	Comfortable	Comfortable	Comfortable	Comfortable
2023-11-15 6:48:51	2023-11-15 7:03:43	100	891	TRUE	2023-11-15 7:03:44		No, I don't use LLMs for information seeking or reading	Never	Yes, to rewrite text I've written to fix grammatical issues or awkward phrasings,Yes, other:	Rarely	No, I don't use LLMs for directly writing text while I lead ideation	Never	Yes, to come up with new ways to frame a paper, including titles and abstracts	Occasionally	Yes, to automatically produce training labels given example data,Yes, to automatically produce both training examples and labels	Frequently	No, I don't use LLMs for data cleaning, analysis, or reporting	Never		Very useful	Extremely useful	Not at all useful	Moderately useful	Extremely useful	I have not use LLMs for this type of activity	Slightly Risky	Not at all Risky	Moderately Risky	Very Risky	Moderately Risky	Unsure / Don't Know	Acceptable	Acceptable	Somewhat Acceptable	Acceptable	Somewhat Acceptable	Unsure / Don't Know	Comfortable	Comfortable	Comfortable	Comfortable	Comfortable	Unsure / Don't Know	Comfortable	Comfortable	Comfortable	Comfortable	Comfortable	Unsure / Don't Know
2024-01-25 14:00:24	2024-01-25 14:12:04	100	700	TRUE	2024-01-25 14:12:05		Yes, to generate summaries or explanations of papers or technical terms in papers	Occasionally	Yes, to look up synonyms when I'm writing papers,Yes, to support paper formatting (e.g., LaTeX, formatting tables or formulas)	Frequently	No, I don't use LLMs for directly writing text while I lead ideation	Never	No, I don't use LLMs for ideation and framing	Never	No, I don't use LLMs for data generation	Never	No, I don't use LLMs for data cleaning, analysis, or reporting	Never		Very useful	Extremely useful	I have not use LLMs for this type of activity	I have not use LLMs for this type of activity	I have not use LLMs for this type of activity	I have not use LLMs for this type of activity	Slightly Risky	Not at all Risky	Slightly Risky	Very Risky	Extremely Risky	Very Risky	Acceptable	Acceptable	Neutral	Somewhat Unacceptable	Somewhat Unacceptable	Somewhat Unacceptable	Comfortable	Comfortable	Unsure / Don't Know	Unsure / Don't Know	Unsure / Don't Know	Unsure / Don't Know	Somewhat uncomfortable	Somewhat comfortable	Unsure / Don't Know	Unsure / Don't Know	Unsure / Don't Know	Unsure / Don't Know
2024-01-25 13:01:24	2024-01-25 13:07:44	100	380	TRUE	2024-01-25 13:07:45		Yes, to discover papers to read	Very Rarely	Yes, to look up synonyms when I'm writing papers,Yes, to rewrite text I've written to fix grammatical issues or awkward phrasings	Very Rarely	No, I don't use LLMs for directly writing text while I lead ideation	Never	No, I don't use LLMs for ideation and framing	Never	Yes, to generate synthetic interviews and survey responses	Occasionally	No, I don't use LLMs for data cleaning, analysis, or reporting	Never		Moderately useful	Slightly useful	Not at all useful	Not at all useful	Slightly useful	Not at all useful	Moderately Risky	Very Risky	Extremely Risky	Very Risky	Moderately Risky	Extremely Risky	Somewhat Acceptable	Somewhat Acceptable	Unacceptable	Neutral	Somewhat Acceptable	Neutral	Comfortable	Somewhat uncomfortable	Uncomfortable	Somewhat uncomfortable	Uncomfortable	Uncomfortable	Neutral	Somewhat uncomfortable	Uncomfortable	Uncomfortable	Uncomfortable	Uncomfortable
2024-01-24 19:59:55	2024-01-24 20:09:55	100	599	TRUE	2024-01-24 20:09:56		No, I don't use LLMs for information seeking or reading	Never	No, I don't use LLMs for editing support when I am writing	Never	No, I don't use LLMs for directly writing text while I lead ideation	Never	No, I don't use LLMs for ideation and framing	Never	No, I don't use LLMs for data generation	Never	No, I don't use LLMs for data cleaning, analysis, or reporting	Never		Not at all useful	I have not use LLMs for this type of activity	I have not use LLMs for this type of activity	I have not use LLMs for this type of activity	I have not use LLMs for this type of activity	I have not use LLMs for this type of activity	Very Risky	Moderately Risky	Extremely Risky	Very Risky	Moderately Risky	Extremely Risky	Acceptable	Acceptable	Unacceptable	Somewhat Acceptable	Neutral	Unacceptable	Somewhat comfortable	Comfortable	Uncomfortable	Somewhat uncomfortable	Neutral	Uncomfortable	Somewhat comfortable	Somewhat comfortable	Uncomfortable	Somewhat uncomfortable	Neutral	Uncomfortable
2024-01-25 13:16:28	2024-01-25 13:30:45	100	857	TRUE	2024-01-25 13:30:46		Yes, to discover important topics or threads of research for literature review,No, I don't use LLMs for information seeking or reading	Frequently	Yes, to support paper formatting (e.g., LaTeX, formatting tables or formulas)	Rarely	No, I don't use LLMs for directly writing text while I lead ideation	Very Rarely	No, I don't use LLMs for ideation and framing	Very Rarely	No, I don't use LLMs for data generation	Very Rarely	No, I don't use LLMs for data cleaning, analysis, or reporting	Very Rarely		Moderately useful	I have not use LLMs for this type of activity	Moderately useful	Slightly useful	I have not use LLMs for this type of activity	I have not use LLMs for this type of activity	Unsure / Don't Know	Extremely Risky	Unsure / Don't Know	Unsure / Don't Know	Unsure / Don't Know	Unsure / Don't Know	Unsure / Don't Know	Unsure / Don't Know	Unsure / Don't Know		Unsure / Don't Know	Unsure / Don't Know	Somewhat uncomfortable	Somewhat uncomfortable	Unsure / Don't Know	Unsure / Don't Know	Unsure / Don't Know	Unsure / Don't Know	Unsure / Don't Know	Unsure / Don't Know	Unsure / Don't Know	Unsure / Don't Know	Unsure / Don't Know	Unsure / Don't Know
2024-01-25 15:45:51	2024-01-25 15:51:20	57	329	FALSE	2024-02-01 15:51:22		No, I don't use LLMs for information seeking or reading	Never	No, I don't use LLMs for editing support when I am writing	Never	No, I don't use LLMs for directly writing text while I lead ideation	Never	No, I don't use LLMs for ideation and framing	Never	No, I don't use LLMs for data generation	Never	No, I don't use LLMs for data cleaning, analysis, or reporting	Never		Not at all useful	Not at all useful	Not at all useful	Not at all useful	Slightly useful	Not at all useful	Very Risky	Very Risky	Very Risky	Very Risky	Moderately Risky	Extremely Risky	Unacceptable	Neutral	Unacceptable	Neutral	Neutral	Unacceptable	Unsure / Don't Know	Unsure / Don't Know	Unsure / Don't Know	Unsure / Don't Know	Comfortable	Unsure / Don't Know	Unsure / Don't Know	Unsure / Don't Know	Unsure / Don't Know	Unsure / Don't Know	Comfortable	Unsure / Don't Know
2024-01-25 13:01:35	2024-01-25 13:12:54	100	678	TRUE	2024-01-25 13:12:55		Yes, to discover important topics or threads of research for literature review	Occasionally	Yes, to rewrite text I've written to fix grammatical issues or awkward phrasings	Rarely	No, I don't use LLMs for directly writing text while I lead ideation	Rarely	No, I don't use LLMs for ideation and framing	Rarely	No, I don't use LLMs for data generation	Very Rarely	Yes, to conduct analysis and reporting of qualitative data (e.g., of participant interviews)	Rarely		Moderately useful	Slightly useful	Not at all useful	Not at all useful	Slightly useful	Moderately useful	Extremely Risky	Slightly Risky	Unsure / Don't Know	Unsure / Don't Know	Moderately Risky	Extremely Risky	Somewhat Unacceptable	Somewhat Unacceptable	Unacceptable	Somewhat Unacceptable	Unacceptable	Somewhat Unacceptable	Uncomfortable	Somewhat uncomfortable	Uncomfortable	Uncomfortable	Somewhat uncomfortable	Somewhat uncomfortable	Uncomfortable		Uncomfortable	Uncomfortable	Somewhat uncomfortable	Uncomfortable
2024-01-26 3:32:32	2024-01-26 3:47:51	100	919	TRUE	2024-01-26 3:47:51		No, I don't use LLMs for information seeking or reading	Never	No, I don't use LLMs for editing support when I am writing	Never	No, I don't use LLMs for directly writing text while I lead ideation	Never	No, I don't use LLMs for ideation and framing	Never	No, I don't use LLMs for data generation	Never	No, I don't use LLMs for data cleaning, analysis, or reporting	Never		I have not use LLMs for this type of activity	I have not use LLMs for this type of activity	I have not use LLMs for this type of activity	I have not use LLMs for this type of activity	I have not use LLMs for this type of activity	I have not use LLMs for this type of activity							Somewhat Acceptable	Somewhat Acceptable	Unacceptable	Somewhat Unacceptable	Unacceptable	Unacceptable	Uncomfortable	Uncomfortable	Uncomfortable	Uncomfortable	Uncomfortable	Uncomfortable	Uncomfortable	Uncomfortable	Uncomfortable	Uncomfortable	Uncomfortable	Uncomfortable
2024-01-25 14:54:11	2024-01-25 15:03:51	100	579	TRUE	2024-01-25 15:03:52		No, I don't use LLMs for information seeking or reading	Very Rarely	Yes, to rewrite text I've written to fix grammatical issues or awkward phrasings	Occasionally	No, I don't use LLMs for directly writing text while I lead ideation	Never	No, I don't use LLMs for ideation and framing	Never	No, I don't use LLMs for data generation	Never	No, I don't use LLMs for data cleaning, analysis, or reporting	Never		Slightly useful	Very useful	Not at all useful	Not at all useful	Not at all useful	Slightly useful	Extremely Risky	Extremely Risky	Extremely Risky	Very Risky	Extremely Risky	Very Risky	Somewhat Unacceptable	Unacceptable	Unacceptable	Somewhat Unacceptable	Unacceptable	Somewhat Unacceptable	Somewhat comfortable	Unsure / Don't Know	Unsure / Don't Know	Unsure / Don't Know	Unsure / Don't Know	Unsure / Don't Know	Neutral	Neutral	Neutral	Neutral	Neutral	Neutral
2024-01-25 13:44:43	2024-01-25 16:14:11	97	8968	FALSE	2024-02-01 16:14:18		No, I don't use LLMs for information seeking or reading	Never	No, I don't use LLMs for editing support when I am writing	Never	No, I don't use LLMs for directly writing text while I lead ideation	Very Rarely	Yes, to come up with new ways to frame a paper, including titles and abstracts	Never	Yes, to automatically produce both training examples and labels	Occasionally	Yes, to conduct analysis and reporting of qualitative data (e.g., of participant interviews)	Rarely		I have not use LLMs for this type of activity	I have not use LLMs for this type of activity	I have not use LLMs for this type of activity	I have not use LLMs for this type of activity	I have not use LLMs for this type of activity	I have not use LLMs for this type of activity	Unsure / Don't Know	Unsure / Don't Know	Unsure / Don't Know	Unsure / Don't Know	Unsure / Don't Know	Unsure / Don't Know	Unsure / Don't Know	Unsure / Don't Know	Unsure / Don't Know	Unsure / Don't Know	Unsure / Don't Know	Unsure / Don't Know	Unsure / Don't Know	Unsure / Don't Know	Unsure / Don't Know	Unsure / Don't Know	Unsure / Don't Know	Unsure / Don't Know	Unsure / Don't Know	Unsure / Don't Know	Unsure / Don't Know	Unsure / Don't Know	Unsure / Don't Know	Unsure / Don't Know
2024-01-25 13:17:50	2024-01-25 13:31:40	100	830	TRUE	2024-01-25 13:31:41		Yes, to discover papers to read,Yes, to discover important topics or threads of research for literature review,Yes, to generate summaries or explanations of papers or technical terms in papers,Yes, to ask broad questions of the field such as current trends or important findings	Occasionally	Yes, to look up synonyms when I'm writing papers,Yes, to rewrite text I've written to fix grammatical issues or awkward phrasings,Yes, other:	Never	Yes, to shorten or summarize a long piece of text that I wrote,Yes, to draft paragraphs from ideas or bullet points,Yes, to rewrite my writing into a different style (e.g., more formal)	Very Rarely	Yes, to brainstorm research topics or questions to work on,Yes, to come up with new ways to frame a paper, including titles and abstracts,Yes, to get inspiration for methods or approaches to use for a given problem	Very Rarely	No, I don't use LLMs for data generation	Never	No, I don't use LLMs for data cleaning, analysis, or reporting	Never		Slightly useful	I have not use LLMs for this type of activity	I have not use LLMs for this type of activity	Slightly useful	I have not use LLMs for this type of activity	I have not use LLMs for this type of activity	Not at all Risky	Slightly Risky	Slightly Risky	Not at all Risky	Moderately Risky	Moderately Risky	Acceptable	Acceptable	Acceptable	Acceptable	Acceptable	Acceptable	Comfortable	Somewhat comfortable	Somewhat comfortable	Somewhat comfortable	Somewhat uncomfortable	Comfortable	Somewhat uncomfortable	Uncomfortable	Uncomfortable	Uncomfortable	Uncomfortable	Somewhat uncomfortable
2024-01-25 11:04:27	2024-01-25 11:12:55	57	508	FALSE	2024-02-01 11:13:00		Yes, to ask broad questions of the field such as current trends or important findings	Frequently	Yes, to look up synonyms when I'm writing papers	Occasionally	Yes, other:	Very Rarely	Yes, to come up with new ways to frame a paper, including titles and abstracts	Occasionally	No, I don't use LLMs for data generation	Never	No, I don't use LLMs for data cleaning, analysis, or reporting	Never		Moderately useful	Very useful	Slightly useful	Very useful	Not at all useful	Not at all useful	Very Risky	Slightly Risky	Extremely Risky	Unsure / Don't Know	Extremely Risky	Extremely Risky	Acceptable	Somewhat Acceptable	Unacceptable	Acceptable	Unacceptable	Neutral	Comfortable	Comfortable	Uncomfortable	Comfortable	Uncomfortable	Neutral	Comfortable	Comfortable	Uncomfortable	Comfortable	Uncomfortable	Somewhat uncomfortable
2024-02-12 10:16:32	2024-02-12 10:30:08	100	816	TRUE	2024-02-12 10:30:09		Yes, to discover papers to read,Yes, to generate summaries or explanations of papers or technical terms in papers,Yes, to ask broad questions of the field such as current trends or important findings	Frequently	No, I don't use LLMs for editing support when I am writing	Occasionally	No, I don't use LLMs for directly writing text while I lead ideation	Never	Yes, to brainstorm research topics or questions to work on,Yes, to get inspiration for methods or approaches to use for a given problem	Rarely	No, I don't use LLMs for data generation	Never	No, I don't use LLMs for data cleaning, analysis, or reporting	Never		Extremely useful	Moderately useful	I have not use LLMs for this type of activity	Slightly useful	I have not use LLMs for this type of activity	I have not use LLMs for this type of activity	Slightly Risky	Slightly Risky	Very Risky	Slightly Risky	Unsure / Don't Know	Unsure / Don't Know	Acceptable	Acceptable	Neutral	Acceptable	Unsure / Don't Know	Unsure / Don't Know	Comfortable	Comfortable	Comfortable	Comfortable	Unsure / Don't Know	Unsure / Don't Know	Comfortable	Comfortable	Neutral	Comfortable	Unsure / Don't Know	Unsure / Don't Know
2024-01-25 13:40:27	2024-01-25 13:46:45	100	378	TRUE	2024-01-25 13:46:46		No, I don't use LLMs for information seeking or reading	Never	No, I don't use LLMs for editing support when I am writing	Never	No, I don't use LLMs for directly writing text while I lead ideation	Never	No, I don't use LLMs for ideation and framing	Never	No, I don't use LLMs for data generation	Never	No, I don't use LLMs for data cleaning, analysis, or reporting	Never		Slightly useful	Slightly useful	Not at all useful	Not at all useful	Not at all useful	Not at all useful	Extremely Risky	Moderately Risky	Extremely Risky	Moderately Risky	Extremely Risky	Extremely Risky	Acceptable	Acceptable	Unacceptable	Neutral	Unacceptable	Acceptable	Comfortable	Comfortable	Unsure / Don't Know	Unsure / Don't Know	Unsure / Don't Know	Unsure / Don't Know	Unsure / Don't Know	Unsure / Don't Know	Unsure / Don't Know	Unsure / Don't Know	Unsure / Don't Know	Unsure / Don't Know
2023-11-28 8:59:37	2023-11-28 9:08:13	100	515	TRUE	2023-11-28 9:08:14		No, I don't use LLMs for information seeking or reading	Never	No, I don't use LLMs for editing support when I am writing	Very Rarely	Yes, to draft paragraphs from ideas or bullet points	Occasionally	Yes, to come up with new ways to frame a paper, including titles and abstracts	Occasionally	Yes, to automatically produce training labels given example data	Occasionally	Yes, to conduct statistical reporting of quantitative data	Very Rarely		Very useful	Very useful	Slightly useful	Slightly useful	Very useful	Slightly useful	Slightly Risky	Moderately Risky	Slightly Risky	Very Risky	Extremely Risky	Not at all Risky	Somewhat Acceptable	Somewhat Acceptable	Somewhat Unacceptable	Somewhat Acceptable		Acceptable	Somewhat comfortable	Somewhat comfortable		Comfortable	Comfortable	Unsure / Don't Know		Somewhat uncomfortable	Comfortable	Neutral	Somewhat uncomfortable	Somewhat comfortable
2024-01-25 7:59:50	2024-01-25 8:12:06	100	736	TRUE	2024-01-25 8:12:07		No, I don't use LLMs for information seeking or reading	Never	No, I don't use LLMs for editing support when I am writing	Never	No, I don't use LLMs for directly writing text while I lead ideation	Never	No, I don't use LLMs for ideation and framing	Never	Yes, other:,No, I don't use LLMs for data generation	Very Rarely	No, I don't use LLMs for data cleaning, analysis, or reporting	Never		I have not use LLMs for this type of activity	I have not use LLMs for this type of activity	I have not use LLMs for this type of activity	I have not use LLMs for this type of activity	I have not use LLMs for this type of activity	I have not use LLMs for this type of activity	Extremely Risky	Slightly Risky	Extremely Risky	Extremely Risky	Slightly Risky	Moderately Risky	Somewhat Acceptable	Acceptable	Unacceptable	Somewhat Unacceptable	Acceptable	Unacceptable	Comfortable	Comfortable	Comfortable	Comfortable	Comfortable	Comfortable	Comfortable	Comfortable	Comfortable	Comfortable	Comfortable	Comfortable
2024-01-25 12:55:26	2024-01-25 14:45:04	100	6578	TRUE	2024-01-25 14:45:05		No, I don't use LLMs for information seeking or reading	Very Rarely	No, I don't use LLMs for editing support when I am writing	Never	No, I don't use LLMs for directly writing text while I lead ideation	Never	No, I don't use LLMs for ideation and framing	Never	No, I don't use LLMs for data generation	Never	No, I don't use LLMs for data cleaning, analysis, or reporting	Never		Not at all useful	Not at all useful	Not at all useful	Not at all useful	Not at all useful	Not at all useful	Very Risky	Moderately Risky	Extremely Risky	Moderately Risky	Extremely Risky	Extremely Risky	Somewhat Unacceptable	Neutral	Unacceptable	Neutral	Somewhat Unacceptable	Neutral	Neutral	Neutral	Uncomfortable	Somewhat uncomfortable	Neutral	Neutral	Neutral	Neutral	Uncomfortable	Somewhat uncomfortable	Neutral	Neutral
2023-11-28 6:53:50	2023-11-28 7:23:21	100	1771	TRUE	2023-11-28 7:23:23		Yes, to discover papers to read,Yes, to generate summaries or explanations of papers or technical terms in papers	Frequently	No, I don't use LLMs for editing support when I am writing	Never	No, I don't use LLMs for directly writing text while I lead ideation	Never	Yes, to get inspiration for methods or approaches to use for a given problem	Occasionally	No, I don't use LLMs for data generation	Never	No, I don't use LLMs for data cleaning, analysis, or reporting	Never		Very useful	Moderately useful	Not at all useful	Moderately useful	Slightly useful	Slightly useful	Slightly Risky	Not at all Risky	Unsure / Don't Know	Slightly Risky	Unsure / Don't Know	Unsure / Don't Know	Acceptable	Somewhat Acceptable	Unacceptable	Acceptable	Unsure / Don't Know	Unsure / Don't Know	Comfortable	Comfortable	Uncomfortable	Comfortable	Unsure / Don't Know	Unsure / Don't Know	Comfortable	Comfortable	Uncomfortable	Comfortable	Unsure / Don't Know	Unsure / Don't Know
2024-01-25 12:54:48	2024-01-25 14:52:55	100	7086	TRUE	2024-01-25 14:52:55		Yes, to discover papers to read,Yes, to discover important topics or threads of research for literature review	Rarely	Yes, other:	Very Rarely	No, I don't use LLMs for directly writing text while I lead ideation	Never	No, I don't use LLMs for ideation and framing	Never	No, I don't use LLMs for data generation	Never	No, I don't use LLMs for data cleaning, analysis, or reporting	Never		Moderately useful	Very useful	Slightly useful	Not at all useful	Slightly useful	Slightly useful	Unsure / Don't Know	Moderately Risky	Extremely Risky	Very Risky	Moderately Risky	Moderately Risky	Somewhat Acceptable	Somewhat Acceptable	Neutral	Somewhat Unacceptable	Unacceptable	Somewhat Unacceptable	Somewhat comfortable	Neutral	Uncomfortable	Uncomfortable	Uncomfortable	Uncomfortable	Somewhat comfortable	Somewhat comfortable	Uncomfortable	Uncomfortable	Uncomfortable	Uncomfortable
2023-11-15 12:58:10	2023-11-15 13:10:00	100	710	TRUE	2023-11-15 13:10:01		Yes, to discover papers to read	Very Frequently	Yes, to look up synonyms when I'm writing papers	Very Frequently	Yes, to shorten or summarize a long piece of text that I wrote	Very Frequently	Yes, to brainstorm research topics or questions to work on	Very Frequently	Yes, to generate synthetic interviews and survey responses	Frequently	Yes, to clean and reformat datasets	Very Frequently		Extremely useful	Very useful	Very useful	Very useful	Extremely useful	Extremely useful	Not at all Risky	Not at all Risky	Slightly Risky	Not at all Risky	Not at all Risky	Not at all Risky	Acceptable	Acceptable	Acceptable	Acceptable	Acceptable	Acceptable	Comfortable	Comfortable	Comfortable	Comfortable	Comfortable	Comfortable	Comfortable	Comfortable	Comfortable	Comfortable	Comfortable	Comfortable
2024-01-30 0:39:31	2024-01-30 0:53:49	100	858	TRUE	2024-01-30 0:53:50		No, I don't use LLMs for information seeking or reading	Occasionally	Yes, to look up synonyms when I'm writing papers,Yes, to rewrite text I've written to fix grammatical issues or awkward phrasings	Occasionally	No, I don't use LLMs for directly writing text while I lead ideation	Never	No, I don't use LLMs for ideation and framing	Never	Yes, other:	Very Rarely	No, I don't use LLMs for data cleaning, analysis, or reporting	Never		Very useful	Very useful	Slightly useful	Not at all useful	Moderately useful	Not at all useful	Very Risky	Slightly Risky	Very Risky	Very Risky	Moderately Risky	Very Risky	Acceptable	Acceptable	Somewhat Acceptable	Somewhat Acceptable	Neutral	Somewhat Acceptable	Somewhat comfortable	Somewhat comfortable	Somewhat comfortable	Somewhat comfortable	Somewhat comfortable	Somewhat comfortable	Comfortable	Comfortable	Comfortable	Comfortable	Comfortable	Comfortable
2024-01-25 3:49:56	2024-01-25 3:59:49	100	593	TRUE	2024-01-25 3:59:50		Yes, to generate summaries or explanations of papers or technical terms in papers,Yes, to ask broad questions of the field such as current trends or important findings,Yes, other:	Occasionally	Yes, to look up synonyms when I'm writing papers,Yes, to rewrite text I've written to fix grammatical issues or awkward phrasings,Yes, to support paper formatting (e.g., LaTeX, formatting tables or formulas)	Occasionally	Yes, to shorten or summarize a long piece of text that I wrote,Yes, to draft paragraphs from ideas or bullet points,Yes, to rewrite my writing into a different style (e.g., more formal),Yes, other:	Occasionally	Yes, to brainstorm research topics or questions to work on,Yes, to come up with new ways to frame a paper, including titles and abstracts,Yes, to get inspiration for methods or approaches to use for a given problem	Occasionally	No, I don't use LLMs for data generation	Never	Yes, to conduct analysis and reporting of qualitative data (e.g., of participant interviews),Yes, other:	Occasionally		Slightly useful	Very useful	Very useful	Moderately useful	I have not use LLMs for this type of activity	Very useful	Extremely Risky	Not at all Risky	Not at all Risky	Not at all Risky	Unsure / Don't Know	Not at all Risky	Unsure / Don't Know	Unsure / Don't Know	Unsure / Don't Know	Unsure / Don't Know	Unsure / Don't Know	Unsure / Don't Know	Comfortable	Comfortable	Comfortable	Comfortable	Unsure / Don't Know	Comfortable	Comfortable	Comfortable	Comfortable	Comfortable	Unsure / Don't Know	Comfortable
2023-11-30 16:27:58	2023-11-30 16:33:13	43	315	FALSE	2023-12-07 16:33:17		Yes, to discover important topics or threads of research for literature review	Frequently	Yes, to rewrite text I've written to fix grammatical issues or awkward phrasings	Occasionally	Yes, to draft paragraphs from ideas or bullet points,Yes, to rewrite my writing into a different style (e.g., more formal)	Occasionally	Yes, to brainstorm research topics or questions to work on	Occasionally	No, I don't use LLMs for data generation	Very Rarely	No, I don't use LLMs for data cleaning, analysis, or reporting	Very Rarely
2023-11-15 14:21:54	2023-11-15 14:27:31	100	336	TRUE	2023-11-15 14:27:32		Yes, to ask broad questions of the field such as current trends or important findings	Occasionally	Yes, to support paper formatting (e.g., LaTeX, formatting tables or formulas)	Rarely	No, I don't use LLMs for directly writing text while I lead ideation	Never	Yes, other:	Rarely	Yes, to generate synthetic interviews and survey responses,Yes, to automatically produce both training examples and labels,Yes, other:	Frequently	Yes, to clean and reformat datasets	Occasionally		Slightly useful	Slightly useful	Slightly useful	Slightly useful	Very useful	Very useful	Slightly Risky	Unsure / Don't Know	Unsure / Don't Know	Unsure / Don't Know	Not at all Risky	Slightly Risky	Acceptable	Somewhat Acceptable	Somewhat Acceptable	Somewhat Acceptable	Acceptable	Acceptable	Neutral	Neutral	Neutral	Neutral	Comfortable	Comfortable	Comfortable	Comfortable	Comfortable	Comfortable	Comfortable	Comfortable
2023-11-15 12:37:23	2023-11-15 12:54:09	100	1006	TRUE	2023-11-15 12:54:10		Yes, to discover papers to read,Yes, to discover important topics or threads of research for literature review,Yes, to generate summaries or explanations of papers or technical terms in papers	Frequently	Yes, to look up synonyms when I'm writing papers,Yes, to rewrite text I've written to fix grammatical issues or awkward phrasings	Occasionally	Yes, to shorten or summarize a long piece of text that I wrote,Yes, to draft paragraphs from ideas or bullet points	Very Rarely	Yes, to brainstorm research topics or questions to work on	Occasionally	No, I don't use LLMs for data generation	Very Rarely	Yes, to clean and reformat datasets,Yes, to conduct statistical reporting of quantitative data,Yes, to simulate human ratings of an existing dataset for evaluation (e.g., summarization quality)	Occasionally		Extremely useful	Very useful	Not at all useful	Very useful	Moderately useful	Extremely useful	Not at all Risky	Very Risky	Extremely Risky	Not at all Risky	Moderately Risky	Slightly Risky	Acceptable	Neutral	Unacceptable	Neutral	Somewhat Unacceptable	Somewhat Unacceptable	Comfortable	Comfortable	Uncomfortable	Neutral	Neutral	Comfortable	Comfortable	Comfortable	Neutral	Somewhat comfortable	Somewhat comfortable	Comfortable
2024-01-26 4:51:52	2024-01-26 5:28:53	100	2220	TRUE	2024-01-26 5:28:54		No, I don't use LLMs for information seeking or reading	Never	No, I don't use LLMs for editing support when I am writing	Never	No, I don't use LLMs for directly writing text while I lead ideation	Never	No, I don't use LLMs for ideation and framing	Never	No, I don't use LLMs for data generation	Never	No, I don't use LLMs for data cleaning, analysis, or reporting	Never		I have not use LLMs for this type of activity	I have not use LLMs for this type of activity	I have not use LLMs for this type of activity	I have not use LLMs for this type of activity	I have not use LLMs for this type of activity	I have not use LLMs for this type of activity	Unsure / Don't Know	Unsure / Don't Know	Unsure / Don't Know	Unsure / Don't Know	Unsure / Don't Know	Unsure / Don't Know	Acceptable	Acceptable	Somewhat Unacceptable	Acceptable	Acceptable	Acceptable	Comfortable	Comfortable	Comfortable	Comfortable	Comfortable	Comfortable	Comfortable	Comfortable	Comfortable	Comfortable	Comfortable	Comfortable
2024-01-25 4:47:07	2024-01-25 4:59:20	100	732	TRUE	2024-01-25 4:59:21		No, I don't use LLMs for information seeking or reading	Never	No, I don't use LLMs for editing support when I am writing	Never	No, I don't use LLMs for directly writing text while I lead ideation	Never	No, I don't use LLMs for ideation and framing	Never	No, I don't use LLMs for data generation	Never	No, I don't use LLMs for data cleaning, analysis, or reporting	Never		I have not use LLMs for this type of activity	I have not use LLMs for this type of activity	I have not use LLMs for this type of activity	I have not use LLMs for this type of activity	I have not use LLMs for this type of activity	I have not use LLMs for this type of activity	Not at all Risky	Slightly Risky	Moderately Risky	Not at all Risky	Extremely Risky	Extremely Risky	Acceptable	Somewhat Acceptable	Somewhat Unacceptable	Acceptable	Unacceptable	Unacceptable	Unsure / Don't Know	Unsure / Don't Know	Unsure / Don't Know	Unsure / Don't Know	Unsure / Don't Know	Unsure / Don't Know	Unsure / Don't Know	Unsure / Don't Know	Unsure / Don't Know	Unsure / Don't Know	Unsure / Don't Know	Unsure / Don't Know
2023-11-28 0:59:30	2023-11-28 1:10:16	100	646	TRUE	2023-11-28 1:10:17		Yes, to generate summaries or explanations of papers or technical terms in papers	Occasionally	Yes, to support paper formatting (e.g., LaTeX, formatting tables or formulas)	Rarely	Yes, to rewrite my writing into a different style (e.g., more formal)	Occasionally	Yes, to get inspiration for methods or approaches to use for a given problem	Occasionally	Yes, to automatically produce both training examples and labels	Occasionally	Yes, to conduct analysis and reporting of qualitative data (e.g., of participant interviews)	Occasionally		Very useful	Slightly useful	Moderately useful	Moderately useful	Extremely useful	Extremely useful	Slightly Risky	Slightly Risky	Moderately Risky	Moderately Risky	Slightly Risky	Very Risky	Neutral	Neutral	Neutral	Neutral	Neutral	Neutral	Somewhat uncomfortable	Neutral	Neutral	Somewhat uncomfortable	Neutral	Neutral	Neutral	Somewhat uncomfortable	Neutral	Somewhat comfortable	Neutral	Neutral
2024-01-25 4:48:16	2024-01-25 5:03:01	100	884	TRUE	2024-01-25 5:03:02		Yes, to generate summaries or explanations of papers or technical terms in papers	Occasionally	Yes, to rewrite text I've written to fix grammatical issues or awkward phrasings	Occasionally	No, I don't use LLMs for directly writing text while I lead ideation	Never	No, I don't use LLMs for ideation and framing	Never	No, I don't use LLMs for data generation	Rarely	No, I don't use LLMs for data cleaning, analysis, or reporting	Never		Slightly useful	Very useful	I have not use LLMs for this type of activity	I have not use LLMs for this type of activity	Slightly useful	I have not use LLMs for this type of activity	Moderately Risky	Slightly Risky	Extremely Risky	Very Risky	Slightly Risky	Slightly Risky	Acceptable	Acceptable	Acceptable	Acceptable	Acceptable	Acceptable	Comfortable	Comfortable	Unsure / Don't Know	Unsure / Don't Know	Comfortable	Comfortable	Comfortable	Comfortable	Unsure / Don't Know	Unsure / Don't Know	Comfortable	Comfortable
2023-11-15 0:03:36	2023-11-15 0:41:53	100	2297	TRUE	2023-11-15 0:41:54		Yes, to generate summaries or explanations of papers or technical terms in papers	Frequently	Yes, to rewrite text I've written to fix grammatical issues or awkward phrasings	Frequently	Yes, to draft paragraphs from ideas or bullet points	Frequently	Yes, to brainstorm research topics or questions to work on	Occasionally	No, I don't use LLMs for data generation	Never	No, I don't use LLMs for data cleaning, analysis, or reporting	Never		Extremely useful	I have not use LLMs for this type of activity	Extremely useful	I have not use LLMs for this type of activity	I have not use LLMs for this type of activity	I have not use LLMs for this type of activity	Unsure / Don't Know	Unsure / Don't Know	Very Risky	Unsure / Don't Know	Unsure / Don't Know	Unsure / Don't Know	Acceptable	Acceptable	Acceptable	Acceptable	Unacceptable	Acceptable	Neutral	Neutral	Neutral	Neutral	Neutral	Neutral	Comfortable	Comfortable	Comfortable	Unsure / Don't Know	Unsure / Don't Know	Unsure / Don't Know
2024-01-26 12:05:18	2024-01-31 11:30:39	57	429920	FALSE	2024-02-07 11:35:29		Yes, to ask broad questions of the field such as current trends or important findings	Occasionally	Yes, to look up synonyms when I'm writing papers,Yes, to rewrite text I've written to fix grammatical issues or awkward phrasings,Yes, to support paper formatting (e.g., LaTeX, formatting tables or formulas)	Frequently	Yes, to rewrite my writing into a different style (e.g., more formal)	Never	Yes, to brainstorm research topics or questions to work on,Yes, to come up with new ways to frame a paper, including titles and abstracts	Rarely	No, I don't use LLMs for data generation	Never	No, I don't use LLMs for data cleaning, analysis, or reporting	Very Rarely
2023-11-28 3:02:03	2023-11-28 3:14:46	57	763	FALSE	2023-12-05 3:14:48		Yes, to ask broad questions of the field such as current trends or important findings	Occasionally	Yes, to rewrite text I've written to fix grammatical issues or awkward phrasings	Rarely	No, I don't use LLMs for directly writing text while I lead ideation	Never	Yes, to get inspiration for methods or approaches to use for a given problem	Rarely	No, I don't use LLMs for data generation	Never	No, I don't use LLMs for data cleaning, analysis, or reporting	Never		Slightly useful	Slightly useful	Not at all useful	Slightly useful	Slightly useful	Slightly useful	Very Risky	Very Risky	Very Risky	Moderately Risky	Very Risky	Very Risky	Unacceptable	Unacceptable	Unacceptable	Somewhat Unacceptable	Unacceptable	Unacceptable	Somewhat uncomfortable	Uncomfortable	Uncomfortable	Somewhat uncomfortable	Uncomfortable	Uncomfortable	Uncomfortable		Uncomfortable	Uncomfortable	Uncomfortable	Uncomfortable
2024-01-26 13:11:21	2024-01-26 13:16:27	100	306	TRUE	2024-01-26 13:16:28		No, I don't use LLMs for information seeking or reading	Never	Yes, to look up synonyms when I'm writing papers,Yes, to rewrite text I've written to fix grammatical issues or awkward phrasings	Never	No, I don't use LLMs for directly writing text while I lead ideation	Never	No, I don't use LLMs for ideation and framing	Never	Yes, to automatically produce both training examples and labels	Occasionally	No, I don't use LLMs for data cleaning, analysis, or reporting	Never		Not at all useful	Not at all useful	Not at all useful	Not at all useful	Moderately useful	Not at all useful	Extremely Risky	Moderately Risky	Extremely Risky	Extremely Risky	Slightly Risky	Very Risky	Acceptable	Acceptable	Unacceptable	Unacceptable	Acceptable	Somewhat Acceptable	Uncomfortable	Somewhat comfortable	Uncomfortable	Uncomfortable	Somewhat comfortable	Uncomfortable	Uncomfortable	Uncomfortable	Uncomfortable	Uncomfortable	Uncomfortable	Uncomfortable
2024-01-25 2:31:16	2024-01-25 2:36:36	100	320	TRUE	2024-01-25 2:36:37		Yes, to discover papers to read,Yes, to generate summaries or explanations of papers or technical terms in papers,Yes, to ask broad questions of the field such as current trends or important findings	Frequently	Yes, to look up synonyms when I'm writing papers,Yes, to support paper formatting (e.g., LaTeX, formatting tables or formulas)	Very Rarely	Yes, to shorten or summarize a long piece of text that I wrote	Very Rarely	Yes, to brainstorm research topics or questions to work on	Frequently	Yes, to generate synthetic interviews and survey responses	Very Rarely	Yes, to conduct statistical reporting of quantitative data	Very Rarely		Very useful	Very useful	Very useful	Slightly useful	Slightly useful	Moderately useful	Not at all Risky	Not at all Risky	Not at all Risky	Not at all Risky	Not at all Risky	Not at all Risky	Neutral	Neutral	Neutral	Acceptable	Acceptable	Acceptable	Neutral	Comfortable	Comfortable	Neutral	Comfortable	Comfortable	Neutral	Neutral	Comfortable	Comfortable	Comfortable	Comfortable
2024-01-25 15:22:48	2024-01-25 15:36:20	100	812	TRUE	2024-01-25 15:36:21		No, I don't use LLMs for information seeking or reading	Occasionally	No, I don't use LLMs for editing support when I am writing	Very Rarely	No, I don't use LLMs for directly writing text while I lead ideation	Very Rarely	No, I don't use LLMs for ideation and framing	Never	No, I don't use LLMs for data generation	Never	Yes, to conduct statistical reporting of quantitative data	Occasionally		Slightly useful	Very useful	Slightly useful	I have not use LLMs for this type of activity	I have not use LLMs for this type of activity	Very useful	Slightly Risky	Slightly Risky	Slightly Risky	Slightly Risky	Moderately Risky	Very Risky	Acceptable	Acceptable	Acceptable	Acceptable	Acceptable	Acceptable	Comfortable	Comfortable	Unsure / Don't Know	Comfortable	Comfortable	Comfortable	Comfortable	Somewhat comfortable	Comfortable	Comfortable	Neutral	Comfortable
2024-01-25 14:45:34	2024-01-25 14:53:34	100	480	TRUE	2024-01-25 14:53:34		Yes, to discover papers to read,Yes, to generate summaries or explanations of papers or technical terms in papers,Yes, to ask broad questions of the field such as current trends or important findings	Frequently	Yes, to look up synonyms when I'm writing papers,Yes, to rewrite text I've written to fix grammatical issues or awkward phrasings	Frequently	Yes, to shorten or summarize a long piece of text that I wrote	Occasionally	No, I don't use LLMs for ideation and framing	Never	No, I don't use LLMs for data generation	Never	No, I don't use LLMs for data cleaning, analysis, or reporting	Never		Extremely useful	Very useful	Very useful	I have not use LLMs for this type of activity	I have not use LLMs for this type of activity	I have not use LLMs for this type of activity	Slightly Risky	Slightly Risky	Moderately Risky	Very Risky	Extremely Risky	Very Risky	Acceptable	Acceptable	Acceptable	Neutral	Neutral	Neutral	Comfortable	Comfortable	Comfortable	Neutral	Neutral	Neutral	Comfortable	Comfortable	Comfortable	Neutral	Somewhat uncomfortable	Somewhat uncomfortable
2024-01-25 11:51:07	2024-01-25 12:07:25	100	977	TRUE	2024-01-25 12:07:27		Yes, to discover papers to read,Yes, to generate summaries or explanations of papers or technical terms in papers,Yes, to ask broad questions of the field such as current trends or important findings	Frequently	Yes, to support paper formatting (e.g., LaTeX, formatting tables or formulas)	Very Rarely	Yes, to draft paragraphs from ideas or bullet points,Yes, other:	Occasionally	Yes, to brainstorm research topics or questions to work on,Yes, to come up with new ways to frame a paper, including titles and abstracts,Yes, to get inspiration for methods or approaches to use for a given problem	Frequently	Yes, other:,No, I don't use LLMs for data generation	Occasionally	No, I don't use LLMs for data cleaning, analysis, or reporting	Rarely		Moderately useful	I have not use LLMs for this type of activity	Very useful	Very useful	I have not use LLMs for this type of activity	I have not use LLMs for this type of activity	Not at all Risky	Not at all Risky	Not at all Risky	Not at all Risky	Not at all Risky	Unsure / Don't Know	Acceptable	Acceptable	Acceptable	Acceptable	Acceptable	Acceptable	Comfortable	Comfortable	Comfortable	Comfortable	Comfortable	Comfortable	Comfortable	Comfortable	Comfortable	Comfortable	Comfortable	Comfortable
2023-11-15 12:51:31	2023-11-15 12:59:34	100	482	TRUE	2023-11-15 12:59:34		Yes, to discover papers to read	Frequently	Yes, to look up synonyms when I'm writing papers	Frequently	Yes, to shorten or summarize a long piece of text that I wrote	Frequently	Yes, to brainstorm research topics or questions to work on	Frequently	Yes, to generate synthetic interviews and survey responses	Frequently	Yes, to simulate human ratings of an existing dataset for evaluation (e.g., summarization quality)	Frequently		Very useful	Very useful	Very useful	Very useful	Very useful	Extremely useful		Unsure / Don't Know	Unsure / Don't Know	Unsure / Don't Know	Unsure / Don't Know	Unsure / Don't Know	Unsure / Don't Know	Acceptable	Acceptable	Acceptable	Acceptable	Acceptable		Comfortable	Comfortable	Comfortable	Comfortable	Comfortable		Comfortable	Comfortable	Comfortable	Comfortable	Comfortable
2023-11-15 6:18:05	2023-11-15 6:21:16	43	190	FALSE	2023-11-22 6:21:18		Yes, to discover papers to read	Rarely	Yes, to rewrite text I've written to fix grammatical issues or awkward phrasings	Never	Yes, to shorten or summarize a long piece of text that I wrote,Yes, to draft paragraphs from ideas or bullet points,Yes, to rewrite my writing into a different style (e.g., more formal)	Rarely	Yes, to brainstorm research topics or questions to work on,Yes, to come up with new ways to frame a paper, including titles and abstracts	Very Rarely	No, I don't use LLMs for data generation	Never	No, I don't use LLMs for data cleaning, analysis, or reporting	Never
2024-01-25 12:53:09	2024-01-25 13:27:11	100	2041	TRUE	2024-01-25 13:27:11		No, I don't use LLMs for information seeking or reading	Never	No, I don't use LLMs for editing support when I am writing	Never	No, I don't use LLMs for directly writing text while I lead ideation	Never	No, I don't use LLMs for ideation and framing	Never	No, I don't use LLMs for data generation	Never	No, I don't use LLMs for data cleaning, analysis, or reporting	Never		Not at all useful	Not at all useful	Not at all useful	Not at all useful	Not at all useful	Not at all useful	Extremely Risky	Extremely Risky	Extremely Risky	Extremely Risky	Extremely Risky	Extremely Risky	Acceptable	Acceptable	Unacceptable	Somewhat Acceptable	Somewhat Acceptable	Somewhat Acceptable	Comfortable	Somewhat uncomfortable	Uncomfortable	Uncomfortable	Uncomfortable	Somewhat uncomfortable	Comfortable	Uncomfortable	Uncomfortable	Uncomfortable	Uncomfortable	Uncomfortable
2023-11-29 6:28:44	2023-11-29 6:36:49	100	485	TRUE	2023-11-29 6:36:50		Yes, to generate summaries or explanations of papers or technical terms in papers	Occasionally	Yes, to rewrite text I've written to fix grammatical issues or awkward phrasings,Yes, to support paper formatting (e.g., LaTeX, formatting tables or formulas)	Occasionally	No, I don't use LLMs for directly writing text while I lead ideation	Never	No, I don't use LLMs for ideation and framing	Never	Yes, to automatically produce both training examples and labels	Occasionally	Yes, to clean and reformat datasets,Yes, to simulate human ratings of an existing dataset for evaluation (e.g., summarization quality)	Occasionally		Not at all useful	Very useful	Moderately useful	Not at all useful	Very useful	Very useful	Moderately Risky	Not at all Risky	Extremely Risky	Extremely Risky	Moderately Risky	Slightly Risky	Acceptable	Acceptable	Unacceptable	Unacceptable	Neutral	Neutral	Somewhat uncomfortable	Comfortable	Uncomfortable	Uncomfortable	Neutral	Neutral	Somewhat uncomfortable	Comfortable	Neutral	Uncomfortable	Neutral	Neutral
2023-11-28 3:42:11	2023-11-28 6:23:08	100	9656	TRUE	2023-11-28 6:23:08		Yes, to generate summaries or explanations of papers or technical terms in papers,Yes, to ask broad questions of the field such as current trends or important findings,Yes, other:	Occasionally	Yes, to rewrite text I've written to fix grammatical issues or awkward phrasings,Yes, other:	Rarely	Yes, to draft paragraphs from ideas or bullet points	Occasionally	Yes, to get inspiration for methods or approaches to use for a given problem,Yes, other:	Frequently	No, I don't use LLMs for data generation	Never	No, I don't use LLMs for data cleaning, analysis, or reporting	Never		Moderately useful	Extremely useful	Moderately useful	Moderately useful	Not at all useful	Not at all useful		Extremely Risky	Extremely Risky	Extremely Risky	Extremely Risky	Extremely Risky	Acceptable	Acceptable	Acceptable	Acceptable	Unacceptable	Somewhat Acceptable	Somewhat uncomfortable	Somewhat uncomfortable	Somewhat uncomfortable	Comfortable	Uncomfortable	Comfortable	Neutral	Comfortable	Uncomfortable	Comfortable	Uncomfortable	Somewhat uncomfortable
2023-11-15 22:16:32	2023-11-15 22:18:31	43	118	FALSE	2023-11-22 22:18:34		Yes, to generate summaries or explanations of papers or technical terms in papers,Yes, to ask broad questions of the field such as current trends or important findings	Frequently	No, I don't use LLMs for editing support when I am writing	Never	No, I don't use LLMs for directly writing text while I lead ideation	Never	Yes, to brainstorm research topics or questions to work on,Yes, to come up with new ways to frame a paper, including titles and abstracts,Yes, to get inspiration for methods or approaches to use for a given problem	Occasionally	No, I don't use LLMs for data generation	Never	No, I don't use LLMs for data cleaning, analysis, or reporting	Never
2023-11-28 4:13:04	2023-11-28 4:33:02	100	1197	TRUE	2023-11-28 4:33:03		Yes, to generate summaries or explanations of papers or technical terms in papers,Yes, to ask broad questions of the field such as current trends or important findings	Frequently	No, I don't use LLMs for editing support when I am writing	Rarely	Yes, to shorten or summarize a long piece of text that I wrote	Very Rarely	Yes, to brainstorm research topics or questions to work on,Yes, to get inspiration for methods or approaches to use for a given problem	Frequently	No, I don't use LLMs for data generation	Never	No, I don't use LLMs for data cleaning, analysis, or reporting	Very Rarely		Very useful	Moderately useful	Moderately useful	Very useful	Slightly useful	Slightly useful	Slightly Risky	Extremely Risky	Very Risky	Slightly Risky	Unsure / Don't Know	Unsure / Don't Know	Acceptable	Acceptable	Somewhat Unacceptable	Acceptable	Somewhat Unacceptable	Somewhat Unacceptable	Comfortable	Somewhat comfortable	Somewhat uncomfortable	Somewhat comfortable	Somewhat uncomfortable	Somewhat uncomfortable	Comfortable	Comfortable	Comfortable	Comfortable	Comfortable	Comfortable
2023-11-28 6:14:06	2023-11-28 6:29:05	43	899	FALSE	2023-12-05 6:29:15		No, I don't use LLMs for information seeking or reading	Very Rarely	Yes, to rewrite text I've written to fix grammatical issues or awkward phrasings	Frequently	Yes, to shorten or summarize a long piece of text that I wrote,Yes, to draft paragraphs from ideas or bullet points	Rarely	Yes, to get inspiration for methods or approaches to use for a given problem	Frequently	No, I don't use LLMs for data generation	Never	No, I don't use LLMs for data cleaning, analysis, or reporting	Never
2023-11-15 7:59:11	2023-11-15 8:08:56	100	584	TRUE	2023-11-15 8:08:57		Yes, to discover papers to read	Occasionally	Yes, to rewrite text I've written to fix grammatical issues or awkward phrasings	Occasionally	No, I don't use LLMs for directly writing text while I lead ideation	Never	No, I don't use LLMs for ideation and framing	Never	No, I don't use LLMs for data generation	Never	Yes, to clean and reformat datasets	Occasionally		Extremely useful	Extremely useful	I have not use LLMs for this type of activity	I have not use LLMs for this type of activity	I have not use LLMs for this type of activity	Extremely useful	Extremely Risky	Slightly Risky	Unsure / Don't Know	Unsure / Don't Know	Unsure / Don't Know	Moderately Risky	Acceptable	Acceptable	Acceptable	Acceptable	Acceptable	Acceptable	Comfortable	Comfortable	Neutral	Neutral	Neutral	Comfortable	Comfortable	Comfortable	Somewhat uncomfortable	Somewhat uncomfortable	Somewhat uncomfortable	Comfortable
2023-11-14 20:23:08	2023-11-14 20:32:18	100	550	TRUE	2023-11-14 20:32:19		No, I don't use LLMs for information seeking or reading	Very Rarely	Yes, to rewrite text I've written to fix grammatical issues or awkward phrasings	Never	No, I don't use LLMs for directly writing text while I lead ideation	Never	No, I don't use LLMs for ideation and framing	Never	Yes, to automatically produce both training examples and labels	Occasionally	No, I don't use LLMs for data cleaning, analysis, or reporting	Never		I have not use LLMs for this type of activity	Very useful	Moderately useful	Slightly useful	Very useful	Moderately useful	Moderately Risky	Slightly Risky	Very Risky	Moderately Risky	Very Risky	Moderately Risky	Acceptable	Acceptable	Neutral	Neutral	Somewhat Acceptable	Somewhat Acceptable	Comfortable	Comfortable	Neutral	Neutral	Somewhat comfortable	Neutral	Neutral	Somewhat comfortable	Unsure / Don't Know	Unsure / Don't Know	Somewhat comfortable	Unsure / Don't Know
2023-11-17 19:26:00	2023-11-17 19:38:44	43	764	FALSE	2023-11-24 19:38:48		No, I don't use LLMs for information seeking or reading	Never	No, I don't use LLMs for editing support when I am writing	Never	No, I don't use LLMs for directly writing text while I lead ideation	Never	No, I don't use LLMs for ideation and framing	Never	No, I don't use LLMs for data generation	Never	No, I don't use LLMs for data cleaning, analysis, or reporting	Never
2023-11-28 3:39:54	2023-11-28 4:04:36	57	1482	FALSE	2023-12-05 4:04:37		Yes, to discover papers to read,Yes, to discover important topics or threads of research for literature review,Yes, to generate summaries or explanations of papers or technical terms in papers	Occasionally	Yes, to rewrite text I've written to fix grammatical issues or awkward phrasings,No, I don't use LLMs for editing support when I am writing	Occasionally	Yes, to shorten or summarize a long piece of text that I wrote	Occasionally	Yes, to brainstorm research topics or questions to work on	Occasionally	Yes, to generate synthetic interviews and survey responses	Occasionally	Yes, to conduct statistical reporting of quantitative data	Occasionally		Very useful	Very useful	Very useful	Very useful	Very useful	Moderately useful	Not at all Risky	Slightly Risky	Very Risky		Slightly Risky	Not at all Risky	Acceptable	Acceptable	Acceptable	Acceptable	Acceptable	Somewhat Acceptable		Neutral	Comfortable	Neutral	Neutral	Neutral	Neutral	Somewhat uncomfortable	Comfortable	Comfortable	Unsure / Don't Know	Neutral
2024-01-26 7:00:52	2024-01-26 8:01:49	57	3656	FALSE	2024-02-02 8:01:51		Yes, to discover papers to read,Yes, to discover important topics or threads of research for literature review,Yes, to generate summaries or explanations of papers or technical terms in papers	Frequently	No, I don't use LLMs for editing support when I am writing	Never	No, I don't use LLMs for directly writing text while I lead ideation	Never	No, I don't use LLMs for ideation and framing	Never	No, I don't use LLMs for data generation	Never	No, I don't use LLMs for data cleaning, analysis, or reporting	Never		Very useful	I have not use LLMs for this type of activity	I have not use LLMs for this type of activity	I have not use LLMs for this type of activity	I have not use LLMs for this type of activity	I have not use LLMs for this type of activity	Very Risky	Slightly Risky	Extremely Risky	Not at all Risky	Extremely Risky	Extremely Risky	Acceptable	Acceptable	Neutral	Neutral	Somewhat Unacceptable	Neutral	Comfortable	Neutral	Neutral	Neutral	Uncomfortable	Somewhat uncomfortable	Comfortable	Somewhat uncomfortable	Somewhat uncomfortable	Somewhat uncomfortable	Uncomfortable	Neutral
2023-11-28 3:53:07	2023-11-28 4:08:28	100	921	TRUE	2023-11-28 4:08:29		Yes, other:	Occasionally	Yes, to rewrite text I've written to fix grammatical issues or awkward phrasings	Occasionally	Yes, to rewrite my writing into a different style (e.g., more formal)	Rarely	No, I don't use LLMs for ideation and framing	Never	No, I don't use LLMs for data generation	Never	No, I don't use LLMs for data cleaning, analysis, or reporting	Never		Slightly useful	Very useful	Slightly useful	Not at all useful	Not at all useful	Not at all useful	Moderately Risky	Slightly Risky	Very Risky	Moderately Risky	Extremely Risky	Extremely Risky	Somewhat Acceptable	Acceptable	Somewhat Unacceptable	Neutral	Somewhat Acceptable	Acceptable	Comfortable	Somewhat comfortable	Somewhat uncomfortable	Somewhat comfortable	Neutral	Somewhat comfortable	Unsure / Don't Know	Unsure / Don't Know	Unsure / Don't Know	Unsure / Don't Know	Unsure / Don't Know	Unsure / Don't Know
2024-01-26 9:54:48	2024-01-26 10:30:26	100	2137	TRUE	2024-01-26 10:30:27		Yes, to discover papers to read,Yes, to discover important topics or threads of research for literature review,Yes, to generate summaries or explanations of papers or technical terms in papers,Yes, to ask broad questions of the field such as current trends or important findings,Yes, other:	Frequently	Yes, to look up synonyms when I'm writing papers,Yes, to rewrite text I've written to fix grammatical issues or awkward phrasings,Yes, to support paper formatting (e.g., LaTeX, formatting tables or formulas)	Frequently	Yes, to shorten or summarize a long piece of text that I wrote,Yes, to draft paragraphs from ideas or bullet points,Yes, to rewrite my writing into a different style (e.g., more formal)	Occasionally	No, I don't use LLMs for ideation and framing	Never	No, I don't use LLMs for data generation	Never	Yes, to clean and reformat datasets	Rarely		Very useful	Moderately useful	Slightly useful	I have not use LLMs for this type of activity	I have not use LLMs for this type of activity	Slightly useful	Moderately Risky	Slightly Risky	Very Risky	Extremely Risky	Extremely Risky	Slightly Risky	Acceptable	Acceptable	Neutral	Somewhat Unacceptable	Somewhat Unacceptable	Acceptable	Comfortable	Neutral	Neutral	Somewhat uncomfortable	Uncomfortable	Somewhat comfortable	Comfortable	Somewhat comfortable	Somewhat uncomfortable	Somewhat uncomfortable	Somewhat uncomfortable	Comfortable
2023-11-29 1:03:33	2023-11-29 1:08:45	43	312	FALSE	2023-12-06 1:08:50		No, I don't use LLMs for information seeking or reading	Very Rarely	Yes, to look up synonyms when I'm writing papers,Yes, to rewrite text I've written to fix grammatical issues or awkward phrasings,Yes, to support paper formatting (e.g., LaTeX, formatting tables or formulas)	Very Frequently	Yes, other:	Occasionally	No, I don't use LLMs for ideation and framing	Very Rarely	No, I don't use LLMs for data generation	Never	No, I don't use LLMs for data cleaning, analysis, or reporting	Never
2023-11-28 22:42:52	2023-11-28 23:10:23	100	1651	TRUE	2023-11-28 23:10:24		No, I don't use LLMs for information seeking or reading	Very Rarely	Yes, to rewrite text I've written to fix grammatical issues or awkward phrasings	Frequently	Yes, to shorten or summarize a long piece of text that I wrote,Yes, to rewrite my writing into a different style (e.g., more formal)	Very Rarely	Yes, to come up with new ways to frame a paper, including titles and abstracts	Occasionally	Yes, to generate synthetic interviews and survey responses	Rarely	Yes, to conduct analysis and reporting of qualitative data (e.g., of participant interviews)	Rarely		I have not use LLMs for this type of activity	Moderately useful	I have not use LLMs for this type of activity	Moderately useful	Moderately useful	I have not use LLMs for this type of activity	Extremely Risky	Moderately Risky	Extremely Risky	Moderately Risky	Moderately Risky	Moderately Risky	Acceptable	Acceptable	Acceptable	Acceptable	Acceptable	Neutral	Comfortable	Comfortable	Comfortable	Comfortable	Comfortable	Comfortable	Comfortable	Comfortable	Comfortable	Comfortable	Comfortable	Comfortable
2024-01-26 2:55:41	2024-01-26 3:05:38	100	597	TRUE	2024-01-26 3:05:39		No, I don't use LLMs for information seeking or reading	Very Rarely	Yes, to rewrite text I've written to fix grammatical issues or awkward phrasings	Occasionally	Yes, to shorten or summarize a long piece of text that I wrote,Yes, to rewrite my writing into a different style (e.g., more formal)	Never	No, I don't use LLMs for ideation and framing	Never	No, I don't use LLMs for data generation	Never	No, I don't use LLMs for data cleaning, analysis, or reporting	Never		I have not use LLMs for this type of activity	Very useful	I have not use LLMs for this type of activity	I have not use LLMs for this type of activity	I have not use LLMs for this type of activity	I have not use LLMs for this type of activity	Very Risky	Slightly Risky	Very Risky	Unsure / Don't Know	Extremely Risky	Extremely Risky	Somewhat Acceptable	Acceptable	Somewhat Unacceptable	Somewhat Unacceptable	Unacceptable	Somewhat Unacceptable	Comfortable	Comfortable	Comfortable	Comfortable	Comfortable	Comfortable	Comfortable	Comfortable	Comfortable	Comfortable	Comfortable	Comfortable
2024-01-25 4:40:32	2024-01-25 4:50:20	100	588	TRUE	2024-01-25 4:50:21		No, I don't use LLMs for information seeking or reading	Never	No, I don't use LLMs for editing support when I am writing	Never	No, I don't use LLMs for directly writing text while I lead ideation	Never	No, I don't use LLMs for ideation and framing	Never	Yes, other:	Occasionally	No, I don't use LLMs for data cleaning, analysis, or reporting	Never		I have not use LLMs for this type of activity	I have not use LLMs for this type of activity	I have not use LLMs for this type of activity	I have not use LLMs for this type of activity	I have not use LLMs for this type of activity	I have not use LLMs for this type of activity	Unsure / Don't Know	Unsure / Don't Know	Unsure / Don't Know	Unsure / Don't Know	Moderately Risky	Unsure / Don't Know	Neutral	Acceptable	Unacceptable	Neutral	Acceptable	Somewhat Acceptable	Comfortable	Comfortable	Unsure / Don't Know	Unsure / Don't Know	Comfortable	Unsure / Don't Know	Comfortable	Comfortable	Unsure / Don't Know	Unsure / Don't Know	Comfortable	Unsure / Don't Know
2024-01-24 21:31:48	2024-01-24 21:46:25	100	877	TRUE	2024-01-24 21:46:26		Yes, to generate summaries or explanations of papers or technical terms in papers	Occasionally	Yes, to rewrite text I've written to fix grammatical issues or awkward phrasings	Frequently	No, I don't use LLMs for directly writing text while I lead ideation	Never	No, I don't use LLMs for ideation and framing	Never	Yes, to automatically produce both training examples and labels	Occasionally	Yes, to simulate human ratings of an existing dataset for evaluation (e.g., summarization quality)	Frequently		Moderately useful	Extremely useful	Not at all useful	Slightly useful	Very useful	Very useful	Not at all Risky	Very Risky	Very Risky	Moderately Risky	Moderately Risky	Moderately Risky	Acceptable	Acceptable	Neutral	Somewhat Acceptable	Acceptable	Somewhat Acceptable	Comfortable	Somewhat comfortable	Neutral	Neutral	Somewhat comfortable	Comfortable	Somewhat uncomfortable	Uncomfortable	Neutral	Neutral	Somewhat uncomfortable	Somewhat uncomfortable
2023-11-29 1:18:29	2023-11-29 1:32:14	100	825	TRUE	2023-11-29 1:32:15		Yes, to discover papers to read,Yes, to discover important topics or threads of research for literature review,Yes, to generate summaries or explanations of papers or technical terms in papers,Yes, to ask broad questions of the field such as current trends or important findings	Frequently	Yes, to rewrite text I've written to fix grammatical issues or awkward phrasings	Frequently	Yes, to shorten or summarize a long piece of text that I wrote,Yes, to draft paragraphs from ideas or bullet points,Yes, to rewrite my writing into a different style (e.g., more formal)	Occasionally	Yes, to brainstorm research topics or questions to work on,Yes, to come up with new ways to frame a paper, including titles and abstracts,Yes, to get inspiration for methods or approaches to use for a given problem	Occasionally	No, I don't use LLMs for data generation	Never	No, I don't use LLMs for data cleaning, analysis, or reporting	Never		Extremely useful	Moderately useful	Slightly useful	Moderately useful	I have not use LLMs for this type of activity	I have not use LLMs for this type of activity	Very Risky	Not at all Risky	Extremely Risky	Slightly Risky	Unsure / Don't Know	Unsure / Don't Know	Acceptable	Acceptable	Somewhat Unacceptable	Somewhat Acceptable	Unacceptable	Acceptable	Neutral	Somewhat comfortable	Neutral	Somewhat uncomfortable	Unsure / Don't Know	Unsure / Don't Know	Comfortable	Comfortable	Somewhat uncomfortable	Somewhat uncomfortable	Unsure / Don't Know	Comfortable
2023-11-27 17:39:26	2023-11-27 17:56:02	100	996	TRUE	2023-11-27 17:56:04		Yes, to discover important topics or threads of research for literature review	Occasionally	Yes, to look up synonyms when I'm writing papers	Rarely	Yes, to draft paragraphs from ideas or bullet points	Occasionally	Yes, to get inspiration for methods or approaches to use for a given problem	Rarely	Yes, to generate synthetic interviews and survey responses	Rarely	Yes, to conduct statistical reporting of quantitative data	Occasionally		Moderately useful	Moderately useful	Moderately useful	Very useful	Moderately useful	Moderately useful	Very Risky	Very Risky	Very Risky	Very Risky	Very Risky	Very Risky	Somewhat Acceptable	Somewhat Acceptable	Somewhat Acceptable	Somewhat Acceptable	Somewhat Acceptable	Somewhat Acceptable	Somewhat uncomfortable	Somewhat uncomfortable	Somewhat uncomfortable	Somewhat uncomfortable	Somewhat uncomfortable	Somewhat uncomfortable	Neutral	Neutral	Neutral	Neutral	Neutral	Neutral
2023-11-15 19:55:35	2023-11-15 20:02:32	57	417	FALSE	2023-11-22 20:02:34		Yes, to discover important topics or threads of research for literature review	Frequently	No, I don't use LLMs for editing support when I am writing	Occasionally	Yes, to draft paragraphs from ideas or bullet points	Occasionally	Yes, to come up with new ways to frame a paper, including titles and abstracts	Occasionally	Yes, to automatically produce training labels given example data	Occasionally	Yes, to conduct statistical reporting of quantitative data	Occasionally		Very useful	Very useful	Very useful	Very useful	Very useful	Very useful	Very Risky	Very Risky	Very Risky	Very Risky	Very Risky	Very Risky	Acceptable	Acceptable	Acceptable	Acceptable	Acceptable	Acceptable	Comfortable	Comfortable	Comfortable	Comfortable	Comfortable	Comfortable	Comfortable	Comfortable	Comfortable	Comfortable	Comfortable	Comfortable
2023-11-29 17:09:19	2023-11-29 17:22:35	100	796	TRUE	2023-11-29 17:22:37		Yes, to generate summaries or explanations of papers or technical terms in papers	Frequently	No, I don't use LLMs for editing support when I am writing	Never	No, I don't use LLMs for directly writing text while I lead ideation	Never	No, I don't use LLMs for ideation and framing	Never	No, I don't use LLMs for data generation	Never	Yes, to conduct statistical reporting of quantitative data	Occasionally		Very useful	Slightly useful	Moderately useful	I have not use LLMs for this type of activity	Slightly useful	Very useful	Moderately Risky	Moderately Risky	Moderately Risky	Moderately Risky	Extremely Risky	Slightly Risky	Acceptable	Acceptable	Neutral	Neutral	Somewhat Acceptable	Acceptable	Somewhat comfortable	Neutral	Neutral	Uncomfortable	Uncomfortable	Comfortable	Somewhat comfortable	Neutral	Neutral	Uncomfortable	Uncomfortable	Comfortable
2023-11-16 7:35:37	2023-11-16 7:50:42	100	904	TRUE	2023-11-16 7:50:44		No, I don't use LLMs for information seeking or reading	Never	No, I don't use LLMs for editing support when I am writing	Never	No, I don't use LLMs for directly writing text while I lead ideation	Never	No, I don't use LLMs for ideation and framing	Never	No, I don't use LLMs for data generation	Never	No, I don't use LLMs for data cleaning, analysis, or reporting	Never		I have not use LLMs for this type of activity	I have not use LLMs for this type of activity	I have not use LLMs for this type of activity	I have not use LLMs for this type of activity	I have not use LLMs for this type of activity	I have not use LLMs for this type of activity	Unsure / Don't Know	Unsure / Don't Know	Unsure / Don't Know	Unsure / Don't Know	Unsure / Don't Know	Unsure / Don't Know	Unsure / Don't Know	Unsure / Don't Know	Unsure / Don't Know	Unsure / Don't Know	Unsure / Don't Know	Unsure / Don't Know	Unsure / Don't Know	Unsure / Don't Know	Unsure / Don't Know	Unsure / Don't Know	Unsure / Don't Know	Unsure / Don't Know	Unsure / Don't Know	Unsure / Don't Know	Unsure / Don't Know	Unsure / Don't Know	Unsure / Don't Know	Unsure / Don't Know
2023-11-15 9:17:01	2023-11-15 9:20:06	43	185	FALSE	2023-11-22 9:20:37		Yes, to discover papers to read,Yes, to discover important topics or threads of research for literature review	Frequently	Yes, to look up synonyms when I'm writing papers,Yes, to rewrite text I've written to fix grammatical issues or awkward phrasings,Yes, to support paper formatting (e.g., LaTeX, formatting tables or formulas)	Very Frequently	No, I don't use LLMs for directly writing text while I lead ideation	Never	Yes, to come up with new ways to frame a paper, including titles and abstracts	Very Rarely	Yes, to generate synthetic interviews and survey responses	Occasionally	No, I don't use LLMs for data cleaning, analysis, or reporting	Never
2023-11-28 13:42:58	2023-11-28 14:12:28	100	1770	TRUE	2023-11-28 14:12:29		No, I don't use LLMs for information seeking or reading	Very Rarely	No, I don't use LLMs for editing support when I am writing	Never	No, I don't use LLMs for directly writing text while I lead ideation	Very Rarely	No, I don't use LLMs for ideation and framing	Never	No, I don't use LLMs for data generation	Very Rarely	No, I don't use LLMs for data cleaning, analysis, or reporting	Very Rarely		Slightly useful	I have not use LLMs for this type of activity	I have not use LLMs for this type of activity	I have not use LLMs for this type of activity	Slightly useful	Slightly useful	Very Risky	Extremely Risky	Extremely Risky	Extremely Risky	Slightly Risky	Slightly Risky	Unsure / Don't Know	Unsure / Don't Know	Unsure / Don't Know	Unsure / Don't Know	Somewhat Acceptable	Somewhat Acceptable	Uncomfortable	Uncomfortable	Uncomfortable	Uncomfortable	Neutral	Neutral	Neutral	Somewhat uncomfortable	Uncomfortable	Uncomfortable	Somewhat uncomfortable	Somewhat uncomfortable
2023-11-28 2:44:14	2023-11-28 3:08:48	100	1474	TRUE	2023-11-28 3:08:49		No, I don't use LLMs for information seeking or reading	Never	No, I don't use LLMs for editing support when I am writing	Never	No, I don't use LLMs for directly writing text while I lead ideation	Never	No, I don't use LLMs for ideation and framing	Never	No, I don't use LLMs for data generation	Never	No, I don't use LLMs for data cleaning, analysis, or reporting	Never		I have not use LLMs for this type of activity	I have not use LLMs for this type of activity	I have not use LLMs for this type of activity	I have not use LLMs for this type of activity	I have not use LLMs for this type of activity	I have not use LLMs for this type of activity	Unsure / Don't Know	Unsure / Don't Know	Unsure / Don't Know	Unsure / Don't Know	Unsure / Don't Know	Unsure / Don't Know		Unsure / Don't Know		Unsure / Don't Know	Unsure / Don't Know	Unsure / Don't Know		Unsure / Don't Know	Unsure / Don't Know	Unsure / Don't Know	Unsure / Don't Know	Unsure / Don't Know	Unsure / Don't Know	Unsure / Don't Know	Unsure / Don't Know	Unsure / Don't Know	Unsure / Don't Know	Unsure / Don't Know
2023-11-29 4:06:51	2023-11-29 4:24:05	100	1034	TRUE	2023-11-29 4:24:06		Yes, to discover papers to read,Yes, to discover important topics or threads of research for literature review,Yes, to generate summaries or explanations of papers or technical terms in papers	Occasionally	No, I don't use LLMs for editing support when I am writing	Occasionally	No, I don't use LLMs for directly writing text while I lead ideation	Never	Yes, to brainstorm research topics or questions to work on	Occasionally	No, I don't use LLMs for data generation	Never	No, I don't use LLMs for data cleaning, analysis, or reporting	Never		I have not use LLMs for this type of activity	I have not use LLMs for this type of activity	I have not use LLMs for this type of activity	I have not use LLMs for this type of activity	I have not use LLMs for this type of activity	I have not use LLMs for this type of activity		Unsure / Don't Know	Unsure / Don't Know	Unsure / Don't Know	Unsure / Don't Know	Unsure / Don't Know	Acceptable	Unacceptable	Unacceptable	Acceptable	Acceptable	Acceptable	Unsure / Don't Know	Comfortable	Uncomfortable	Uncomfortable	Uncomfortable	Comfortable	Comfortable	Comfortable	Comfortable	Comfortable	Comfortable	Comfortable
2023-11-18 15:39:52	2023-11-18 16:16:39	100	2206	TRUE	2023-11-18 16:16:40		Yes, to discover papers to read,Yes, to discover important topics or threads of research for literature review,Yes, to ask broad questions of the field such as current trends or important findings	Frequently	Yes, to rewrite text I've written to fix grammatical issues or awkward phrasings,Yes, to support paper formatting (e.g., LaTeX, formatting tables or formulas)	Occasionally	Yes, to rewrite my writing into a different style (e.g., more formal)	Very Rarely	Yes, to brainstorm research topics or questions to work on	Very Rarely	No, I don't use LLMs for data generation	Never	No, I don't use LLMs for data cleaning, analysis, or reporting	Never		Very useful	Very useful	Slightly useful	Very useful	I have not use LLMs for this type of activity	I have not use LLMs for this type of activity	Moderately Risky	Slightly Risky	Extremely Risky	Moderately Risky	Unsure / Don't Know	Unsure / Don't Know	Acceptable	Acceptable	Somewhat Unacceptable	Neutral	Neutral	Neutral	Neutral	Comfortable	Somewhat uncomfortable	Somewhat uncomfortable	Unsure / Don't Know	Unsure / Don't Know	Neutral	Comfortable	Somewhat uncomfortable	Somewhat uncomfortable	Unsure / Don't Know	Unsure / Don't Know
2023-11-28 19:07:04	2023-11-28 19:18:54	100	710	TRUE	2023-11-28 19:18:55		Yes, other:	Occasionally	Yes, to rewrite text I've written to fix grammatical issues or awkward phrasings	Occasionally	Yes, to rewrite my writing into a different style (e.g., more formal)	Occasionally	No, I don't use LLMs for ideation and framing	Occasionally	No, I don't use LLMs for data generation	Never	No, I don't use LLMs for data cleaning, analysis, or reporting	Occasionally		Moderately useful	Slightly useful	I have not use LLMs for this type of activity	Not at all useful	Not at all useful	Slightly useful	Not at all Risky		Very Risky	Moderately Risky	Moderately Risky	Moderately Risky	Somewhat Acceptable	Neutral	Somewhat Unacceptable	Neutral	Neutral	Neutral	Somewhat uncomfortable	Somewhat comfortable	Somewhat uncomfortable	Neutral	Neutral	Somewhat comfortable	Somewhat uncomfortable	Somewhat uncomfortable	Somewhat uncomfortable	Somewhat comfortable	Somewhat uncomfortable	Neutral
2024-01-26 10:17:31	2024-01-26 10:23:53	100	381	TRUE	2024-01-26 10:23:54		Yes, to discover papers to read,Yes, to discover important topics or threads of research for literature review	Rarely	Yes, to look up synonyms when I'm writing papers,Yes, to rewrite text I've written to fix grammatical issues or awkward phrasings	Frequently	Yes, to rewrite my writing into a different style (e.g., more formal)	Rarely	No, I don't use LLMs for ideation and framing	Never	No, I don't use LLMs for data generation	Never	No, I don't use LLMs for data cleaning, analysis, or reporting	Never		Moderately useful	Extremely useful	Slightly useful	Not at all useful	Not at all useful	Not at all useful	Moderately Risky	Not at all Risky	Slightly Risky	Moderately Risky	Extremely Risky	Extremely Risky	Acceptable	Acceptable	Somewhat Acceptable	Somewhat Unacceptable	Unacceptable	Somewhat Unacceptable	Comfortable	Comfortable	Comfortable	Comfortable	Comfortable	Comfortable	Comfortable	Comfortable	Comfortable	Comfortable	Comfortable	Comfortable
2023-12-06 13:57:13	2023-12-06 14:09:16	100	722	TRUE	2023-12-06 14:09:17		No, I don't use LLMs for information seeking or reading	Never	Yes, to rewrite text I've written to fix grammatical issues or awkward phrasings	Very Frequently	Yes, to shorten or summarize a long piece of text that I wrote,Yes, to draft paragraphs from ideas or bullet points,Yes, to rewrite my writing into a different style (e.g., more formal)	Very Frequently	No, I don't use LLMs for ideation and framing	Never	No, I don't use LLMs for data generation	Never	Yes, to conduct statistical reporting of quantitative data,Yes, to conduct analysis and reporting of qualitative data (e.g., of participant interviews)	Frequently		I have not use LLMs for this type of activity	Very useful	Very useful	Moderately useful	I have not use LLMs for this type of activity	Very useful	Extremely Risky	Slightly Risky	Moderately Risky	Moderately Risky	Very Risky	Moderately Risky	Acceptable	Acceptable	Acceptable	Acceptable	Acceptable	Acceptable	Comfortable	Comfortable	Comfortable	Comfortable	Comfortable	Comfortable	Comfortable	Comfortable	Comfortable	Comfortable	Comfortable	Comfortable
2023-11-15 10:32:51	2023-11-15 10:54:16	100	1284	TRUE	2023-11-15 10:54:17		Yes, to discover papers to read,Yes, to discover important topics or threads of research for literature review,Yes, to generate summaries or explanations of papers or technical terms in papers,Yes, to ask broad questions of the field such as current trends or important findings,Yes, other:	Very Frequently	Yes, to look up synonyms when I'm writing papers,Yes, to rewrite text I've written to fix grammatical issues or awkward phrasings,Yes, to support paper formatting (e.g., LaTeX, formatting tables or formulas)	Very Frequently	Yes, to shorten or summarize a long piece of text that I wrote,Yes, to draft paragraphs from ideas or bullet points,Yes, to rewrite my writing into a different style (e.g., more formal)	Very Frequently	Yes, to brainstorm research topics or questions to work on,Yes, to get inspiration for methods or approaches to use for a given problem	Very Frequently	Yes, other:	Very Frequently	Yes, to clean and reformat datasets,Yes, to conduct statistical reporting of quantitative data	Very Frequently		Extremely useful	Moderately useful	Extremely useful	Extremely useful	Moderately useful	Extremely useful	Not at all Risky	Not at all Risky	Not at all Risky	Not at all Risky	Very Risky	Slightly Risky	Acceptable	Acceptable	Acceptable	Acceptable	Acceptable	Acceptable	Comfortable	Comfortable	Comfortable	Comfortable	Somewhat uncomfortable	Comfortable	Somewhat comfortable	Somewhat comfortable	Somewhat comfortable	Somewhat uncomfortable	Uncomfortable	Somewhat comfortable
2024-01-25 4:50:03	2024-01-25 5:07:12	100	1029	TRUE	2024-01-25 5:07:13		No, I don't use LLMs for information seeking or reading	Never	No, I don't use LLMs for editing support when I am writing	Never	No, I don't use LLMs for directly writing text while I lead ideation	Never	No, I don't use LLMs for ideation and framing	Never	No, I don't use LLMs for data generation	Never	No, I don't use LLMs for data cleaning, analysis, or reporting	Never		Not at all useful	Not at all useful	Not at all useful	Slightly useful	Not at all useful	Not at all useful	Extremely Risky	Very Risky	Extremely Risky	Moderately Risky	Extremely Risky	Extremely Risky	Somewhat Unacceptable	Somewhat Acceptable	Somewhat Unacceptable	Somewhat Acceptable	Somewhat Unacceptable	Unacceptable	Somewhat uncomfortable	Neutral	Uncomfortable	Neutral	Uncomfortable	Uncomfortable	Somewhat uncomfortable	Neutral	Neutral	Neutral	Somewhat uncomfortable	Somewhat uncomfortable
2024-01-25 15:29:40	2024-01-25 15:36:39	100	419	TRUE	2024-01-25 15:36:40		No, I don't use LLMs for information seeking or reading	Never	No, I don't use LLMs for editing support when I am writing	Never	No, I don't use LLMs for directly writing text while I lead ideation	Never	No, I don't use LLMs for ideation and framing	Never	No, I don't use LLMs for data generation	Never	No, I don't use LLMs for data cleaning, analysis, or reporting	Never		I have not use LLMs for this type of activity	I have not use LLMs for this type of activity	I have not use LLMs for this type of activity	I have not use LLMs for this type of activity	I have not use LLMs for this type of activity	I have not use LLMs for this type of activity	Unsure / Don't Know	Unsure / Don't Know	Unsure / Don't Know	Unsure / Don't Know	Unsure / Don't Know	Unsure / Don't Know	Unsure / Don't Know	Unsure / Don't Know	Unsure / Don't Know	Unsure / Don't Know	Unsure / Don't Know	Unsure / Don't Know	Somewhat uncomfortable	Somewhat uncomfortable	Uncomfortable	Somewhat uncomfortable	Uncomfortable	Uncomfortable	Unsure / Don't Know	Unsure / Don't Know	Unsure / Don't Know	Unsure / Don't Know	Unsure / Don't Know	Unsure / Don't Know
2024-01-25 3:49:01	2024-01-25 4:10:11	100	1269	TRUE	2024-01-25 4:10:12		Yes, to generate summaries or explanations of papers or technical terms in papers	Very Rarely	Yes, to rewrite text I've written to fix grammatical issues or awkward phrasings	Frequently	No, I don't use LLMs for directly writing text while I lead ideation	Never	Yes, to come up with new ways to frame a paper, including titles and abstracts	Very Rarely	No, I don't use LLMs for data generation	Never	Yes, to conduct statistical reporting of quantitative data	Very Rarely		I have not use LLMs for this type of activity	Extremely useful	Moderately useful	Not at all useful	Slightly useful	Very useful	Not at all Risky	Slightly Risky	Very Risky	Very Risky	Extremely Risky	Moderately Risky	Acceptable	Acceptable	Acceptable	Acceptable	Unsure / Don't Know	Acceptable	Comfortable	Comfortable	Comfortable	Comfortable	Comfortable	Comfortable	Neutral	Somewhat comfortable	Somewhat uncomfortable	Somewhat uncomfortable	Comfortable	Comfortable
2023-11-16 3:04:01	2023-11-16 3:23:56	43	1195	FALSE	2023-11-23 4:35:01		No, I don't use LLMs for information seeking or reading	Never	No, I don't use LLMs for editing support when I am writing	Never	No, I don't use LLMs for directly writing text while I lead ideation	Never	No, I don't use LLMs for ideation and framing	Never	No, I don't use LLMs for data generation	Never	No, I don't use LLMs for data cleaning, analysis, or reporting	Never
2023-11-15 3:40:21	2023-11-15 3:43:02	43	161	FALSE	2023-11-22 3:43:03		No, I don't use LLMs for information seeking or reading	Very Rarely	Yes, to look up synonyms when I'm writing papers,Yes, to rewrite text I've written to fix grammatical issues or awkward phrasings	Occasionally	Yes, to shorten or summarize a long piece of text that I wrote,Yes, to draft paragraphs from ideas or bullet points,Yes, to rewrite my writing into a different style (e.g., more formal)	Very Rarely	Yes, to brainstorm research topics or questions to work on,Yes, to come up with new ways to frame a paper, including titles and abstracts,Yes, to get inspiration for methods or approaches to use for a given problem	Never	No, I don't use LLMs for data generation	Never	No, I don't use LLMs for data cleaning, analysis, or reporting	Very Rarely
2023-12-04 12:19:11	2023-12-04 12:33:15	100	843	TRUE	2023-12-04 12:33:16		No, I don't use LLMs for information seeking or reading	Never	No, I don't use LLMs for editing support when I am writing	Very Rarely	No, I don't use LLMs for directly writing text while I lead ideation	Never	No, I don't use LLMs for ideation and framing	Never	No, I don't use LLMs for data generation	Very Rarely	No, I don't use LLMs for data cleaning, analysis, or reporting	Never		Slightly useful	Moderately useful	Not at all useful	Slightly useful	Moderately useful	Not at all useful	Extremely Risky	Moderately Risky	Very Risky	Slightly Risky	Moderately Risky	Moderately Risky	Acceptable	Acceptable	Somewhat Unacceptable	Acceptable	Somewhat Acceptable	Somewhat Acceptable	Somewhat comfortable	Somewhat uncomfortable	Uncomfortable	Neutral	Neutral	Neutral	Uncomfortable	Neutral	Uncomfortable	Uncomfortable	Neutral	Neutral
2023-11-14 20:39:48	2023-11-14 20:47:23	43	454	FALSE	2023-11-21 20:47:27		Yes, to discover important topics or threads of research for literature review,Yes, to generate summaries or explanations of papers or technical terms in papers	Occasionally	Yes, to support paper formatting (e.g., LaTeX, formatting tables or formulas)	Frequently	Yes, to rewrite my writing into a different style (e.g., more formal)	Frequently	Yes, to get inspiration for methods or approaches to use for a given problem	Frequently	Yes, to automatically produce training labels given example data	Frequently	Yes, to conduct statistical reporting of quantitative data	Frequently
2024-01-25 14:34:38	2024-01-25 14:38:00	43	201	FALSE	2024-02-01 14:42:41		Yes, to discover papers to read,Yes, other:	Very Frequently	No, I don't use LLMs for editing support when I am writing	Never	Yes, to draft paragraphs from ideas or bullet points,No, I don't use LLMs for directly writing text while I lead ideation	Very Rarely	Yes, to brainstorm research topics or questions to work on	Occasionally	Yes, to automatically produce training labels given example data	Very Frequently	Yes, to conduct statistical reporting of quantitative data	Frequently
2023-11-28 9:38:04	2023-11-28 9:50:59	100	774	TRUE	2023-11-28 9:51:00		Yes, to discover important topics or threads of research for literature review	Rarely	No, I don't use LLMs for editing support when I am writing	Very Rarely	No, I don't use LLMs for directly writing text while I lead ideation	Very Rarely	Yes, to get inspiration for methods or approaches to use for a given problem	Very Rarely	No, I don't use LLMs for data generation	Never	No, I don't use LLMs for data cleaning, analysis, or reporting	Never		Extremely useful	Slightly useful	Slightly useful	Extremely useful	Slightly useful	Slightly useful	Not at all Risky	Unsure / Don't Know	Extremely Risky	Moderately Risky	Unsure / Don't Know	Unsure / Don't Know	Acceptable	Somewhat Unacceptable	Somewhat Acceptable	Acceptable	Unsure / Don't Know	Unsure / Don't Know	Comfortable	Uncomfortable	Somewhat uncomfortable	Somewhat uncomfortable	Somewhat uncomfortable	Somewhat uncomfortable	Comfortable	Unsure / Don't Know	Somewhat comfortable	Somewhat comfortable	Somewhat uncomfortable	Somewhat uncomfortable
2023-11-28 12:43:06	2023-11-28 12:47:20	57	254	FALSE	2023-12-05 12:53:26		No, I don't use LLMs for information seeking or reading	Never	Yes, to rewrite text I've written to fix grammatical issues or awkward phrasings	Frequently	No, I don't use LLMs for directly writing text while I lead ideation	Very Rarely	Yes, to brainstorm research topics or questions to work on	Never	No, I don't use LLMs for data generation	Never	Yes, to clean and reformat datasets,Yes, to conduct statistical reporting of quantitative data	Very Frequently		Very useful	Extremely useful	Extremely useful	Moderately useful	Moderately useful	Very useful	Very Risky	Moderately Risky	Moderately Risky	Not at all Risky	Not at all Risky	Not at all Risky	Acceptable	Acceptable	Somewhat Acceptable	Acceptable	Unacceptable	Acceptable	Comfortable	Comfortable	Somewhat uncomfortable	Comfortable	Somewhat uncomfortable	Comfortable	Somewhat comfortable	Comfortable	Uncomfortable	Somewhat comfortable	Somewhat uncomfortable	Comfortable
2023-11-15 9:17:32	2023-11-15 10:12:28	100	3296	TRUE	2023-11-15 10:12:29		Yes, to discover papers to read,Yes, to generate summaries or explanations of papers or technical terms in papers,Yes, to ask broad questions of the field such as current trends or important findings	Rarely	Yes, to rewrite text I've written to fix grammatical issues or awkward phrasings	Frequently	No, I don't use LLMs for directly writing text while I lead ideation	Rarely	Yes, to brainstorm research topics or questions to work on	Occasionally	No, I don't use LLMs for data generation	Never	No, I don't use LLMs for data cleaning, analysis, or reporting	Never		Very useful	Very useful	Slightly useful	Moderately useful	I have not use LLMs for this type of activity	I have not use LLMs for this type of activity	Slightly Risky	Slightly Risky	Moderately Risky	Very Risky	Unsure / Don't Know	Very Risky	Acceptable	Acceptable	Unacceptable	Acceptable	Acceptable	Somewhat Acceptable	Comfortable	Comfortable	Uncomfortable	Comfortable	Comfortable	Somewhat uncomfortable	Comfortable	Comfortable	Uncomfortable	Comfortable	Comfortable	Somewhat uncomfortable
2023-11-28 1:58:55	2023-11-28 2:04:53	100	358	TRUE	2023-11-28 2:04:55		Yes, to discover papers to read,Yes, to discover important topics or threads of research for literature review,Yes, to generate summaries or explanations of papers or technical terms in papers	Frequently	Yes, to look up synonyms when I'm writing papers,Yes, to rewrite text I've written to fix grammatical issues or awkward phrasings,Yes, to support paper formatting (e.g., LaTeX, formatting tables or formulas)	Frequently	Yes, to shorten or summarize a long piece of text that I wrote,Yes, to draft paragraphs from ideas or bullet points,Yes, to rewrite my writing into a different style (e.g., more formal)	Frequently	Yes, to brainstorm research topics or questions to work on,Yes, to come up with new ways to frame a paper, including titles and abstracts	Frequently	Yes, to generate synthetic interviews and survey responses,Yes, to automatically produce training labels given example data,Yes, to automatically produce both training examples and labels	Frequently	Yes, to clean and reformat datasets,Yes, to conduct statistical reporting of quantitative data,Yes, to conduct analysis and reporting of qualitative data (e.g., of participant interviews),Yes, to simulate human ratings of an existing dataset for evaluation (e.g., summarization quality)	Frequently		Very useful	Very useful	Extremely useful	Very useful	Very useful	Very useful	Not at all Risky	Not at all Risky	Not at all Risky	Not at all Risky	Not at all Risky	Not at all Risky	Acceptable	Acceptable	Somewhat Acceptable	Acceptable	Acceptable	Acceptable	Comfortable	Comfortable	Comfortable	Somewhat comfortable	Comfortable	Comfortable	Comfortable	Comfortable	Comfortable	Comfortable	Comfortable	Comfortable
2024-01-25 13:11:47	2024-01-25 13:16:07	100	259	TRUE	2024-01-25 13:16:08		Yes, to discover important topics or threads of research for literature review	Very Frequently	Yes, to look up synonyms when I'm writing papers,Yes, to rewrite text I've written to fix grammatical issues or awkward phrasings	Frequently	Yes, to draft paragraphs from ideas or bullet points,Yes, to rewrite my writing into a different style (e.g., more formal)	Occasionally	Yes, to brainstorm research topics or questions to work on,Yes, to come up with new ways to frame a paper, including titles and abstracts	Occasionally	No, I don't use LLMs for data generation	Rarely	No, I don't use LLMs for data cleaning, analysis, or reporting	Very Rarely		Very useful	Extremely useful	Very useful	Extremely useful	Slightly useful	Slightly useful	Slightly Risky	Not at all Risky	Slightly Risky	Moderately Risky	Extremely Risky	Extremely Risky	Acceptable	Acceptable	Acceptable	Acceptable	Acceptable	Acceptable	Comfortable	Comfortable	Comfortable	Comfortable	Comfortable	Comfortable	Comfortable	Comfortable	Comfortable	Comfortable	Comfortable	Comfortable
2024-01-25 9:55:11	2024-01-25 10:11:15	100	963	TRUE	2024-01-25 10:11:15		No, I don't use LLMs for information seeking or reading	Very Rarely	Yes, to rewrite text I've written to fix grammatical issues or awkward phrasings,Yes, other:	Occasionally	Yes, to shorten or summarize a long piece of text that I wrote,Yes, to rewrite my writing into a different style (e.g., more formal)	Occasionally	No, I don't use LLMs for ideation and framing	Never	No, I don't use LLMs for data generation	Never	No, I don't use LLMs for data cleaning, analysis, or reporting	Never		Moderately useful	Very useful	Slightly useful	Not at all useful	Not at all useful	Moderately useful	Moderately Risky	Slightly Risky	Extremely Risky	Extremely Risky	Very Risky	Slightly Risky	Neutral	Acceptable	Somewhat Unacceptable	Somewhat Unacceptable	Unacceptable	Somewhat Acceptable	Comfortable	Comfortable	Comfortable	Comfortable	Comfortable	Comfortable	Comfortable	Comfortable	Comfortable	Comfortable	Comfortable	Comfortable
2024-01-27 12:20:57	2024-01-27 12:22:59	57	121	FALSE	2024-02-03 12:22:59		No, I don't use LLMs for information seeking or reading	Never	No, I don't use LLMs for editing support when I am writing	Never	No, I don't use LLMs for directly writing text while I lead ideation	Never	No, I don't use LLMs for ideation and framing	Never	No, I don't use LLMs for data generation	Never	No, I don't use LLMs for data cleaning, analysis, or reporting	Never		I have not use LLMs for this type of activity	I have not use LLMs for this type of activity	I have not use LLMs for this type of activity	I have not use LLMs for this type of activity	I have not use LLMs for this type of activity	I have not use LLMs for this type of activity	Extremely Risky	Extremely Risky	Extremely Risky	Extremely Risky	Extremely Risky	Extremely Risky	Unacceptable	Unacceptable	Unacceptable	Unacceptable	Unacceptable	Unacceptable	Uncomfortable	Uncomfortable	Uncomfortable	Uncomfortable	Uncomfortable	Uncomfortable	Uncomfortable	Uncomfortable	Uncomfortable	Uncomfortable	Uncomfortable	Uncomfortable
2023-12-01 6:43:58	2023-12-01 6:49:19	100	320	TRUE	2023-12-01 6:49:20		Yes, to discover papers to read,Yes, to discover important topics or threads of research for literature review,Yes, to generate summaries or explanations of papers or technical terms in papers,Yes, to ask broad questions of the field such as current trends or important findings	Never	No, I don't use LLMs for editing support when I am writing	Never	No, I don't use LLMs for directly writing text while I lead ideation	Never	No, I don't use LLMs for ideation and framing	Never	No, I don't use LLMs for data generation	Never	No, I don't use LLMs for data cleaning, analysis, or reporting	Never		I have not use LLMs for this type of activity	I have not use LLMs for this type of activity	I have not use LLMs for this type of activity	I have not use LLMs for this type of activity	I have not use LLMs for this type of activity	I have not use LLMs for this type of activity	Unsure / Don't Know	Unsure / Don't Know	Unsure / Don't Know	Unsure / Don't Know	Unsure / Don't Know	Unsure / Don't Know	Unsure / Don't Know	Unsure / Don't Know	Unsure / Don't Know	Unsure / Don't Know	Unsure / Don't Know	Unsure / Don't Know	Unsure / Don't Know	Unsure / Don't Know	Unsure / Don't Know	Unsure / Don't Know	Unsure / Don't Know	Unsure / Don't Know	Unsure / Don't Know	Unsure / Don't Know	Unsure / Don't Know	Unsure / Don't Know	Unsure / Don't Know	Unsure / Don't Know
2024-01-25 17:11:36	2024-01-25 17:53:17	100	2501	TRUE	2024-01-25 17:53:18		Yes, to discover papers to read,Yes, to discover important topics or threads of research for literature review,Yes, to generate summaries or explanations of papers or technical terms in papers,Yes, to ask broad questions of the field such as current trends or important findings	Frequently	No, I don't use LLMs for editing support when I am writing	Never	No, I don't use LLMs for directly writing text while I lead ideation	Never	Yes, to get inspiration for methods or approaches to use for a given problem	Occasionally	No, I don't use LLMs for data generation	Never	No, I don't use LLMs for data cleaning, analysis, or reporting	Never		Moderately useful	I have not use LLMs for this type of activity	I have not use LLMs for this type of activity	Extremely useful	I have not use LLMs for this type of activity	I have not use LLMs for this type of activity	Not at all Risky	Not at all Risky	Extremely Risky	Slightly Risky	Not at all Risky	Not at all Risky	Acceptable	Acceptable	Unacceptable	Acceptable	Acceptable	Acceptable	Comfortable	Comfortable	Uncomfortable	Comfortable	Comfortable	Comfortable	Comfortable	Comfortable	Uncomfortable	Comfortable	Comfortable	Comfortable
2023-11-15 3:17:15	2023-11-15 3:26:58	100	582	TRUE	2023-11-15 3:26:59		Yes, to discover papers to read	Frequently	No, I don't use LLMs for editing support when I am writing	Never	No, I don't use LLMs for directly writing text while I lead ideation	Never	No, I don't use LLMs for ideation and framing	Never	No, I don't use LLMs for data generation	Never	No, I don't use LLMs for data cleaning, analysis, or reporting	Never		Very useful	Not at all useful	Not at all useful	Not at all useful	Not at all useful	Not at all useful	Slightly Risky	Extremely Risky	Extremely Risky	Extremely Risky	Extremely Risky	Extremely Risky	Neutral	Somewhat Unacceptable	Somewhat Unacceptable	Somewhat Unacceptable	Somewhat Unacceptable	Somewhat Unacceptable	Neutral	Unsure / Don't Know	Unsure / Don't Know	Unsure / Don't Know	Unsure / Don't Know	Unsure / Don't Know	Comfortable	Comfortable	Comfortable	Comfortable	Comfortable	Comfortable
2023-11-17 21:34:24	2023-11-17 22:21:17	100	2813	TRUE	2023-11-17 22:21:18		No, I don't use LLMs for information seeking or reading	Never	No, I don't use LLMs for editing support when I am writing	Never	No, I don't use LLMs for directly writing text while I lead ideation	Very Rarely	Yes, other:	Never	No, I don't use LLMs for data generation	Never	Yes, other:	Never		I have not use LLMs for this type of activity	I have not use LLMs for this type of activity	I have not use LLMs for this type of activity	I have not use LLMs for this type of activity	I have not use LLMs for this type of activity	I have not use LLMs for this type of activity		Unsure / Don't Know	Extremely Risky	Extremely Risky	Extremely Risky	Moderately Risky	Somewhat Acceptable	Neutral	Unacceptable	Acceptable	Somewhat Unacceptable	Acceptable	Somewhat comfortable	Comfortable	Unsure / Don't Know	Neutral	Neutral	Neutral	Uncomfortable	Unsure / Don't Know	Unsure / Don't Know	Neutral	Neutral	Neutral
2024-01-25 13:15:25	2024-01-25 13:28:39	100	794	TRUE	2024-01-25 13:28:40		No, I don't use LLMs for information seeking or reading	Never	No, I don't use LLMs for editing support when I am writing	Never	No, I don't use LLMs for directly writing text while I lead ideation	Never	No, I don't use LLMs for ideation and framing	Never	No, I don't use LLMs for data generation	Never	No, I don't use LLMs for data cleaning, analysis, or reporting	Never		Not at all useful	Not at all useful	Not at all useful	Not at all useful	Not at all useful	Not at all useful	Extremely Risky	Extremely Risky	Extremely Risky	Extremely Risky	Extremely Risky	Extremely Risky	Unacceptable	Unacceptable	Unacceptable	Unacceptable	Unacceptable	Unacceptable	Uncomfortable	Uncomfortable	Uncomfortable	Uncomfortable	Uncomfortable	Uncomfortable	Uncomfortable	Uncomfortable	Uncomfortable	Uncomfortable	Uncomfortable	Uncomfortable
2023-11-15 4:52:09	2023-11-15 5:04:42	43	753	FALSE	2023-11-22 5:04:43		Yes, to discover important topics or threads of research for literature review,Yes, to generate summaries or explanations of papers or technical terms in papers	Frequently	Yes, to rewrite text I've written to fix grammatical issues or awkward phrasings	Frequently	Yes, to draft paragraphs from ideas or bullet points	Never	Yes, to get inspiration for methods or approaches to use for a given problem	Occasionally	Yes, to automatically produce both training examples and labels	Frequently	Yes, to conduct analysis and reporting of qualitative data (e.g., of participant interviews)	Frequently
2023-11-30 1:36:46	2023-11-30 1:55:19	100	1112	TRUE	2023-11-30 1:55:20		Yes, to discover papers to read,Yes, to generate summaries or explanations of papers or technical terms in papers	Occasionally	Yes, to rewrite text I've written to fix grammatical issues or awkward phrasings	Occasionally	Yes, to shorten or summarize a long piece of text that I wrote,Yes, to draft paragraphs from ideas or bullet points,Yes, to rewrite my writing into a different style (e.g., more formal)	Occasionally	Yes, to brainstorm research topics or questions to work on,Yes, to get inspiration for methods or approaches to use for a given problem	Occasionally	No, I don't use LLMs for data generation	Never	Yes, to conduct analysis and reporting of qualitative data (e.g., of participant interviews)	Occasionally		Moderately useful	Very useful	Extremely useful	Very useful	I have not use LLMs for this type of activity	Moderately useful	Moderately Risky	Not at all Risky	Slightly Risky	Slightly Risky	Extremely Risky	Slightly Risky	Acceptable	Acceptable	Acceptable	Acceptable	Unacceptable	Acceptable	Comfortable	Comfortable	Comfortable	Comfortable	Uncomfortable	Comfortable	Uncomfortable	Uncomfortable	Uncomfortable	Uncomfortable	Uncomfortable	Uncomfortable
2024-01-26 5:51:06	2024-01-26 6:13:46	100	1360	TRUE	2024-01-26 6:13:47		Yes, to ask broad questions of the field such as current trends or important findings	Frequently	Yes, to rewrite text I've written to fix grammatical issues or awkward phrasings	Frequently	No, I don't use LLMs for directly writing text while I lead ideation	Rarely	Yes, to get inspiration for methods or approaches to use for a given problem	Occasionally	Yes, to generate synthetic interviews and survey responses	Rarely	Yes, to simulate human ratings of an existing dataset for evaluation (e.g., summarization quality)	Occasionally		Very useful	Very useful	Slightly useful	Slightly useful	Slightly useful	Moderately useful	Moderately Risky	Slightly Risky	Moderately Risky	Moderately Risky	Moderately Risky	Slightly Risky	Somewhat Acceptable	Acceptable	Somewhat Unacceptable	Somewhat Acceptable	Somewhat Unacceptable	Somewhat Acceptable	Comfortable	Somewhat comfortable	Somewhat comfortable	Somewhat comfortable	Somewhat comfortable	Somewhat comfortable	Somewhat comfortable	Somewhat comfortable	Somewhat comfortable	Neutral	Neutral	Neutral
2024-01-26 3:35:25	2024-01-26 3:45:52	100	627	TRUE	2024-01-26 3:45:53		No, I don't use LLMs for information seeking or reading	Never	No, I don't use LLMs for editing support when I am writing	Never	No, I don't use LLMs for directly writing text while I lead ideation	Never	No, I don't use LLMs for ideation and framing	Never	No, I don't use LLMs for data generation	Never	No, I don't use LLMs for data cleaning, analysis, or reporting	Never		I have not use LLMs for this type of activity	I have not use LLMs for this type of activity	I have not use LLMs for this type of activity	I have not use LLMs for this type of activity	I have not use LLMs for this type of activity	I have not use LLMs for this type of activity	Moderately Risky	Very Risky	Extremely Risky	Very Risky	Extremely Risky	Extremely Risky	Unacceptable	Unacceptable	Unacceptable	Unacceptable	Unacceptable	Unacceptable	Unsure / Don't Know	Unsure / Don't Know	Unsure / Don't Know	Unsure / Don't Know	Unsure / Don't Know	Unsure / Don't Know	Unsure / Don't Know	Unsure / Don't Know	Unsure / Don't Know	Unsure / Don't Know	Unsure / Don't Know	Unsure / Don't Know
2023-11-28 12:59:47	2023-11-28 13:41:34	100	2506	TRUE	2023-11-28 13:41:35		Yes, to discover important topics or threads of research for literature review,Yes, to generate summaries or explanations of papers or technical terms in papers,Yes, to ask broad questions of the field such as current trends or important findings	Frequently	Yes, to look up synonyms when I'm writing papers,Yes, to rewrite text I've written to fix grammatical issues or awkward phrasings,Yes, to support paper formatting (e.g., LaTeX, formatting tables or formulas)	Frequently	Yes, to shorten or summarize a long piece of text that I wrote,Yes, to draft paragraphs from ideas or bullet points,Yes, to rewrite my writing into a different style (e.g., more formal)	Frequently	Yes, to brainstorm research topics or questions to work on,Yes, to come up with new ways to frame a paper, including titles and abstracts,Yes, to get inspiration for methods or approaches to use for a given problem	Frequently	No, I don't use LLMs for data generation	Never	Yes, to conduct statistical reporting of quantitative data	Frequently		Very useful	Very useful	Very useful	Very useful	I have not use LLMs for this type of activity	Very useful	Moderately Risky	Slightly Risky	Moderately Risky	Moderately Risky	Unsure / Don't Know	Moderately Risky	Acceptable	Acceptable	Acceptable	Acceptable	Somewhat Acceptable	Acceptable	Comfortable	Comfortable	Somewhat comfortable	Comfortable	Uncomfortable	Comfortable	Somewhat comfortable	Comfortable	Somewhat comfortable	Somewhat comfortable		Somewhat comfortable
2024-01-25 23:52:26	2024-01-26 0:07:07	100	881	TRUE	2024-01-26 0:07:08		Yes, to generate summaries or explanations of papers or technical terms in papers	Very Rarely	Yes, to rewrite text I've written to fix grammatical issues or awkward phrasings	Very Rarely	No, I don't use LLMs for directly writing text while I lead ideation	Never	No, I don't use LLMs for ideation and framing	Never	No, I don't use LLMs for data generation	Never	No, I don't use LLMs for data cleaning, analysis, or reporting	Never		Very useful	Very useful	Not at all useful	Not at all useful	Slightly useful	Slightly useful	Not at all Risky	Not at all Risky	Moderately Risky	Very Risky	Slightly Risky	Slightly Risky	Acceptable	Acceptable	Somewhat Unacceptable	Neutral	Neutral	Neutral	Comfortable	Comfortable	Somewhat uncomfortable	Somewhat uncomfortable	Neutral	Neutral	Comfortable	Comfortable	Somewhat uncomfortable	Somewhat uncomfortable	Somewhat uncomfortable	Somewhat uncomfortable
2023-11-15 4:28:42	2023-11-15 4:35:30	100	407	TRUE	2023-11-15 4:35:31		Yes, to discover papers to read	Frequently	Yes, to rewrite text I've written to fix grammatical issues or awkward phrasings	Occasionally	Yes, to rewrite my writing into a different style (e.g., more formal)	Occasionally	Yes, to get inspiration for methods or approaches to use for a given problem	Frequently	Yes, to automatically produce training labels given example data	Occasionally	Yes, to simulate human ratings of an existing dataset for evaluation (e.g., summarization quality)	Rarely		Moderately useful	Slightly useful	Not at all useful	Slightly useful	Not at all useful	Slightly useful	Slightly Risky	Not at all Risky	Moderately Risky	Slightly Risky	Not at all Risky	Slightly Risky	Neutral	Somewhat Unacceptable	Neutral	Somewhat Unacceptable	Somewhat Unacceptable	Unacceptable	Somewhat uncomfortable	Neutral	Somewhat uncomfortable	Uncomfortable	Somewhat uncomfortable	Somewhat uncomfortable	Neutral	Somewhat uncomfortable	Somewhat uncomfortable	Uncomfortable	Somewhat uncomfortable	Somewhat uncomfortable
2024-01-25 13:00:43	2024-01-25 13:12:11	100	687	TRUE	2024-01-25 13:12:12		Yes, to generate summaries or explanations of papers or technical terms in papers,Yes, to ask broad questions of the field such as current trends or important findings,Yes, other:	Occasionally	Yes, to look up synonyms when I'm writing papers,Yes, to rewrite text I've written to fix grammatical issues or awkward phrasings,Yes, other:	Occasionally	Yes, to shorten or summarize a long piece of text that I wrote,Yes, to rewrite my writing into a different style (e.g., more formal)	Never	No, I don't use LLMs for ideation and framing	Never	No, I don't use LLMs for data generation	Never	No, I don't use LLMs for data cleaning, analysis, or reporting	Never		Moderately useful	Extremely useful	Moderately useful	I have not use LLMs for this type of activity	I have not use LLMs for this type of activity	I have not use LLMs for this type of activity	Slightly Risky	Slightly Risky	Moderately Risky	Very Risky	Extremely Risky	Extremely Risky	Acceptable	Acceptable	Acceptable	Neutral	Unacceptable	Unacceptable	Comfortable	Comfortable	Somewhat comfortable	Uncomfortable	Uncomfortable	Uncomfortable	Comfortable	Somewhat comfortable	Somewhat comfortable	Uncomfortable	Uncomfortable	Uncomfortable
2023-11-28 13:41:24	2023-11-28 13:45:54	57	269	FALSE	2023-12-05 13:45:57		No, I don't use LLMs for information seeking or reading	Never	No, I don't use LLMs for editing support when I am writing	Never	No, I don't use LLMs for directly writing text while I lead ideation	Never	No, I don't use LLMs for ideation and framing	Never	No, I don't use LLMs for data generation	Never	No, I don't use LLMs for data cleaning, analysis, or reporting	Never								Unsure / Don't Know	Unsure / Don't Know	Unsure / Don't Know	Unsure / Don't Know	Unsure / Don't Know	Unsure / Don't Know	Unsure / Don't Know	Unsure / Don't Know	Unsure / Don't Know	Unsure / Don't Know	Unsure / Don't Know	Unsure / Don't Know	Unsure / Don't Know	Unsure / Don't Know	Unsure / Don't Know	Unsure / Don't Know	Unsure / Don't Know	Unsure / Don't Know	Unsure / Don't Know	Unsure / Don't Know	Unsure / Don't Know	Unsure / Don't Know	Unsure / Don't Know	Unsure / Don't Know
2023-11-28 16:45:20	2023-11-28 16:58:39	100	798	TRUE	2023-11-28 16:58:40		Yes, to discover papers to read,Yes, to discover important topics or threads of research for literature review,Yes, to generate summaries or explanations of papers or technical terms in papers,Yes, to ask broad questions of the field such as current trends or important findings	Frequently	Yes, to look up synonyms when I'm writing papers,Yes, to rewrite text I've written to fix grammatical issues or awkward phrasings,Yes, to support paper formatting (e.g., LaTeX, formatting tables or formulas)	Rarely	Yes, to shorten or summarize a long piece of text that I wrote,Yes, to draft paragraphs from ideas or bullet points	Rarely	Yes, to get inspiration for methods or approaches to use for a given problem	Very Rarely	No, I don't use LLMs for data generation	Never	No, I don't use LLMs for data cleaning, analysis, or reporting	Never		Very useful	Very useful	Moderately useful	Very useful	I have not use LLMs for this type of activity	I have not use LLMs for this type of activity	Moderately Risky	Slightly Risky	Very Risky	Very Risky	Unsure / Don't Know	Unsure / Don't Know	Acceptable	Somewhat Acceptable	Somewhat Acceptable	Somewhat Acceptable	Unsure / Don't Know	Unsure / Don't Know	Somewhat comfortable	Somewhat comfortable	Somewhat comfortable	Somewhat comfortable	Unsure / Don't Know	Unsure / Don't Know	Neutral	Somewhat comfortable	Somewhat uncomfortable	Neutral	Unsure / Don't Know	Unsure / Don't Know
2024-01-25 3:04:45	2024-01-25 3:07:39	43	173	FALSE	2024-02-01 3:07:41		Yes, to discover important topics or threads of research for literature review	Frequently	Yes, to look up synonyms when I'm writing papers,Yes, to rewrite text I've written to fix grammatical issues or awkward phrasings,Yes, to support paper formatting (e.g., LaTeX, formatting tables or formulas)	Frequently	No, I don't use LLMs for directly writing text while I lead ideation	Very Rarely	Yes, to brainstorm research topics or questions to work on,Yes, to come up with new ways to frame a paper, including titles and abstracts,Yes, to get inspiration for methods or approaches to use for a given problem	Occasionally	Yes, to generate synthetic interviews and survey responses,Yes, to automatically produce training labels given example data	Rarely	Yes, to clean and reformat datasets,Yes, to conduct statistical reporting of quantitative data,Yes, to conduct analysis and reporting of qualitative data (e.g., of participant interviews),Yes, to simulate human ratings of an existing dataset for evaluation (e.g., summarization quality)	Occasionally
2024-01-25 11:29:01	2024-01-25 11:41:19	100	737	TRUE	2024-01-25 11:41:19		No, I don't use LLMs for information seeking or reading	Very Rarely	No, I don't use LLMs for editing support when I am writing	Never	No, I don't use LLMs for directly writing text while I lead ideation	Never	No, I don't use LLMs for ideation and framing	Never	No, I don't use LLMs for data generation	Never	No, I don't use LLMs for data cleaning, analysis, or reporting	Never		I have not use LLMs for this type of activity	I have not use LLMs for this type of activity	I have not use LLMs for this type of activity	I have not use LLMs for this type of activity	I have not use LLMs for this type of activity	I have not use LLMs for this type of activity	Unsure / Don't Know	Unsure / Don't Know	Unsure / Don't Know	Unsure / Don't Know	Unsure / Don't Know	Unsure / Don't Know	Neutral	Somewhat Unacceptable	Somewhat Unacceptable	Neutral	Somewhat Unacceptable	Neutral	Unsure / Don't Know	Unsure / Don't Know	Unsure / Don't Know	Unsure / Don't Know	Unsure / Don't Know	Unsure / Don't Know	Comfortable	Comfortable	Comfortable	Comfortable	Comfortable	Comfortable
2023-11-27 21:48:14	2023-11-27 21:58:17	57	602	FALSE	2023-12-04 21:58:23		No, I don't use LLMs for information seeking or reading	Never	No, I don't use LLMs for editing support when I am writing	Rarely	No, I don't use LLMs for directly writing text while I lead ideation	Never	No, I don't use LLMs for ideation and framing	Never	No, I don't use LLMs for data generation	Never	No, I don't use LLMs for data cleaning, analysis, or reporting	Never		I have not use LLMs for this type of activity	I have not use LLMs for this type of activity	I have not use LLMs for this type of activity	I have not use LLMs for this type of activity	I have not use LLMs for this type of activity	I have not use LLMs for this type of activity
2023-11-28 5:40:39	2023-11-28 5:52:37	100	718	TRUE	2023-11-28 5:52:38		Yes, to discover papers to read,Yes, to discover important topics or threads of research for literature review,Yes, to generate summaries or explanations of papers or technical terms in papers,Yes, to ask broad questions of the field such as current trends or important findings	Very Frequently	Yes, to look up synonyms when I'm writing papers,Yes, to rewrite text I've written to fix grammatical issues or awkward phrasings,Yes, to support paper formatting (e.g., LaTeX, formatting tables or formulas)	Very Frequently	Yes, to shorten or summarize a long piece of text that I wrote,Yes, to draft paragraphs from ideas or bullet points,Yes, to rewrite my writing into a different style (e.g., more formal)	Very Frequently	Yes, to brainstorm research topics or questions to work on,Yes, to come up with new ways to frame a paper, including titles and abstracts,Yes, to get inspiration for methods or approaches to use for a given problem	Very Frequently	Yes, to generate synthetic interviews and survey responses,Yes, to automatically produce training labels given example data,Yes, to automatically produce both training examples and labels	Very Frequently	Yes, other:	Very Frequently		Very useful	Very useful	Moderately useful	Moderately useful	Very useful	Slightly useful	Very Risky	Slightly Risky	Extremely Risky	Slightly Risky	Extremely Risky	Extremely Risky	Neutral	Somewhat Acceptable	Somewhat Unacceptable	Somewhat Acceptable	Somewhat Acceptable	Neutral	Comfortable	Comfortable	Comfortable	Comfortable	Comfortable	Comfortable	Comfortable	Somewhat uncomfortable	Comfortable	Comfortable	Comfortable	Comfortable
2024-02-08 2:22:46	2024-02-08 2:30:02	100	435	TRUE	2024-02-08 2:30:04		Yes, to discover papers to read,Yes, to generate summaries or explanations of papers or technical terms in papers	Occasionally	Yes, to look up synonyms when I'm writing papers,Yes, to rewrite text I've written to fix grammatical issues or awkward phrasings	Frequently	Yes, to shorten or summarize a long piece of text that I wrote,Yes, to rewrite my writing into a different style (e.g., more formal)	Occasionally	No, I don't use LLMs for ideation and framing	Never	No, I don't use LLMs for data generation	Never	No, I don't use LLMs for data cleaning, analysis, or reporting	Never		Very useful	Very useful	Not at all useful	Not at all useful	Slightly useful	Moderately useful	Slightly Risky	Slightly Risky	Very Risky	Extremely Risky	Very Risky	Slightly Risky	Acceptable	Acceptable	Unacceptable	Somewhat Unacceptable	Neutral	Acceptable	Comfortable	Comfortable	Somewhat uncomfortable	Somewhat uncomfortable	Neutral	Comfortable	Comfortable	Comfortable	Somewhat uncomfortable	Somewhat uncomfortable	Neutral	Comfortable
2024-01-25 9:52:42	2024-01-25 10:11:29	100	1127	TRUE	2024-01-25 10:11:30		Yes, to discover papers to read,Yes, to discover important topics or threads of research for literature review,Yes, to generate summaries or explanations of papers or technical terms in papers,Yes, other:	Very Frequently	Yes, to look up synonyms when I'm writing papers,Yes, to rewrite text I've written to fix grammatical issues or awkward phrasings,Yes, to support paper formatting (e.g., LaTeX, formatting tables or formulas)	Very Frequently	Yes, to shorten or summarize a long piece of text that I wrote,Yes, to draft paragraphs from ideas or bullet points,Yes, to rewrite my writing into a different style (e.g., more formal)	Frequently	Yes, to come up with new ways to frame a paper, including titles and abstracts	Occasionally	No, I don't use LLMs for data generation	Never	Yes, to clean and reformat datasets,Yes, to conduct statistical reporting of quantitative data,Yes, to conduct analysis and reporting of qualitative data (e.g., of participant interviews),Yes, other:	Very Rarely		Slightly useful	Extremely useful	I have not use LLMs for this type of activity	Extremely useful	I have not use LLMs for this type of activity	Very useful	Extremely Risky	Not at all Risky	Extremely Risky	Moderately Risky	Moderately Risky	Not at all Risky	Acceptable	Acceptable	Somewhat Acceptable	Acceptable	Somewhat Acceptable	Acceptable	Unsure / Don't Know	Comfortable	Comfortable	Comfortable	Unsure / Don't Know	Comfortable	Unsure / Don't Know	Comfortable	Comfortable	Comfortable	Unsure / Don't Know	Comfortable
2024-02-13 13:00:59	2024-02-13 13:18:55	100	1075	TRUE	2024-02-13 13:18:56		No, I don't use LLMs for information seeking or reading	Never	Yes, to look up synonyms when I'm writing papers	Very Rarely	Yes, to draft paragraphs from ideas or bullet points	Very Rarely	Yes, other:	Very Rarely	Yes, to automatically produce training labels given example data,Yes, other:	Very Frequently	No, I don't use LLMs for data cleaning, analysis, or reporting	Never		Slightly useful	Slightly useful	Slightly useful	Moderately useful	Extremely useful	I have not use LLMs for this type of activity	Extremely Risky	Slightly Risky	Slightly Risky	Not at all Risky	Very Risky	Extremely Risky	Acceptable	Acceptable	Acceptable	Acceptable	Somewhat Acceptable	Somewhat Unacceptable	Comfortable	Comfortable	Comfortable	Comfortable	Comfortable	Comfortable	Comfortable	Somewhat comfortable	Somewhat comfortable	Comfortable	Comfortable	Comfortable
2024-01-26 5:15:57	2024-01-26 5:22:15	100	378	TRUE	2024-01-26 5:22:16		No, I don't use LLMs for information seeking or reading	Never	No, I don't use LLMs for editing support when I am writing	Never	No, I don't use LLMs for directly writing text while I lead ideation	Never	No, I don't use LLMs for ideation and framing	Never	No, I don't use LLMs for data generation	Never	No, I don't use LLMs for data cleaning, analysis, or reporting	Never		I have not use LLMs for this type of activity	I have not use LLMs for this type of activity	I have not use LLMs for this type of activity	I have not use LLMs for this type of activity	I have not use LLMs for this type of activity	I have not use LLMs for this type of activity	Moderately Risky	Moderately Risky	Moderately Risky	Very Risky	Very Risky	Moderately Risky	Somewhat Unacceptable	Neutral	Somewhat Unacceptable	Unacceptable	Somewhat Unacceptable	Neutral	Comfortable	Comfortable	Comfortable	Comfortable	Comfortable	Comfortable	Comfortable	Comfortable	Comfortable	Comfortable	Comfortable	Comfortable
2024-01-25 12:50:41	2024-01-25 13:01:12	100	630	TRUE	2024-01-25 13:01:13		Yes, to generate summaries or explanations of papers or technical terms in papers	Occasionally	Yes, other:	Very Frequently	Yes, to shorten or summarize a long piece of text that I wrote	Never	No, I don't use LLMs for ideation and framing	Never	No, I don't use LLMs for data generation	Never	No, I don't use LLMs for data cleaning, analysis, or reporting	Never		Moderately useful	Extremely useful	Not at all useful	Not at all useful	Slightly useful	Moderately useful	Very Risky	Slightly Risky	Extremely Risky	Extremely Risky	Extremely Risky	Extremely Risky	Acceptable	Acceptable	Acceptable	Acceptable	Acceptable	Acceptable	Somewhat comfortable	Comfortable	Uncomfortable	Uncomfortable	Uncomfortable	Uncomfortable	Comfortable	Comfortable	Uncomfortable	Uncomfortable	Uncomfortable	Uncomfortable
2023-11-16 10:07:53	2023-11-16 10:31:27	100	1413	TRUE	2023-11-16 10:31:27		Yes, to discover important topics or threads of research for literature review,Yes, to ask broad questions of the field such as current trends or important findings	Occasionally	Yes, to rewrite text I've written to fix grammatical issues or awkward phrasings	Frequently	Yes, to shorten or summarize a long piece of text that I wrote,Yes, to draft paragraphs from ideas or bullet points	Frequently	Yes, to come up with new ways to frame a paper, including titles and abstracts,Yes, to get inspiration for methods or approaches to use for a given problem	Occasionally	Yes, to automatically produce training labels given example data,Yes, to automatically produce both training examples and labels	Frequently	Yes, to clean and reformat datasets,Yes, to conduct analysis and reporting of qualitative data (e.g., of participant interviews),Yes, to simulate human ratings of an existing dataset for evaluation (e.g., summarization quality)	Frequently		Very useful	Extremely useful	Slightly useful	Very useful	Very useful	Extremely useful	Slightly Risky	Slightly Risky	Not at all Risky	Not at all Risky	Not at all Risky	Not at all Risky	Acceptable	Somewhat Unacceptable	Acceptable	Neutral	Somewhat Acceptable	Somewhat Acceptable	Comfortable	Comfortable	Neutral	Neutral	Neutral	Somewhat comfortable	Neutral	Neutral	Somewhat comfortable	Comfortable	Comfortable	Comfortable
2024-01-25 11:27:48	2024-01-25 11:44:54	100	1026	TRUE	2024-01-25 11:44:55		Yes, to discover papers to read	Occasionally	Yes, to look up synonyms when I'm writing papers,Yes, to rewrite text I've written to fix grammatical issues or awkward phrasings	Occasionally	Yes, to shorten or summarize a long piece of text that I wrote	Never	No, I don't use LLMs for ideation and framing	Never	No, I don't use LLMs for data generation	Never	No, I don't use LLMs for data cleaning, analysis, or reporting	Never		Moderately useful	Extremely useful	Not at all useful	Not at all useful	Not at all useful	Not at all useful	Very Risky	Slightly Risky	Extremely Risky	Extremely Risky	Extremely Risky	Extremely Risky	Acceptable	Acceptable	Unacceptable	Acceptable	Unsure / Don't Know	Somewhat Acceptable	Comfortable	Comfortable	Uncomfortable	Comfortable	Unsure / Don't Know	Comfortable	Comfortable	Comfortable	Uncomfortable	Somewhat uncomfortable	Unsure / Don't Know	Unsure / Don't Know
2024-01-26 16:40:32	2024-01-26 16:53:46	100	794	TRUE	2024-01-26 16:53:47		No, I don't use LLMs for information seeking or reading	Never	No, I don't use LLMs for editing support when I am writing	Never	No, I don't use LLMs for directly writing text while I lead ideation	Never	No, I don't use LLMs for ideation and framing	Never	No, I don't use LLMs for data generation	Never	No, I don't use LLMs for data cleaning, analysis, or reporting	Never		I have not use LLMs for this type of activity	I have not use LLMs for this type of activity	I have not use LLMs for this type of activity	I have not use LLMs for this type of activity	I have not use LLMs for this type of activity	I have not use LLMs for this type of activity	Very Risky	Unsure / Don't Know	Very Risky	Very Risky	Very Risky	Very Risky	Unsure / Don't Know	Unsure / Don't Know	Unacceptable	Unacceptable	Unacceptable	Unacceptable	Unsure / Don't Know	Unsure / Don't Know	Unsure / Don't Know	Unsure / Don't Know	Unsure / Don't Know	Unsure / Don't Know	Unsure / Don't Know	Unsure / Don't Know	Unsure / Don't Know	Uncomfortable	Uncomfortable	Uncomfortable
2024-01-28 4:23:23	2024-01-28 4:41:43	71	1099	FALSE	2024-02-04 4:41:45		No, I don't use LLMs for information seeking or reading	Very Rarely	Yes, to look up synonyms when I'm writing papers,Yes, to rewrite text I've written to fix grammatical issues or awkward phrasings	Frequently	No, I don't use LLMs for directly writing text while I lead ideation	Never	Yes, to brainstorm research topics or questions to work on	Frequently	No, I don't use LLMs for data generation	Never	No, I don't use LLMs for data cleaning, analysis, or reporting	Never		Slightly useful	Very useful	Not at all useful	Slightly useful	I have not use LLMs for this type of activity	I have not use LLMs for this type of activity	Very Risky	Moderately Risky	Extremely Risky	Very Risky	Unsure / Don't Know	Unsure / Don't Know	Acceptable	Acceptable	Neutral	Acceptable	Acceptable	Acceptable	Neutral	Somewhat uncomfortable	Somewhat uncomfortable	Comfortable	Comfortable	Comfortable	Somewhat uncomfortable	Somewhat uncomfortable	Uncomfortable	Neutral	Uncomfortable	Uncomfortable
2024-01-25 3:30:38	2024-01-25 8:06:08	43	16530	FALSE	2024-02-01 8:06:16		Yes, to discover papers to read,Yes, to ask broad questions of the field such as current trends or important findings	Occasionally	Yes, to rewrite text I've written to fix grammatical issues or awkward phrasings	Never	No, I don't use LLMs for directly writing text while I lead ideation	Never	Yes, to come up with new ways to frame a paper, including titles and abstracts	Very Rarely	No, I don't use LLMs for data generation	Never	No, I don't use LLMs for data cleaning, analysis, or reporting	Never
2024-01-25 9:39:25	2024-01-25 9:52:25	100	779	TRUE	2024-01-25 9:52:26		Yes, to generate summaries or explanations of papers or technical terms in papers,Yes, to ask broad questions of the field such as current trends or important findings	Very Rarely	Yes, to rewrite text I've written to fix grammatical issues or awkward phrasings	Frequently	Yes, to rewrite my writing into a different style (e.g., more formal)	Very Frequently	Yes, to come up with new ways to frame a paper, including titles and abstracts,Yes, to get inspiration for methods or approaches to use for a given problem	Very Frequently	No, I don't use LLMs for data generation	Never	Yes, to clean and reformat datasets,Yes, to conduct statistical reporting of quantitative data,Yes, to conduct analysis and reporting of qualitative data (e.g., of participant interviews)	Very Frequently		Slightly useful	Extremely useful	Moderately useful	Very useful	Slightly useful	Extremely useful	Extremely Risky	Moderately Risky	Very Risky	Slightly Risky	Unsure / Don't Know	Moderately Risky	Acceptable	Somewhat Acceptable	Acceptable	Somewhat Acceptable	Acceptable	Somewhat Acceptable	Comfortable	Somewhat comfortable	Comfortable	Comfortable	Comfortable	Comfortable	Comfortable	Comfortable	Comfortable	Comfortable	Comfortable	Comfortable
2024-01-25 9:49:44	2024-01-25 10:05:35	100	951	TRUE	2024-01-25 10:05:36		No, I don't use LLMs for information seeking or reading	Never	No, I don't use LLMs for editing support when I am writing	Never	No, I don't use LLMs for directly writing text while I lead ideation	Never	No, I don't use LLMs for ideation and framing	Never	No, I don't use LLMs for data generation	Never	No, I don't use LLMs for data cleaning, analysis, or reporting	Never		Not at all useful	I have not use LLMs for this type of activity	I have not use LLMs for this type of activity	I have not use LLMs for this type of activity	I have not use LLMs for this type of activity	I have not use LLMs for this type of activity	Extremely Risky	Extremely Risky	Extremely Risky	Extremely Risky	Slightly Risky	Slightly Risky	Acceptable	Neutral	Unacceptable	Neutral	Neutral	Unacceptable	Comfortable	Comfortable	Comfortable	Comfortable	Comfortable	Comfortable	Comfortable	Comfortable	Comfortable	Comfortable	Comfortable	Comfortable
2024-01-25 20:08:30	2024-01-25 20:47:35	100	2344	TRUE	2024-01-25 20:47:36		No, I don't use LLMs for information seeking or reading	Never	No, I don't use LLMs for editing support when I am writing	Never	Yes, to rewrite my writing into a different style (e.g., more formal)	Occasionally	Yes, to come up with new ways to frame a paper, including titles and abstracts	Rarely	No, I don't use LLMs for data generation	Never	No, I don't use LLMs for data cleaning, analysis, or reporting	Never		I have not use LLMs for this type of activity	Moderately useful	I have not use LLMs for this type of activity	I have not use LLMs for this type of activity	I have not use LLMs for this type of activity	Slightly useful	Very Risky	Slightly Risky	Moderately Risky	Extremely Risky	Extremely Risky	Moderately Risky	Acceptable	Acceptable	Neutral	Neutral	Neutral	Acceptable	Comfortable	Comfortable	Comfortable	Comfortable	Comfortable	Comfortable	Comfortable	Comfortable	Comfortable	Comfortable	Comfortable	Comfortable
2024-01-25 20:30:49	2024-01-25 20:41:05	100	615	TRUE	2024-01-25 20:41:08		Yes, to discover papers to read,Yes, to discover important topics or threads of research for literature review,Yes, to generate summaries or explanations of papers or technical terms in papers	Occasionally	Yes, to look up synonyms when I'm writing papers,Yes, to rewrite text I've written to fix grammatical issues or awkward phrasings,Yes, to support paper formatting (e.g., LaTeX, formatting tables or formulas)	Frequently	Yes, to rewrite my writing into a different style (e.g., more formal)	Never	No, I don't use LLMs for ideation and framing	Never	No, I don't use LLMs for data generation	Never	No, I don't use LLMs for data cleaning, analysis, or reporting	Never		Very useful	Very useful	Not at all useful	Not at all useful	Not at all useful	Not at all useful	Extremely Risky	Not at all Risky	Extremely Risky	Extremely Risky	Extremely Risky	Extremely Risky	Acceptable	Acceptable	Acceptable	Neutral	Unacceptable	Neutral	Comfortable	Comfortable	Uncomfortable	Uncomfortable	Uncomfortable	Uncomfortable	Comfortable	Comfortable	Uncomfortable	Uncomfortable	Uncomfortable	Uncomfortable
2024-01-25 4:21:48	2024-01-25 4:40:48	100	1139	TRUE	2024-01-25 4:40:48		No, I don't use LLMs for information seeking or reading	Never	Yes, to look up synonyms when I'm writing papers,Yes, to rewrite text I've written to fix grammatical issues or awkward phrasings,Yes, other:	Very Frequently	Yes, to shorten or summarize a long piece of text that I wrote,Yes, to rewrite my writing into a different style (e.g., more formal)	Very Rarely	No, I don't use LLMs for ideation and framing	Never	No, I don't use LLMs for data generation	Never	No, I don't use LLMs for data cleaning, analysis, or reporting	Never		I have not use LLMs for this type of activity	Very useful	I have not use LLMs for this type of activity	I have not use LLMs for this type of activity	I have not use LLMs for this type of activity	I have not use LLMs for this type of activity	Moderately Risky	Not at all Risky	Slightly Risky	Slightly Risky	Unsure / Don't Know	Unsure / Don't Know	Acceptable	Acceptable	Somewhat Acceptable	Somewhat Acceptable	Somewhat Acceptable	Somewhat Acceptable	Comfortable	Comfortable	Neutral	Neutral	Neutral	Neutral	Comfortable	Comfortable	Neutral	Neutral	Neutral	Neutral
2024-02-02 1:48:33	2024-02-02 2:32:05	100	2612	TRUE	2024-02-02 2:32:06		No, I don't use LLMs for information seeking or reading	Very Rarely	Yes, to rewrite text I've written to fix grammatical issues or awkward phrasings	Very Rarely	No, I don't use LLMs for directly writing text while I lead ideation	Never	Yes, to brainstorm research topics or questions to work on	Very Rarely	No, I don't use LLMs for data generation	Never	No, I don't use LLMs for data cleaning, analysis, or reporting	Never		Slightly useful	Moderately useful	Not at all useful	Slightly useful	Not at all useful	Not at all useful	Slightly Risky	Extremely Risky	Extremely Risky	Moderately Risky	Extremely Risky	Extremely Risky	Acceptable	Acceptable	Unacceptable	Somewhat Acceptable	Unacceptable	Somewhat Unacceptable	Comfortable	Comfortable	Comfortable	Comfortable	Comfortable	Comfortable	Comfortable	Comfortable	Comfortable	Comfortable	Comfortable	Comfortable
2024-01-26 12:06:19	2024-01-26 12:15:45	100	565	TRUE	2024-01-26 12:15:46		Yes, to discover papers to read,Yes, to generate summaries or explanations of papers or technical terms in papers	Frequently	Yes, to rewrite text I've written to fix grammatical issues or awkward phrasings	Frequently	Yes, to draft paragraphs from ideas or bullet points	Frequently	Yes, to brainstorm research topics or questions to work on	Occasionally	Yes, to automatically produce training labels given example data,Yes, to automatically produce both training examples and labels	Occasionally	No, I don't use LLMs for data cleaning, analysis, or reporting	Never		Extremely useful	Extremely useful	Extremely useful	Extremely useful	Very useful	Moderately useful	Moderately Risky	Moderately Risky	Moderately Risky	Moderately Risky	Extremely Risky	Unsure / Don't Know	Acceptable	Acceptable	Acceptable	Acceptable	Acceptable	Unsure / Don't Know	Comfortable	Comfortable	Comfortable	Comfortable	Comfortable	Unsure / Don't Know	Comfortable	Comfortable	Comfortable	Comfortable	Comfortable	Unsure / Don't Know
2024-02-21 8:02:07	2024-02-21 8:21:02	100	1134	TRUE	2024-02-21 8:21:04		No, I don't use LLMs for information seeking or reading	Never	No, I don't use LLMs for editing support when I am writing	Never	No, I don't use LLMs for directly writing text while I lead ideation	Never	No, I don't use LLMs for ideation and framing	Never	Yes, to automatically produce both training examples and labels	Very Rarely	No, I don't use LLMs for data cleaning, analysis, or reporting	Never		I have not use LLMs for this type of activity	I have not use LLMs for this type of activity	I have not use LLMs for this type of activity	I have not use LLMs for this type of activity	Very useful	I have not use LLMs for this type of activity	Very Risky	Moderately Risky	Slightly Risky	Slightly Risky	Moderately Risky	Extremely Risky	Somewhat Acceptable	Acceptable	Acceptable	Acceptable	Somewhat Acceptable	Neutral	Comfortable	Comfortable	Comfortable	Comfortable	Comfortable	Comfortable	Comfortable	Comfortable	Comfortable	Comfortable	Comfortable	Comfortable
2024-01-25 9:55:29	2024-01-25 10:06:40	100	670	TRUE	2024-01-25 10:06:44		Yes, to discover important topics or threads of research for literature review,Yes, to ask broad questions of the field such as current trends or important findings,Yes, other:	Rarely	Yes, to look up synonyms when I'm writing papers,Yes, to rewrite text I've written to fix grammatical issues or awkward phrasings	Never	No, I don't use LLMs for directly writing text while I lead ideation	Never	No, I don't use LLMs for ideation and framing	Never	No, I don't use LLMs for data generation	Never	No, I don't use LLMs for data cleaning, analysis, or reporting	Never		Moderately useful	Moderately useful	I have not use LLMs for this type of activity	I have not use LLMs for this type of activity	I have not use LLMs for this type of activity	I have not use LLMs for this type of activity	Moderately Risky	Slightly Risky	Extremely Risky	Extremely Risky	Extremely Risky	Extremely Risky	Acceptable	Acceptable	Unacceptable	Acceptable	Unsure / Don't Know	Acceptable	Comfortable	Comfortable	Uncomfortable	Neutral	Unsure / Don't Know	Unsure / Don't Know	Comfortable	Comfortable	Uncomfortable	Neutral	Unsure / Don't Know	Unsure / Don't Know
2024-01-25 9:40:03	2024-01-25 10:15:03	100	2100	TRUE	2024-01-25 10:15:04		Yes, other:	Never	Yes, to look up synonyms when I'm writing papers,Yes, to rewrite text I've written to fix grammatical issues or awkward phrasings,Yes, to support paper formatting (e.g., LaTeX, formatting tables or formulas)	Occasionally	No, I don't use LLMs for directly writing text while I lead ideation	Never	Yes, to get inspiration for methods or approaches to use for a given problem	Very Rarely	No, I don't use LLMs for data generation	Never	No, I don't use LLMs for data cleaning, analysis, or reporting	Never		I have not use LLMs for this type of activity	Extremely useful	Not at all useful	Slightly useful	I have not use LLMs for this type of activity	I have not use LLMs for this type of activity	Moderately Risky	Not at all Risky	Extremely Risky	Moderately Risky	Extremely Risky	Moderately Risky	Acceptable	Acceptable	Unacceptable	Neutral	Somewhat Unacceptable	Somewhat Unacceptable	Uncomfortable	Somewhat comfortable	Uncomfortable	Somewhat uncomfortable	Uncomfortable	Uncomfortable	Uncomfortable	Uncomfortable	Uncomfortable	Uncomfortable	Uncomfortable	Uncomfortable
2024-03-07 19:17:32	2024-03-07 19:36:20	100	1128	TRUE	2024-03-07 19:36:21		Yes, to discover papers to read,Yes, to discover important topics or threads of research for literature review	Frequently	Yes, to look up synonyms when I'm writing papers,Yes, to rewrite text I've written to fix grammatical issues or awkward phrasings,Yes, to support paper formatting (e.g., LaTeX, formatting tables or formulas),Yes, other:	Very Frequently	Yes, other:	Never	Yes, other:	Never	No, I don't use LLMs for data generation	Never	Yes, to simulate human ratings of an existing dataset for evaluation (e.g., summarization quality)	Very Rarely			Extremely useful	Not at all useful	Not at all useful	Not at all useful	Slightly useful	Not at all Risky	Not at all Risky	Extremely Risky	Not at all Risky	Slightly Risky	Slightly Risky	Acceptable	Acceptable	Somewhat Acceptable	Neutral	Somewhat Unacceptable	Unacceptable	Comfortable	Comfortable	Neutral	Neutral	Neutral	Neutral	Comfortable	Comfortable	Neutral	Neutral	Somewhat uncomfortable	Neutral
2024-01-25 2:13:44	2024-01-25 2:19:47	43	363	FALSE	2024-02-01 2:19:50		Yes, to discover papers to read	Frequently	Yes, to look up synonyms when I'm writing papers	Frequently	Yes, to draft paragraphs from ideas or bullet points	Frequently	Yes, to get inspiration for methods or approaches to use for a given problem	Occasionally	Yes, to automatically produce both training examples and labels	Occasionally	Yes, to clean and reformat datasets	Frequently
2024-01-26 2:18:54	2024-01-26 5:42:52	100	12238	TRUE	2024-01-26 5:42:53		Yes, to discover papers to read,Yes, to discover important topics or threads of research for literature review,Yes, to generate summaries or explanations of papers or technical terms in papers	Frequently	Yes, to look up synonyms when I'm writing papers,Yes, to rewrite text I've written to fix grammatical issues or awkward phrasings	Frequently	Yes, to shorten or summarize a long piece of text that I wrote,Yes, to draft paragraphs from ideas or bullet points	Very Rarely	Yes, to come up with new ways to frame a paper, including titles and abstracts,Yes, to get inspiration for methods or approaches to use for a given problem	Occasionally	No, I don't use LLMs for data generation	Never	No, I don't use LLMs for data cleaning, analysis, or reporting	Never		Very useful	Moderately useful	Slightly useful	Moderately useful	I have not use LLMs for this type of activity	I have not use LLMs for this type of activity	Moderately Risky	Moderately Risky	Very Risky	Slightly Risky	Extremely Risky	Extremely Risky	Acceptable	Acceptable	Acceptable	Acceptable	Neutral	Neutral	Comfortable	Comfortable	Comfortable	Comfortable	Unsure / Don't Know	Unsure / Don't Know	Comfortable	Comfortable	Comfortable	Comfortable	Unsure / Don't Know	Unsure / Don't Know
2024-01-26 10:50:22	2024-01-26 11:02:45	57	743	FALSE	2024-02-02 11:02:55		No, I don't use LLMs for information seeking or reading	Never	No, I don't use LLMs for editing support when I am writing	Never	No, I don't use LLMs for directly writing text while I lead ideation	Never	No, I don't use LLMs for ideation and framing	Never	No, I don't use LLMs for data generation	Never	No, I don't use LLMs for data cleaning, analysis, or reporting	Never		I have not use LLMs for this type of activity	I have not use LLMs for this type of activity	I have not use LLMs for this type of activity	I have not use LLMs for this type of activity	I have not use LLMs for this type of activity	I have not use LLMs for this type of activity	Unsure / Don't Know	Unsure / Don't Know	Unsure / Don't Know	Unsure / Don't Know	Unsure / Don't Know	Unsure / Don't Know	Unsure / Don't Know	Unsure / Don't Know	Unsure / Don't Know	Unsure / Don't Know	Unsure / Don't Know	Unsure / Don't Know	Unsure / Don't Know	Unsure / Don't Know	Unsure / Don't Know	Unsure / Don't Know	Unsure / Don't Know	Unsure / Don't Know	Unsure / Don't Know	Unsure / Don't Know	Unsure / Don't Know	Unsure / Don't Know	Unsure / Don't Know	Unsure / Don't Know
2024-01-25 3:48:34	2024-01-25 3:54:33	100	358	TRUE	2024-01-25 3:54:34		No, I don't use LLMs for information seeking or reading	Never	No, I don't use LLMs for editing support when I am writing	Never	No, I don't use LLMs for directly writing text while I lead ideation	Never	No, I don't use LLMs for ideation and framing	Never	No, I don't use LLMs for data generation	Never	No, I don't use LLMs for data cleaning, analysis, or reporting	Never		I have not use LLMs for this type of activity	I have not use LLMs for this type of activity	I have not use LLMs for this type of activity	I have not use LLMs for this type of activity	I have not use LLMs for this type of activity	I have not use LLMs for this type of activity	Unsure / Don't Know	Unsure / Don't Know	Unsure / Don't Know	Unsure / Don't Know	Unsure / Don't Know	Unsure / Don't Know	Unsure / Don't Know	Unsure / Don't Know	Unsure / Don't Know	Unsure / Don't Know	Unsure / Don't Know	Unsure / Don't Know	Unsure / Don't Know	Unsure / Don't Know	Unsure / Don't Know	Unsure / Don't Know	Unsure / Don't Know	Unsure / Don't Know	Unsure / Don't Know	Unsure / Don't Know	Unsure / Don't Know	Unsure / Don't Know	Unsure / Don't Know	Unsure / Don't Know
2023-12-05 18:09:14	2023-12-05 18:45:40	100	2185	TRUE	2023-12-05 18:45:41		Yes, to discover important topics or threads of research for literature review,Yes, to generate summaries or explanations of papers or technical terms in papers	Very Rarely	No, I don't use LLMs for editing support when I am writing	Never	No, I don't use LLMs for directly writing text while I lead ideation	Never	No, I don't use LLMs for ideation and framing	Never	No, I don't use LLMs for data generation	Never	No, I don't use LLMs for data cleaning, analysis, or reporting	Never		Slightly useful	Slightly useful	I have not use LLMs for this type of activity	I have not use LLMs for this type of activity	I have not use LLMs for this type of activity	I have not use LLMs for this type of activity	Slightly Risky	Slightly Risky	Unsure / Don't Know	Moderately Risky	Very Risky	Very Risky	Somewhat Acceptable	Acceptable	Unacceptable	Somewhat Acceptable	Somewhat Unacceptable	Somewhat Unacceptable	Comfortable	Comfortable	Comfortable	Comfortable	Comfortable	Comfortable	Comfortable	Comfortable	Comfortable	Comfortable	Comfortable	Comfortable
2024-01-25 15:27:22	2024-01-25 15:33:56	100	394	TRUE	2024-01-25 15:33:57		No, I don't use LLMs for information seeking or reading	Never	No, I don't use LLMs for editing support when I am writing	Never	No, I don't use LLMs for directly writing text while I lead ideation	Never	No, I don't use LLMs for ideation and framing	Never	Yes, to automatically produce training labels given example data	Occasionally	No, I don't use LLMs for data cleaning, analysis, or reporting	Never		Not at all useful	Not at all useful	Not at all useful	Not at all useful	Moderately useful	Not at all useful	Extremely Risky	Extremely Risky	Extremely Risky	Extremely Risky	Moderately Risky	Extremely Risky	Somewhat Acceptable	Somewhat Acceptable	Unacceptable	Neutral	Somewhat Acceptable	Somewhat Unacceptable	Unsure / Don't Know	Unsure / Don't Know	Unsure / Don't Know	Unsure / Don't Know	Unsure / Don't Know	Unsure / Don't Know	Unsure / Don't Know	Unsure / Don't Know	Unsure / Don't Know	Unsure / Don't Know	Unsure / Don't Know	Unsure / Don't Know
2023-11-28 2:15:45	2023-11-28 2:31:21	100	935	TRUE	2023-11-28 2:31:22		Yes, to discover important topics or threads of research for literature review	Occasionally	Yes, to support paper formatting (e.g., LaTeX, formatting tables or formulas)	Frequently	Yes, to draft paragraphs from ideas or bullet points	Very Rarely	Yes, to brainstorm research topics or questions to work on	Never	Yes, to generate synthetic interviews and survey responses	Rarely	Yes, to clean and reformat datasets	Rarely		Extremely useful	Extremely useful	Extremely useful	Extremely useful	Extremely useful	Extremely useful	Not at all Risky	Unsure / Don't Know	Unsure / Don't Know	Not at all Risky	Not at all Risky	Slightly Risky	Somewhat Unacceptable	Neutral	Somewhat Acceptable	Somewhat Acceptable	Neutral	Neutral	Neutral	Neutral	Somewhat comfortable	Somewhat comfortable	Somewhat comfortable	Neutral	Somewhat comfortable	Somewhat comfortable	Somewhat comfortable	Somewhat comfortable	Somewhat comfortable	Somewhat comfortable
2024-01-26 4:39:23	2024-01-26 6:37:12	100	7068	TRUE	2024-01-26 6:37:13		Yes, to ask broad questions of the field such as current trends or important findings	Very Rarely	Yes, to look up synonyms when I'm writing papers,Yes, to rewrite text I've written to fix grammatical issues or awkward phrasings,Yes, to support paper formatting (e.g., LaTeX, formatting tables or formulas)	Very Frequently	Yes, to shorten or summarize a long piece of text that I wrote,Yes, to rewrite my writing into a different style (e.g., more formal)	Occasionally	Yes, to come up with new ways to frame a paper, including titles and abstracts	Occasionally	No, I don't use LLMs for data generation	Never	No, I don't use LLMs for data cleaning, analysis, or reporting	Never		Moderately useful	Extremely useful	Extremely useful	Moderately useful	Slightly useful	Moderately useful	Extremely Risky	Slightly Risky	Slightly Risky	Moderately Risky	Very Risky	Very Risky	Acceptable	Acceptable	Somewhat Acceptable	Neutral	Somewhat Acceptable	Somewhat Acceptable	Somewhat comfortable	Somewhat comfortable	Somewhat comfortable	Somewhat comfortable	Somewhat uncomfortable	Neutral	Neutral	Somewhat comfortable	Neutral	Neutral	Somewhat uncomfortable	Somewhat uncomfortable
2024-01-26 15:17:46	2024-01-26 15:43:40	100	1553	TRUE	2024-01-26 15:43:41		Yes, to discover papers to read,Yes, to discover important topics or threads of research for literature review,Yes, to generate summaries or explanations of papers or technical terms in papers	Frequently	Yes, to look up synonyms when I'm writing papers,Yes, to rewrite text I've written to fix grammatical issues or awkward phrasings	Occasionally	No, I don't use LLMs for directly writing text while I lead ideation	Never	No, I don't use LLMs for ideation and framing	Never	No, I don't use LLMs for data generation	Never	Yes, to conduct statistical reporting of quantitative data	Rarely		Extremely useful	Very useful	I have not use LLMs for this type of activity	I have not use LLMs for this type of activity	I have not use LLMs for this type of activity	Moderately useful	Moderately Risky	Slightly Risky	Very Risky	Unsure / Don't Know	Unsure / Don't Know	Moderately Risky	Acceptable	Acceptable	Somewhat Unacceptable	Somewhat Acceptable	Somewhat Unacceptable	Neutral	Comfortable	Somewhat comfortable	Somewhat uncomfortable	Neutral	Somewhat uncomfortable	Somewhat comfortable	Neutral	Somewhat uncomfortable	Uncomfortable	Uncomfortable	Unsure / Don't Know	Somewhat uncomfortable
2023-12-04 19:46:43	2023-12-04 19:51:47	100	303	TRUE	2023-12-04 19:51:48		No, I don't use LLMs for information seeking or reading	Never	Yes, to look up synonyms when I'm writing papers	Very Rarely	No, I don't use LLMs for directly writing text while I lead ideation	Never	No, I don't use LLMs for ideation and framing	Never	No, I don't use LLMs for data generation	Never	No, I don't use LLMs for data cleaning, analysis, or reporting	Never		I have not use LLMs for this type of activity	Slightly useful	I have not use LLMs for this type of activity	I have not use LLMs for this type of activity	I have not use LLMs for this type of activity	I have not use LLMs for this type of activity	Very Risky	Slightly Risky	Extremely Risky	Extremely Risky	Extremely Risky	Unsure / Don't Know	Somewhat Acceptable	Somewhat Acceptable	Somewhat Unacceptable	Somewhat Unacceptable	Somewhat Unacceptable	Unacceptable	Comfortable	Comfortable	Comfortable	Comfortable	Comfortable	Comfortable	Comfortable	Comfortable	Comfortable	Comfortable	Comfortable	Comfortable
2023-11-28 14:33:39	2023-11-28 14:57:57	100	1457	TRUE	2023-11-28 14:57:58		Yes, other:	Rarely	No, I don't use LLMs for editing support when I am writing	Never	No, I don't use LLMs for directly writing text while I lead ideation	Never	No, I don't use LLMs for ideation and framing	Never	No, I don't use LLMs for data generation	Never	Yes, other:	Never		Slightly useful	Slightly useful	Not at all useful	Not at all useful	Not at all useful	Not at all useful	Unsure / Don't Know	Very Risky	Extremely Risky	Extremely Risky	Extremely Risky	Extremely Risky		Somewhat Acceptable	Unacceptable	Unacceptable	Unacceptable	Somewhat Acceptable	Uncomfortable	Uncomfortable	Uncomfortable	Uncomfortable	Uncomfortable	Neutral	Comfortable	Uncomfortable	Uncomfortable	Uncomfortable	Uncomfortable	Somewhat comfortable
2023-11-28 6:27:17	2023-11-28 7:42:36	100	4519	TRUE	2023-11-28 7:42:37		No, I don't use LLMs for information seeking or reading	Occasionally	No, I don't use LLMs for editing support when I am writing	Occasionally	No, I don't use LLMs for directly writing text while I lead ideation	Occasionally	No, I don't use LLMs for ideation and framing	Occasionally	No, I don't use LLMs for data generation	Occasionally	No, I don't use LLMs for data cleaning, analysis, or reporting	Never		Very useful	Not at all useful	Not at all useful	Moderately useful	Moderately useful	Moderately useful	Moderately Risky	Moderately Risky	Moderately Risky	Slightly Risky	Slightly Risky	Slightly Risky	Unacceptable	Unacceptable	Unacceptable	Unacceptable	Unacceptable	Unacceptable	Neutral	Neutral	Neutral	Neutral	Neutral	Neutral	Somewhat uncomfortable	Neutral	Neutral	Somewhat comfortable	Neutral	Somewhat comfortable
2023-11-28 12:47:15	2023-11-28 12:57:58	100	642	TRUE	2023-11-28 12:57:59		Yes, to discover papers to read	Rarely	Yes, to rewrite text I've written to fix grammatical issues or awkward phrasings	Rarely	Yes, to rewrite my writing into a different style (e.g., more formal)	Rarely	No, I don't use LLMs for ideation and framing	Rarely	No, I don't use LLMs for data generation	Never	Yes, to clean and reformat datasets	Rarely		Moderately useful	Moderately useful	Moderately useful	Very useful	Moderately useful	Very useful	Moderately Risky	Moderately Risky	Moderately Risky	Moderately Risky	Moderately Risky	Moderately Risky	Somewhat Unacceptable	Somewhat Unacceptable	Somewhat Unacceptable	Somewhat Unacceptable	Somewhat Unacceptable	Somewhat Unacceptable	Somewhat uncomfortable	Somewhat uncomfortable	Somewhat uncomfortable	Somewhat uncomfortable	Somewhat uncomfortable	Somewhat uncomfortable	Neutral	Neutral	Neutral	Neutral	Neutral	Neutral
2024-01-25 22:03:47	2024-01-25 22:14:29	100	641	TRUE	2024-01-25 22:14:29		Yes, to generate summaries or explanations of papers or technical terms in papers,Yes, to ask broad questions of the field such as current trends or important findings	Frequently	Yes, to rewrite text I've written to fix grammatical issues or awkward phrasings	Occasionally	Yes, to shorten or summarize a long piece of text that I wrote,Yes, to draft paragraphs from ideas or bullet points	Occasionally	Yes, to brainstorm research topics or questions to work on,Yes, to come up with new ways to frame a paper, including titles and abstracts,Yes, to get inspiration for methods or approaches to use for a given problem	Frequently	No, I don't use LLMs for data generation	Never	Yes, to conduct analysis and reporting of qualitative data (e.g., of participant interviews)	Occasionally		Very useful	Very useful	Moderately useful	Very useful	Not at all useful	Very useful	Slightly Risky	Not at all Risky	Moderately Risky	Not at all Risky	Moderately Risky	Slightly Risky	Acceptable	Acceptable	Acceptable	Acceptable	Acceptable	Acceptable	Comfortable	Comfortable	Comfortable	Comfortable	Comfortable	Comfortable	Neutral	Neutral	Neutral	Neutral	Neutral	Neutral
2023-11-28 22:29:19	2023-11-28 22:42:47	100	808	TRUE	2023-11-28 22:42:48		Yes, to discover papers to read,Yes, to discover important topics or threads of research for literature review	Occasionally	No, I don't use LLMs for editing support when I am writing	Occasionally	Yes, to shorten or summarize a long piece of text that I wrote	Occasionally	Yes, to brainstorm research topics or questions to work on	Occasionally	Yes, to generate synthetic interviews and survey responses	Occasionally	Yes, to conduct analysis and reporting of qualitative data (e.g., of participant interviews)	Occasionally		Moderately useful	Very useful	Slightly useful	Very useful	Slightly useful	Moderately useful	Slightly Risky	Slightly Risky	Not at all Risky	Not at all Risky	Very Risky	Slightly Risky	Acceptable	Acceptable	Acceptable	Acceptable	Somewhat Unacceptable	Somewhat Acceptable		Somewhat comfortable	Comfortable	Comfortable	Somewhat uncomfortable	Neutral	Somewhat comfortable	Comfortable	Comfortable	Comfortable	Neutral	Neutral
2024-01-25 3:48:53	2024-01-25 4:00:16	100	683	TRUE	2024-01-25 4:00:16		Yes, to discover papers to read	Occasionally	No, I don't use LLMs for editing support when I am writing	Never	No, I don't use LLMs for directly writing text while I lead ideation	Never	No, I don't use LLMs for ideation and framing	Never	No, I don't use LLMs for data generation	Never	Yes, to clean and reformat datasets	Rarely		Very useful	Slightly useful	I have not use LLMs for this type of activity	I have not use LLMs for this type of activity	I have not use LLMs for this type of activity	Moderately useful	Not at all Risky	Extremely Risky	Extremely Risky	Slightly Risky	Very Risky	Slightly Risky	Acceptable	Somewhat Acceptable	Unacceptable	Neutral	Somewhat Acceptable	Acceptable	Comfortable	Somewhat uncomfortable	Uncomfortable	Uncomfortable	Uncomfortable	Somewhat uncomfortable	Comfortable	Uncomfortable	Uncomfortable	Uncomfortable	Uncomfortable	Uncomfortable
2024-02-02 12:36:38	2024-02-02 12:43:53	100	435	TRUE	2024-02-02 12:43:54		Yes, to generate summaries or explanations of papers or technical terms in papers,Yes, to ask broad questions of the field such as current trends or important findings	Occasionally	Yes, to rewrite text I've written to fix grammatical issues or awkward phrasings	Occasionally	Yes, to shorten or summarize a long piece of text that I wrote,Yes, to draft paragraphs from ideas or bullet points	Occasionally	Yes, to brainstorm research topics or questions to work on,Yes, to get inspiration for methods or approaches to use for a given problem	Occasionally	No, I don't use LLMs for data generation	Very Rarely	No, I don't use LLMs for data cleaning, analysis, or reporting	Very Rarely		Very useful	Extremely useful	Extremely useful	Extremely useful	Slightly useful	Slightly useful	Moderately Risky	Slightly Risky	Very Risky	Slightly Risky	Very Risky	Very Risky	Neutral	Somewhat Acceptable	Somewhat Unacceptable	Neutral	Somewhat Unacceptable	Neutral	Neutral	Neutral	Neutral	Neutral	Neutral	Neutral	Neutral	Neutral	Neutral	Neutral	Neutral	Neutral
2024-01-26 0:43:39	2024-01-26 2:20:49	100	5830	TRUE	2024-01-26 2:20:50		Yes, other:	Frequently	Yes, to rewrite text I've written to fix grammatical issues or awkward phrasings,Yes, to support paper formatting (e.g., LaTeX, formatting tables or formulas),Yes, other:	Very Frequently	Yes, to shorten or summarize a long piece of text that I wrote,Yes, to draft paragraphs from ideas or bullet points	Rarely	Yes, to get inspiration for methods or approaches to use for a given problem	Rarely	No, I don't use LLMs for data generation	Never	No, I don't use LLMs for data cleaning, analysis, or reporting	Never		Moderately useful	Extremely useful	Extremely useful	Moderately useful	Slightly useful	Slightly useful	Very Risky	Slightly Risky	Slightly Risky	Moderately Risky	Extremely Risky	Very Risky	Acceptable	Acceptable	Acceptable	Somewhat Acceptable	Somewhat Acceptable	Acceptable	Comfortable	Comfortable	Comfortable	Comfortable	Comfortable	Comfortable	Comfortable	Comfortable	Comfortable	Comfortable	Comfortable	Comfortable
2024-01-25 4:02:00	2024-01-25 4:04:55	43	174	FALSE	2024-02-01 4:05:01		No, I don't use LLMs for information seeking or reading	Never	Yes, to look up synonyms when I'm writing papers	Never	No, I don't use LLMs for directly writing text while I lead ideation	Never	No, I don't use LLMs for ideation and framing	Never	No, I don't use LLMs for data generation	Never	No, I don't use LLMs for data cleaning, analysis, or reporting	Never
2024-01-29 0:40:31	2024-01-29 0:45:46	100	315	TRUE	2024-01-29 0:45:47		No, I don't use LLMs for information seeking or reading	Never	No, I don't use LLMs for editing support when I am writing	Never	No, I don't use LLMs for directly writing text while I lead ideation	Never	No, I don't use LLMs for ideation and framing	Never	No, I don't use LLMs for data generation	Never	No, I don't use LLMs for data cleaning, analysis, or reporting	Never		I have not use LLMs for this type of activity	I have not use LLMs for this type of activity	I have not use LLMs for this type of activity	I have not use LLMs for this type of activity	I have not use LLMs for this type of activity	I have not use LLMs for this type of activity	Extremely Risky	Moderately Risky	Extremely Risky	Extremely Risky	Very Risky	Very Risky	Somewhat Unacceptable	Neutral	Unacceptable	Unacceptable	Neutral	Neutral	Unsure / Don't Know	Unsure / Don't Know	Unsure / Don't Know	Unsure / Don't Know	Unsure / Don't Know	Unsure / Don't Know	Unsure / Don't Know	Unsure / Don't Know	Unsure / Don't Know	Unsure / Don't Know	Unsure / Don't Know	Unsure / Don't Know
2023-11-28 15:36:12	2023-11-28 15:42:41	57	389	FALSE	2023-12-05 15:42:47		No, I don't use LLMs for information seeking or reading	Never	No, I don't use LLMs for editing support when I am writing	Never	No, I don't use LLMs for directly writing text while I lead ideation	Never	No, I don't use LLMs for ideation and framing	Never	No, I don't use LLMs for data generation	Never	No, I don't use LLMs for data cleaning, analysis, or reporting	Never		Not at all useful	Not at all useful	Not at all useful	Not at all useful	Not at all useful		Unsure / Don't Know	Unsure / Don't Know	Unsure / Don't Know	Unsure / Don't Know	Unsure / Don't Know	Unsure / Don't Know	Unsure / Don't Know	Unsure / Don't Know	Unsure / Don't Know	Unsure / Don't Know	Unsure / Don't Know	Unsure / Don't Know	Unsure / Don't Know	Unsure / Don't Know	Unsure / Don't Know	Unsure / Don't Know	Unsure / Don't Know	Unsure / Don't Know	Unsure / Don't Know	Unsure / Don't Know	Unsure / Don't Know	Unsure / Don't Know	Unsure / Don't Know	Unsure / Don't Know
2023-11-15 6:54:24	2023-11-15 7:19:43	100	1519	TRUE	2023-11-15 7:19:44		Yes, to discover papers to read,Yes, to discover important topics or threads of research for literature review,Yes, to generate summaries or explanations of papers or technical terms in papers,Yes, to ask broad questions of the field such as current trends or important findings,Yes, other:	Very Rarely	Yes, to rewrite text I've written to fix grammatical issues or awkward phrasings,Yes, to support paper formatting (e.g., LaTeX, formatting tables or formulas),Yes, other:	Very Rarely	Yes, to shorten or summarize a long piece of text that I wrote,No, I don't use LLMs for directly writing text while I lead ideation	Very Rarely	Yes, to brainstorm research topics or questions to work on,Yes, to get inspiration for methods or approaches to use for a given problem,Yes, other:	Rarely	No, I don't use LLMs for data generation	Never	Yes, to clean and reformat datasets,Yes, to conduct statistical reporting of quantitative data	Rarely		Extremely useful	Very useful	Slightly useful	Moderately useful	Not at all useful	Moderately useful	Moderately Risky	Moderately Risky	Very Risky	Very Risky	Extremely Risky	Moderately Risky	Acceptable	Acceptable	Neutral	Somewhat Acceptable	Neutral	Acceptable	Comfortable	Comfortable	Neutral	Somewhat comfortable	Neutral	Somewhat uncomfortable	Comfortable	Somewhat comfortable	Neutral	Somewhat comfortable	Somewhat uncomfortable	Neutral
2023-11-28 12:37:00	2023-11-28 12:57:50	100	1249	TRUE	2023-11-28 12:57:50		Yes, to discover important topics or threads of research for literature review	Very Rarely	Yes, to rewrite text I've written to fix grammatical issues or awkward phrasings	Frequently	Yes, to rewrite my writing into a different style (e.g., more formal)	Very Rarely	Yes, to come up with new ways to frame a paper, including titles and abstracts	Occasionally	Yes, to automatically produce training labels given example data	Occasionally	Yes, to simulate human ratings of an existing dataset for evaluation (e.g., summarization quality)	Occasionally		Very useful	Very useful	Very useful	Very useful	Moderately useful	Slightly useful	Moderately Risky	Moderately Risky	Not at all Risky	Not at all Risky	Slightly Risky	Slightly Risky	Neutral	Neutral	Neutral	Neutral	Neutral	Neutral	Comfortable	Comfortable	Comfortable	Comfortable	Neutral	Neutral	Comfortable	Comfortable	Comfortable	Comfortable	Comfortable	Comfortable
2023-11-28 11:10:28	2023-11-28 11:40:57	100	1829	TRUE	2023-11-28 11:40:58		Yes, to discover papers to read	Very Frequently	Yes, to rewrite text I've written to fix grammatical issues or awkward phrasings	Frequently	No, I don't use LLMs for directly writing text while I lead ideation	Never	No, I don't use LLMs for ideation and framing	Never	No, I don't use LLMs for data generation	Never	No, I don't use LLMs for data cleaning, analysis, or reporting	Never		Extremely useful	Extremely useful	Not at all useful	Not at all useful	Not at all useful	Moderately useful	Not at all Risky	Not at all Risky	Very Risky	Extremely Risky	Very Risky	Slightly Risky	Unacceptable	Neutral	Unacceptable	Unacceptable	Unacceptable	Neutral	Comfortable	Comfortable	Uncomfortable	Uncomfortable	Uncomfortable	Neutral	Comfortable	Comfortable	Uncomfortable	Uncomfortable	Neutral	Neutral
2023-11-28 9:34:40	2023-11-28 9:41:26	100	406	TRUE	2023-11-28 9:41:27		No, I don't use LLMs for information seeking or reading	Never	No, I don't use LLMs for editing support when I am writing	Never	No, I don't use LLMs for directly writing text while I lead ideation	Never	No, I don't use LLMs for ideation and framing	Never	No, I don't use LLMs for data generation	Never	No, I don't use LLMs for data cleaning, analysis, or reporting	Never		Not at all useful	Not at all useful	Not at all useful	Not at all useful	Not at all useful	Not at all useful	Very Risky	Very Risky	Very Risky	Very Risky	Very Risky	Very Risky	Unacceptable	Unacceptable	Unacceptable	Unacceptable	Unacceptable	Unacceptable	Uncomfortable	Uncomfortable	Uncomfortable	Uncomfortable	Uncomfortable	Uncomfortable	Uncomfortable	Uncomfortable	Uncomfortable	Uncomfortable	Uncomfortable	Uncomfortable
2024-01-25 4:52:43	2024-01-25 5:00:53	100	489	TRUE	2024-01-25 5:00:54		No, I don't use LLMs for information seeking or reading	Never	No, I don't use LLMs for editing support when I am writing	Never	No, I don't use LLMs for directly writing text while I lead ideation	Never	No, I don't use LLMs for ideation and framing	Never	No, I don't use LLMs for data generation	Never	No, I don't use LLMs for data cleaning, analysis, or reporting	Never		I have not use LLMs for this type of activity	I have not use LLMs for this type of activity	I have not use LLMs for this type of activity	I have not use LLMs for this type of activity	I have not use LLMs for this type of activity	I have not use LLMs for this type of activity	Unsure / Don't Know	Unsure / Don't Know	Unsure / Don't Know	Unsure / Don't Know	Unsure / Don't Know	Unsure / Don't Know	Somewhat Acceptable	Acceptable	Neutral	Neutral	Neutral	Somewhat Unacceptable	Comfortable	Comfortable	Comfortable	Comfortable	Comfortable	Comfortable	Comfortable	Comfortable	Comfortable	Comfortable	Comfortable	Comfortable
2023-11-28 6:57:50	2023-11-28 7:11:03	100	792	TRUE	2023-11-28 7:11:03		Yes, to discover papers to read,Yes, to discover important topics or threads of research for literature review	Frequently	No, I don't use LLMs for editing support when I am writing	Frequently	No, I don't use LLMs for directly writing text while I lead ideation	Never	No, I don't use LLMs for ideation and framing	Never	No, I don't use LLMs for data generation	Never	No, I don't use LLMs for data cleaning, analysis, or reporting	Never		Very useful	I have not use LLMs for this type of activity	I have not use LLMs for this type of activity	I have not use LLMs for this type of activity	I have not use LLMs for this type of activity	I have not use LLMs for this type of activity	Moderately Risky	Very Risky	Very Risky	Moderately Risky	Very Risky	Very Risky	Acceptable	Acceptable	Somewhat Unacceptable	Neutral	Somewhat Unacceptable	Somewhat Unacceptable	Comfortable	Comfortable	Comfortable	Comfortable	Comfortable	Comfortable	Comfortable	Comfortable	Comfortable	Comfortable	Comfortable	Comfortable
2023-11-28 3:31:01	2023-11-28 3:36:29	71	328	FALSE	2023-12-05 3:36:31		Yes, to discover papers to read,Yes, to discover important topics or threads of research for literature review,Yes, to generate summaries or explanations of papers or technical terms in papers,Yes, to ask broad questions of the field such as current trends or important findings	Occasionally	Yes, to look up synonyms when I'm writing papers,Yes, to rewrite text I've written to fix grammatical issues or awkward phrasings,Yes, to support paper formatting (e.g., LaTeX, formatting tables or formulas)	Occasionally	Yes, to shorten or summarize a long piece of text that I wrote,Yes, to draft paragraphs from ideas or bullet points,Yes, to rewrite my writing into a different style (e.g., more formal)	Occasionally	Yes, to brainstorm research topics or questions to work on,Yes, to come up with new ways to frame a paper, including titles and abstracts,Yes, to get inspiration for methods or approaches to use for a given problem	Occasionally	Yes, to generate synthetic interviews and survey responses,Yes, to automatically produce training labels given example data,Yes, to automatically produce both training examples and labels	Occasionally	Yes, to clean and reformat datasets,Yes, to conduct statistical reporting of quantitative data,Yes, to conduct analysis and reporting of qualitative data (e.g., of participant interviews),Yes, to simulate human ratings of an existing dataset for evaluation (e.g., summarization quality)	Occasionally		Extremely useful	Very useful	Extremely useful	Very useful	Extremely useful	Very useful	Slightly Risky	Slightly Risky	Slightly Risky	Slightly Risky	Slightly Risky	Slightly Risky	Acceptable	Somewhat Acceptable	Acceptable	Somewhat Acceptable	Acceptable	Somewhat Acceptable	Comfortable	Comfortable	Comfortable	Comfortable	Comfortable	Comfortable	Comfortable	Comfortable	Comfortable	Comfortable	Comfortable	Comfortable
2024-01-25 5:39:13	2024-01-25 5:50:21	100	668	TRUE	2024-01-25 5:50:22		Yes, to discover papers to read,Yes, to discover important topics or threads of research for literature review	Occasionally	Yes, other:	Very Rarely	No, I don't use LLMs for directly writing text while I lead ideation	Never	Yes, to brainstorm research topics or questions to work on	Occasionally	No, I don't use LLMs for data generation	Never	No, I don't use LLMs for data cleaning, analysis, or reporting	Never		Moderately useful	Moderately useful	Not at all useful	Extremely useful	Slightly useful	Slightly useful	Extremely Risky	Extremely Risky	Extremely Risky	Very Risky	Extremely Risky	Extremely Risky	Acceptable	Somewhat Acceptable	Neutral	Acceptable	Neutral	Neutral	Comfortable	Neutral	Somewhat uncomfortable	Comfortable	Neutral	Neutral	Comfortable	Neutral	Somewhat uncomfortable	Comfortable	Neutral	Neutral
2024-01-25 13:28:01	2024-01-25 13:47:05	100	1144	TRUE	2024-01-25 13:47:06		No, I don't use LLMs for information seeking or reading	Very Rarely	Yes, to rewrite text I've written to fix grammatical issues or awkward phrasings	Frequently	Yes, to rewrite my writing into a different style (e.g., more formal)	Frequently	Yes, to brainstorm research topics or questions to work on,Yes, to come up with new ways to frame a paper, including titles and abstracts,Yes, to get inspiration for methods or approaches to use for a given problem	Very Rarely	Yes, to automatically produce training labels given example data,Yes, to automatically produce both training examples and labels	Occasionally	Yes, to simulate human ratings of an existing dataset for evaluation (e.g., summarization quality)	Very Rarely		Moderately useful	Extremely useful	Extremely useful	Very useful	Extremely useful	Moderately useful	Very Risky	Not at all Risky	Not at all Risky	Slightly Risky	Moderately Risky	Moderately Risky	Acceptable	Acceptable	Acceptable	Acceptable	Acceptable	Acceptable	Comfortable	Comfortable	Comfortable	Comfortable	Comfortable	Comfortable	Comfortable	Comfortable	Comfortable	Neutral	Comfortable	Comfortable
2023-11-22 15:57:00	2023-11-22 16:02:44	100	344	TRUE	2023-11-22 16:02:45		Yes, to generate summaries or explanations of papers or technical terms in papers	Very Rarely	Yes, to look up synonyms when I'm writing papers,Yes, to rewrite text I've written to fix grammatical issues or awkward phrasings,Yes, to support paper formatting (e.g., LaTeX, formatting tables or formulas)	Occasionally	Yes, to shorten or summarize a long piece of text that I wrote,Yes, to draft paragraphs from ideas or bullet points	Very Rarely	No, I don't use LLMs for ideation and framing	Very Rarely	Yes, other:	Occasionally	Yes, to clean and reformat datasets,Yes, to conduct statistical reporting of quantitative data	Rarely		Slightly useful	Extremely useful	Moderately useful	Slightly useful	Very useful	Very useful	Extremely Risky	Moderately Risky	Very Risky	Very Risky	Moderately Risky	Moderately Risky	Somewhat Acceptable	Acceptable	Somewhat Unacceptable	Neutral	Somewhat Acceptable	Somewhat Acceptable	Somewhat uncomfortable	Comfortable	Somewhat uncomfortable	Somewhat uncomfortable	Somewhat comfortable	Somewhat comfortable	Somewhat uncomfortable	Neutral	Somewhat uncomfortable	Somewhat uncomfortable	Neutral	Neutral
2024-01-25 10:55:08	2024-01-25 10:58:47	43	219	FALSE	2024-02-01 10:58:48		Yes, to discover papers to read,Yes, to discover important topics or threads of research for literature review,Yes, to generate summaries or explanations of papers or technical terms in papers,Yes, to ask broad questions of the field such as current trends or important findings,Yes, other:	Very Frequently	Yes, to look up synonyms when I'm writing papers,Yes, to rewrite text I've written to fix grammatical issues or awkward phrasings	Frequently	Yes, to shorten or summarize a long piece of text that I wrote,Yes, to draft paragraphs from ideas or bullet points,Yes, to rewrite my writing into a different style (e.g., more formal)	Very Frequently	Yes, to brainstorm research topics or questions to work on,Yes, to come up with new ways to frame a paper, including titles and abstracts	Occasionally	Yes, to automatically produce both training examples and labels	Frequently	Yes, to clean and reformat datasets	Occasionally
2023-11-16 16:50:10	2023-11-16 18:46:37	43	6986	FALSE	2023-11-23 18:46:40		Yes, to generate summaries or explanations of papers or technical terms in papers	Occasionally	Yes, to support paper formatting (e.g., LaTeX, formatting tables or formulas),No, I don't use LLMs for editing support when I am writing	Rarely	Yes, to shorten or summarize a long piece of text that I wrote,Yes, to draft paragraphs from ideas or bullet points	Very Rarely	No, I don't use LLMs for ideation and framing	Very Rarely	Yes, to automatically produce training labels given example data	Occasionally	Yes, to conduct analysis and reporting of qualitative data (e.g., of participant interviews)	Occasionally
2023-11-28 12:50:55	2023-11-28 12:58:38	100	463	TRUE	2023-11-28 12:58:38		No, I don't use LLMs for information seeking or reading	Very Rarely	No, I don't use LLMs for editing support when I am writing	Never	No, I don't use LLMs for directly writing text while I lead ideation	Never	Yes, to get inspiration for methods or approaches to use for a given problem	Very Rarely	No, I don't use LLMs for data generation	Never	No, I don't use LLMs for data cleaning, analysis, or reporting	Never		Slightly useful	Moderately useful	I have not use LLMs for this type of activity	Moderately useful	I have not use LLMs for this type of activity	I have not use LLMs for this type of activity	Moderately Risky	Slightly Risky	Extremely Risky	Very Risky	Extremely Risky	Extremely Risky	Neutral	Somewhat Acceptable	Unacceptable	Somewhat Unacceptable	Unacceptable	Unacceptable	Somewhat comfortable	Neutral	Uncomfortable	Somewhat uncomfortable	Uncomfortable	Uncomfortable	Somewhat comfortable	Neutral	Uncomfortable	Somewhat uncomfortable	Uncomfortable	Uncomfortable
2023-11-28 11:06:28	2023-11-28 11:10:22	43	233	FALSE	2023-12-05 11:19:46		Yes, to discover papers to read,Yes, to discover important topics or threads of research for literature review,Yes, to generate summaries or explanations of papers or technical terms in papers,Yes, to ask broad questions of the field such as current trends or important findings	Frequently	Yes, to look up synonyms when I'm writing papers,Yes, to rewrite text I've written to fix grammatical issues or awkward phrasings	Occasionally	Yes, to shorten or summarize a long piece of text that I wrote,Yes, to draft paragraphs from ideas or bullet points	Occasionally	Yes, to brainstorm research topics or questions to work on,Yes, to come up with new ways to frame a paper, including titles and abstracts,Yes, to get inspiration for methods or approaches to use for a given problem	Never	No, I don't use LLMs for data generation	Never	No, I don't use LLMs for data cleaning, analysis, or reporting	Never
2024-01-25 17:30:05	2024-01-25 17:34:07	43	242	FALSE	2024-02-01 17:34:10		No, I don't use LLMs for information seeking or reading	Very Rarely	No, I don't use LLMs for editing support when I am writing	Very Rarely	Yes, to draft paragraphs from ideas or bullet points	Occasionally	Yes, to brainstorm research topics or questions to work on,Yes, to come up with new ways to frame a paper, including titles and abstracts	Occasionally	Yes, to automatically produce both training examples and labels	Occasionally	No, I don't use LLMs for data cleaning, analysis, or reporting	Never
2023-11-28 21:14:20	2023-11-28 21:51:50	100	2249	TRUE	2023-11-28 21:51:51		No, I don't use LLMs for information seeking or reading	Never	No, I don't use LLMs for editing support when I am writing	Never	No, I don't use LLMs for directly writing text while I lead ideation	Never	No, I don't use LLMs for ideation and framing	Never	No, I don't use LLMs for data generation	Never	No, I don't use LLMs for data cleaning, analysis, or reporting	Occasionally		I have not use LLMs for this type of activity	I have not use LLMs for this type of activity	I have not use LLMs for this type of activity	I have not use LLMs for this type of activity	I have not use LLMs for this type of activity	I have not use LLMs for this type of activity	Unsure / Don't Know	Unsure / Don't Know	Unsure / Don't Know	Unsure / Don't Know	Unsure / Don't Know	Unsure / Don't Know	Unsure / Don't Know	Unsure / Don't Know	Unsure / Don't Know	Unsure / Don't Know	Unsure / Don't Know	Unsure / Don't Know	Unsure / Don't Know	Unsure / Don't Know	Unsure / Don't Know	Unsure / Don't Know	Unsure / Don't Know	Unsure / Don't Know	Unsure / Don't Know	Unsure / Don't Know	Unsure / Don't Know	Unsure / Don't Know	Unsure / Don't Know	Unsure / Don't Know
2024-01-25 13:00:54	2024-01-25 13:05:38	43	284	FALSE	2024-02-01 13:05:42		No, I don't use LLMs for information seeking or reading	Never	Yes, to support paper formatting (e.g., LaTeX, formatting tables or formulas)	Rarely	No, I don't use LLMs for directly writing text while I lead ideation	Never	No, I don't use LLMs for ideation and framing	Never	No, I don't use LLMs for data generation	Never	No, I don't use LLMs for data cleaning, analysis, or reporting	Never
2023-11-27 20:53:16	2023-11-27 21:07:01	100	824	TRUE	2023-11-27 21:07:02		Yes, to discover papers to read,Yes, to discover important topics or threads of research for literature review	Occasionally	No, I don't use LLMs for editing support when I am writing	Never	No, I don't use LLMs for directly writing text while I lead ideation	Never	No, I don't use LLMs for ideation and framing	Never	No, I don't use LLMs for data generation	Never	No, I don't use LLMs for data cleaning, analysis, or reporting	Never		Moderately useful	I have not use LLMs for this type of activity	I have not use LLMs for this type of activity	I have not use LLMs for this type of activity	I have not use LLMs for this type of activity	I have not use LLMs for this type of activity	Slightly Risky	Moderately Risky	Very Risky	Slightly Risky	Extremely Risky	Extremely Risky	Acceptable	Acceptable	Neutral	Acceptable	Unacceptable	Somewhat Acceptable	Comfortable	Somewhat comfortable	Neutral	Somewhat uncomfortable	Uncomfortable	Uncomfortable	Comfortable	Somewhat uncomfortable	Uncomfortable	Uncomfortable	Uncomfortable	Uncomfortable
2023-11-28 7:02:35	2023-11-28 7:08:29	100	353	TRUE	2023-11-28 7:08:30		Yes, to discover papers to read,Yes, to discover important topics or threads of research for literature review,Yes, other:	Rarely	Yes, to rewrite text I've written to fix grammatical issues or awkward phrasings,Yes, other:	Very Rarely	Yes, to draft paragraphs from ideas or bullet points,Yes, other:	Very Rarely	Yes, to get inspiration for methods or approaches to use for a given problem,No, I don't use LLMs for ideation and framing	Occasionally	Yes, to automatically produce both training examples and labels	Rarely	Yes, other:	Rarely		Moderately useful	Very useful	Moderately useful	Very useful	Very useful	Moderately useful	Moderately Risky	Moderately Risky	Extremely Risky	Unsure / Don't Know	Extremely Risky	Unsure / Don't Know	Somewhat Acceptable	Somewhat Unacceptable	Neutral	Somewhat Unacceptable	Neutral	Acceptable		Comfortable	Uncomfortable	Uncomfortable	Neutral	Comfortable	Comfortable	Comfortable	Comfortable	Comfortable	Somewhat uncomfortable
2023-11-28 7:13:30	2023-11-28 7:31:41	100	1091	TRUE	2023-11-28 7:31:42		Yes, to discover important topics or threads of research for literature review	Very Frequently	Yes, to look up synonyms when I'm writing papers	Frequently	Yes, to shorten or summarize a long piece of text that I wrote	Frequently	Yes, to come up with new ways to frame a paper, including titles and abstracts	Frequently	Yes, to automatically produce training labels given example data	Frequently	Yes, to conduct statistical reporting of quantitative data	Frequently		Very useful	Extremely useful	Very useful	Very useful	Very useful	Very useful	Not at all Risky	Not at all Risky	Not at all Risky	Not at all Risky	Not at all Risky	Not at all Risky	Acceptable	Acceptable	Acceptable	Acceptable	Acceptable	Acceptable	Comfortable	Comfortable	Comfortable	Comfortable	Comfortable	Comfortable	Comfortable	Comfortable	Comfortable	Comfortable	Comfortable	Comfortable
2024-01-25 3:51:28	2024-01-25 4:02:09	100	641	TRUE	2024-01-25 4:02:10		No, I don't use LLMs for information seeking or reading	Very Rarely	Yes, to look up synonyms when I'm writing papers,Yes, to rewrite text I've written to fix grammatical issues or awkward phrasings	Occasionally	Yes, to shorten or summarize a long piece of text that I wrote,Yes, to draft paragraphs from ideas or bullet points,Yes, to rewrite my writing into a different style (e.g., more formal)	Occasionally	Yes, to come up with new ways to frame a paper, including titles and abstracts	Occasionally	No, I don't use LLMs for data generation	Never	Yes, to conduct analysis and reporting of qualitative data (e.g., of participant interviews)	Rarely		Not at all useful	Extremely useful	Very useful	Very useful	Slightly useful	Moderately useful	Extremely Risky	Moderately Risky	Moderately Risky	Moderately Risky	Extremely Risky	Extremely Risky	Unacceptable	Acceptable	Acceptable	Acceptable	Somewhat Unacceptable	Somewhat Unacceptable	Comfortable	Comfortable	Comfortable	Comfortable	Comfortable	Comfortable	Comfortable	Comfortable	Comfortable	Comfortable	Comfortable	Comfortable
2024-01-25 14:26:48	2024-01-25 14:42:17	100	929	TRUE	2024-01-25 14:42:18		Yes, to discover papers to read	Rarely	Yes, to rewrite text I've written to fix grammatical issues or awkward phrasings	Frequently	No, I don't use LLMs for directly writing text while I lead ideation	Never	No, I don't use LLMs for ideation and framing	Never	No, I don't use LLMs for data generation	Never	Yes, to clean and reformat datasets	Very Rarely		Very useful	Very useful	Slightly useful	Slightly useful	Slightly useful	Very useful	Very Risky	Moderately Risky	Extremely Risky	Moderately Risky	Not at all Risky	Not at all Risky	Acceptable	Acceptable	Somewhat Unacceptable	Somewhat Acceptable	Acceptable	Acceptable	Comfortable	Comfortable	Comfortable	Comfortable	Comfortable	Comfortable	Comfortable	Comfortable	Comfortable	Comfortable	Comfortable	Comfortable
2023-11-29 8:12:02	2023-11-29 8:19:48	100	465	TRUE	2023-11-29 8:19:49		Yes, to discover important topics or threads of research for literature review,Yes, to generate summaries or explanations of papers or technical terms in papers	Frequently	No, I don't use LLMs for editing support when I am writing	Very Rarely	No, I don't use LLMs for directly writing text while I lead ideation	Never	No, I don't use LLMs for ideation and framing	Never	No, I don't use LLMs for data generation	Never	No, I don't use LLMs for data cleaning, analysis, or reporting	Never		Extremely useful	I have not use LLMs for this type of activity	I have not use LLMs for this type of activity	I have not use LLMs for this type of activity	I have not use LLMs for this type of activity	I have not use LLMs for this type of activity	Not at all Risky	Unsure / Don't Know	Unsure / Don't Know	Unsure / Don't Know	Unsure / Don't Know	Unsure / Don't Know	Neutral	Neutral	Neutral	Neutral	Neutral	Neutral	Comfortable	Unsure / Don't Know	Unsure / Don't Know	Unsure / Don't Know	Unsure / Don't Know	Unsure / Don't Know	Comfortable	Unsure / Don't Know	Unsure / Don't Know	Unsure / Don't Know	Unsure / Don't Know	Unsure / Don't Know
2023-11-28 3:40:46	2023-11-28 3:51:38	100	651	TRUE	2023-11-28 3:51:39		Yes, to ask broad questions of the field such as current trends or important findings	Occasionally	Yes, to rewrite text I've written to fix grammatical issues or awkward phrasings	Frequently	Yes, to shorten or summarize a long piece of text that I wrote,Yes, to draft paragraphs from ideas or bullet points	Occasionally	Yes, to brainstorm research topics or questions to work on,Yes, to get inspiration for methods or approaches to use for a given problem	Very Rarely	No, I don't use LLMs for data generation	Never	No, I don't use LLMs for data cleaning, analysis, or reporting	Never		Moderately useful	Very useful	Very useful	Slightly useful	I have not use LLMs for this type of activity	I have not use LLMs for this type of activity	Moderately Risky	Slightly Risky	Moderately Risky	Slightly Risky	Very Risky	Moderately Risky	Acceptable	Acceptable	Acceptable		Neutral	Acceptable	Somewhat comfortable	Somewhat comfortable	Somewhat comfortable	Somewhat comfortable	Somewhat uncomfortable	Somewhat comfortable	Somewhat comfortable	Unsure / Don't Know	Somewhat uncomfortable	Somewhat uncomfortable	Uncomfortable	Unsure / Don't Know
2023-11-16 10:25:32	2023-11-22 5:37:23	100	501110	TRUE	2023-11-22 5:37:23		Yes, to discover papers to read,Yes, to discover important topics or threads of research for literature review,Yes, to generate summaries or explanations of papers or technical terms in papers,Yes, to ask broad questions of the field such as current trends or important findings,Yes, other:	Very Frequently	Yes, to rewrite text I've written to fix grammatical issues or awkward phrasings	Occasionally	Yes, to shorten or summarize a long piece of text that I wrote,Yes, to draft paragraphs from ideas or bullet points	Occasionally	Yes, to brainstorm research topics or questions to work on,Yes, to get inspiration for methods or approaches to use for a given problem	Occasionally	No, I don't use LLMs for data generation	Never	Yes, to clean and reformat datasets,Yes, to conduct statistical reporting of quantitative data,Yes, to conduct analysis and reporting of qualitative data (e.g., of participant interviews)	Frequently		Very useful	Slightly useful	Slightly useful	Moderately useful	I have not use LLMs for this type of activity	Extremely useful	Slightly Risky	Not at all Risky	Slightly Risky	Not at all Risky	Very Risky	Moderately Risky	Acceptable	Acceptable	Somewhat Acceptable	Somewhat Acceptable	Somewhat Acceptable	Acceptable	Comfortable	Comfortable	Comfortable	Comfortable	Unsure / Don't Know	Somewhat comfortable	Unsure / Don't Know	Unsure / Don't Know	Unsure / Don't Know	Unsure / Don't Know	Comfortable	Somewhat comfortable
2023-11-26 20:39:55	2023-11-26 20:49:41	43	586	FALSE	2023-12-03 20:49:47		Yes, to discover papers to read,Yes, to discover important topics or threads of research for literature review,Yes, to generate summaries or explanations of papers or technical terms in papers,Yes, to ask broad questions of the field such as current trends or important findings,No, I don't use LLMs for information seeking or reading	Never	Yes, to look up synonyms when I'm writing papers,Yes, to rewrite text I've written to fix grammatical issues or awkward phrasings,Yes, to support paper formatting (e.g., LaTeX, formatting tables or formulas),No, I don't use LLMs for editing support when I am writing	Never	Yes, to shorten or summarize a long piece of text that I wrote,Yes, to draft paragraphs from ideas or bullet points,No, I don't use LLMs for directly writing text while I lead ideation	Never	Yes, to brainstorm research topics or questions to work on,Yes, to come up with new ways to frame a paper, including titles and abstracts,Yes, to get inspiration for methods or approaches to use for a given problem,No, I don't use LLMs for ideation and framing	Never	No, I don't use LLMs for data generation	Never	No, I don't use LLMs for data cleaning, analysis, or reporting	Never
2024-01-25 20:58:14	2024-01-26 3:41:27	100	24192	TRUE	2024-01-26 3:41:28		Yes, to discover papers to read,Yes, to discover important topics or threads of research for literature review,Yes, to generate summaries or explanations of papers or technical terms in papers,Yes, to ask broad questions of the field such as current trends or important findings,Yes, other:	Frequently	Yes, to look up synonyms when I'm writing papers,Yes, to rewrite text I've written to fix grammatical issues or awkward phrasings,Yes, to support paper formatting (e.g., LaTeX, formatting tables or formulas),Yes, other:	Occasionally	Yes, to shorten or summarize a long piece of text that I wrote,Yes, to draft paragraphs from ideas or bullet points,Yes, to rewrite my writing into a different style (e.g., more formal),Yes, other:	Frequently	Yes, to brainstorm research topics or questions to work on,Yes, to come up with new ways to frame a paper, including titles and abstracts,Yes, to get inspiration for methods or approaches to use for a given problem,Yes, other:	Frequently	Yes, to automatically produce training labels given example data,Yes, to automatically produce both training examples and labels,Yes, other:	Frequently	Yes, to conduct statistical reporting of quantitative data	Frequently		Extremely useful	Very useful	Slightly useful	Very useful	Very useful	Extremely useful	Extremely Risky	Very Risky	Extremely Risky	Moderately Risky	Very Risky	Moderately Risky	Unacceptable	Acceptable	Unacceptable	Somewhat Acceptable	Somewhat Acceptable	Acceptable	Comfortable	Somewhat comfortable	Uncomfortable	Somewhat comfortable	Somewhat comfortable	Somewhat comfortable	Comfortable	Somewhat comfortable	Uncomfortable	Somewhat comfortable	Somewhat comfortable	Somewhat comfortable
2024-01-25 23:16:40	2024-01-25 23:24:34	100	474	TRUE	2024-01-25 23:24:35		Yes, to ask broad questions of the field such as current trends or important findings	Very Rarely	Yes, to look up synonyms when I'm writing papers	Never	No, I don't use LLMs for directly writing text while I lead ideation	Never	Yes, to come up with new ways to frame a paper, including titles and abstracts	Occasionally	No, I don't use LLMs for data generation	Never	Yes, to clean and reformat datasets	Frequently		Slightly useful	Slightly useful	Not at all useful	Very useful	Very useful	Extremely useful	Extremely Risky	Slightly Risky	Extremely Risky	Slightly Risky	Moderately Risky	Moderately Risky	Acceptable	Somewhat Acceptable	Somewhat Unacceptable	Somewhat Acceptable	Acceptable	Acceptable	Comfortable	Comfortable	Comfortable	Comfortable	Comfortable	Comfortable	Comfortable	Comfortable	Comfortable	Comfortable	Comfortable	Comfortable
2024-01-25 13:38:20	2024-01-25 13:43:38	100	317	TRUE	2024-01-25 13:43:38		No, I don't use LLMs for information seeking or reading	Never	No, I don't use LLMs for editing support when I am writing	Never	No, I don't use LLMs for directly writing text while I lead ideation	Never	No, I don't use LLMs for ideation and framing	Never	No, I don't use LLMs for data generation	Never	No, I don't use LLMs for data cleaning, analysis, or reporting	Never		Not at all useful	Not at all useful	Not at all useful	Not at all useful	Not at all useful	Not at all useful	Extremely Risky	Extremely Risky	Extremely Risky	Extremely Risky	Extremely Risky	Extremely Risky	Acceptable	Acceptable	Acceptable	Acceptable	Acceptable	Acceptable	Comfortable	Comfortable	Comfortable	Comfortable	Comfortable	Comfortable	Comfortable	Comfortable	Comfortable	Comfortable	Comfortable	Comfortable
2024-01-26 3:36:17	2024-01-26 3:44:30	100	493	TRUE	2024-01-26 3:44:31		Yes, to discover papers to read,Yes, to ask broad questions of the field such as current trends or important findings	Occasionally	Yes, to look up synonyms when I'm writing papers,Yes, to rewrite text I've written to fix grammatical issues or awkward phrasings,Yes, to support paper formatting (e.g., LaTeX, formatting tables or formulas)	Frequently	Yes, to draft paragraphs from ideas or bullet points,Yes, to rewrite my writing into a different style (e.g., more formal)	Frequently	Yes, to come up with new ways to frame a paper, including titles and abstracts	Very Rarely	No, I don't use LLMs for data generation	Never	No, I don't use LLMs for data cleaning, analysis, or reporting	Never		Moderately useful	Extremely useful	Very useful	Moderately useful	I have not use LLMs for this type of activity	I have not use LLMs for this type of activity	Moderately Risky	Slightly Risky	Slightly Risky	Not at all Risky	Very Risky	Extremely Risky	Acceptable	Acceptable	Acceptable	Acceptable	Acceptable	Acceptable	Comfortable	Neutral	Somewhat uncomfortable	Somewhat uncomfortable	Somewhat uncomfortable	Uncomfortable	Comfortable	Neutral	Somewhat uncomfortable	Neutral	Comfortable	Uncomfortable
2024-01-25 16:38:26	2024-01-25 16:48:59	100	632	TRUE	2024-01-25 16:49:00		No, I don't use LLMs for information seeking or reading	Never	No, I don't use LLMs for editing support when I am writing	Never	No, I don't use LLMs for directly writing text while I lead ideation	Never	No, I don't use LLMs for ideation and framing	Never	No, I don't use LLMs for data generation	Never	No, I don't use LLMs for data cleaning, analysis, or reporting	Never		I have not use LLMs for this type of activity	I have not use LLMs for this type of activity	I have not use LLMs for this type of activity	I have not use LLMs for this type of activity	I have not use LLMs for this type of activity	I have not use LLMs for this type of activity	Unsure / Don't Know	Unsure / Don't Know	Unsure / Don't Know	Unsure / Don't Know	Unsure / Don't Know	Unsure / Don't Know	Unsure / Don't Know	Unsure / Don't Know	Unsure / Don't Know	Unsure / Don't Know	Unsure / Don't Know	Unsure / Don't Know	Unsure / Don't Know	Unsure / Don't Know	Unsure / Don't Know	Unsure / Don't Know	Unsure / Don't Know	Unsure / Don't Know	Unsure / Don't Know	Unsure / Don't Know	Unsure / Don't Know	Unsure / Don't Know	Unsure / Don't Know	Unsure / Don't Know
2024-01-25 22:57:20	2024-01-25 23:08:47	100	686	TRUE	2024-01-25 23:08:48		Yes, to discover important topics or threads of research for literature review,Yes, to generate summaries or explanations of papers or technical terms in papers	Occasionally	Yes, to look up synonyms when I'm writing papers,Yes, to rewrite text I've written to fix grammatical issues or awkward phrasings	Frequently	Yes, to shorten or summarize a long piece of text that I wrote	Rarely	No, I don't use LLMs for ideation and framing	Never	No, I don't use LLMs for data generation	Never	No, I don't use LLMs for data cleaning, analysis, or reporting	Never		Moderately useful	Very useful	Moderately useful	I have not use LLMs for this type of activity	I have not use LLMs for this type of activity	I have not use LLMs for this type of activity	Moderately Risky	Slightly Risky	Moderately Risky	Moderately Risky	Very Risky	Very Risky	Neutral	Acceptable	Neutral	Somewhat Acceptable	Unsure / Don't Know	Somewhat Unacceptable	Comfortable	Comfortable	Neutral	Somewhat uncomfortable	Uncomfortable	Uncomfortable	Somewhat uncomfortable	Somewhat uncomfortable	Uncomfortable	Uncomfortable	Uncomfortable	Uncomfortable
2024-01-25 12:57:04	2024-01-25 13:13:59	100	1015	TRUE	2024-01-25 13:14:00		Yes, to generate summaries or explanations of papers or technical terms in papers,Yes, to ask broad questions of the field such as current trends or important findings,Yes, other:	Frequently	Yes, to rewrite text I've written to fix grammatical issues or awkward phrasings	Very Rarely	No, I don't use LLMs for directly writing text while I lead ideation	Never	No, I don't use LLMs for ideation and framing	Never	Yes, to automatically produce both training examples and labels	Rarely	Yes, other:	Very Rarely		Extremely useful	Moderately useful	Slightly useful	Moderately useful	Moderately useful	Slightly useful	Moderately Risky	Slightly Risky	Very Risky	Moderately Risky	Extremely Risky	Very Risky	Acceptable	Somewhat Acceptable	Somewhat Acceptable	Acceptable	Somewhat Acceptable	Somewhat Acceptable	Comfortable	Comfortable	Comfortable	Comfortable	Comfortable	Comfortable	Comfortable	Comfortable	Comfortable	Comfortable	Comfortable	Comfortable
2023-11-28 13:30:55	2023-11-28 13:39:46	57	531	FALSE	2023-12-05 13:39:48		Yes, to discover papers to read,Yes, to discover important topics or threads of research for literature review,Yes, to generate summaries or explanations of papers or technical terms in papers,Yes, to ask broad questions of the field such as current trends or important findings	Frequently	Yes, to rewrite text I've written to fix grammatical issues or awkward phrasings,Yes, to support paper formatting (e.g., LaTeX, formatting tables or formulas)	Frequently	Yes, to shorten or summarize a long piece of text that I wrote,Yes, to draft paragraphs from ideas or bullet points,Yes, to rewrite my writing into a different style (e.g., more formal)	Occasionally	Yes, to brainstorm research topics or questions to work on,Yes, to come up with new ways to frame a paper, including titles and abstracts	Occasionally	Yes, to generate synthetic interviews and survey responses,Yes, to automatically produce training labels given example data,Yes, to automatically produce both training examples and labels	Frequently	Yes, to clean and reformat datasets,Yes, to conduct statistical reporting of quantitative data,Yes, to conduct analysis and reporting of qualitative data (e.g., of participant interviews)	Frequently		Moderately useful	Moderately useful	Very useful	Moderately useful	Moderately useful	Very useful	Moderately Risky	Moderately Risky	Very Risky	Very Risky	Moderately Risky	Very Risky	Somewhat Acceptable	Neutral	Somewhat Acceptable	Neutral	Somewhat Unacceptable	Somewhat Acceptable	Somewhat uncomfortable	Comfortable	Neutral	Somewhat uncomfortable	Somewhat comfortable	Somewhat comfortable	Neutral		Somewhat comfortable	Comfortable	Unsure / Don't Know	Comfortable
2024-01-25 14:26:59	2024-01-25 14:34:35	100	455	TRUE	2024-01-25 14:34:36		Yes, to discover papers to read,Yes, to discover important topics or threads of research for literature review,Yes, to generate summaries or explanations of papers or technical terms in papers,Yes, to ask broad questions of the field such as current trends or important findings	Frequently	Yes, to look up synonyms when I'm writing papers,Yes, to rewrite text I've written to fix grammatical issues or awkward phrasings,Yes, to support paper formatting (e.g., LaTeX, formatting tables or formulas)	Occasionally	Yes, to shorten or summarize a long piece of text that I wrote,Yes, to draft paragraphs from ideas or bullet points,Yes, to rewrite my writing into a different style (e.g., more formal)	Occasionally	Yes, to brainstorm research topics or questions to work on,Yes, to come up with new ways to frame a paper, including titles and abstracts,Yes, to get inspiration for methods or approaches to use for a given problem	Occasionally	Yes, to generate synthetic interviews and survey responses,Yes, to automatically produce training labels given example data,Yes, to automatically produce both training examples and labels	Occasionally	Yes, to clean and reformat datasets,Yes, to conduct statistical reporting of quantitative data,Yes, to conduct analysis and reporting of qualitative data (e.g., of participant interviews)	Frequently		Very useful	Very useful	Very useful	Very useful	Very useful	Very useful	Very Risky	Very Risky	Moderately Risky	Moderately Risky	Moderately Risky	Moderately Risky	Somewhat Acceptable	Somewhat Acceptable	Acceptable	Acceptable	Somewhat Acceptable	Somewhat Acceptable	Neutral	Somewhat comfortable	Comfortable	Comfortable	Somewhat comfortable	Somewhat comfortable	Somewhat comfortable	Neutral	Somewhat comfortable	Comfortable	Somewhat comfortable	Somewhat comfortable
2024-01-25 6:41:03	2024-01-25 7:10:38	100	1775	TRUE	2024-01-25 7:10:39		Yes, to generate summaries or explanations of papers or technical terms in papers,Yes, other:	Rarely	Yes, other:	Never	Yes, other:	Occasionally	No, I don't use LLMs for ideation and framing	Never	No, I don't use LLMs for data generation	Never	No, I don't use LLMs for data cleaning, analysis, or reporting	Never		I have not use LLMs for this type of activity	Moderately useful	I have not use LLMs for this type of activity	I have not use LLMs for this type of activity	I have not use LLMs for this type of activity	I have not use LLMs for this type of activity	Slightly Risky	Moderately Risky	Unsure / Don't Know	Unsure / Don't Know	Unsure / Don't Know	Unsure / Don't Know	Acceptable	Acceptable	Acceptable	Acceptable	Acceptable	Acceptable	Comfortable	Comfortable	Comfortable	Comfortable	Comfortable	Comfortable	Comfortable	Comfortable	Comfortable	Comfortable	Comfortable	Comfortable
2023-11-28 4:41:50	2023-11-28 4:46:10	57	260	FALSE	2023-12-05 4:46:11		No, I don't use LLMs for information seeking or reading	Never	No, I don't use LLMs for editing support when I am writing	Never	No, I don't use LLMs for directly writing text while I lead ideation	Never	No, I don't use LLMs for ideation and framing	Never	No, I don't use LLMs for data generation	Never	No, I don't use LLMs for data cleaning, analysis, or reporting	Never		Not at all useful	Not at all useful	Not at all useful	Not at all useful	Not at all useful	Not at all useful	Unsure / Don't Know	Unsure / Don't Know	Unsure / Don't Know	Unsure / Don't Know	Unsure / Don't Know	Unsure / Don't Know	Unsure / Don't Know	Unsure / Don't Know	Unsure / Don't Know	Unsure / Don't Know	Unsure / Don't Know	Unsure / Don't Know	Uncomfortable	Uncomfortable	Uncomfortable	Uncomfortable	Uncomfortable	Uncomfortable	Unsure / Don't Know	Unsure / Don't Know	Unsure / Don't Know	Unsure / Don't Know	Unsure / Don't Know	Unsure / Don't Know
2023-11-15 2:47:21	2023-11-15 3:07:56	100	1234	TRUE	2023-11-15 3:07:57		No, I don't use LLMs for information seeking or reading	Never	No, I don't use LLMs for editing support when I am writing	Never	No, I don't use LLMs for directly writing text while I lead ideation	Never	No, I don't use LLMs for ideation and framing	Never	No, I don't use LLMs for data generation	Never	No, I don't use LLMs for data cleaning, analysis, or reporting	Never		I have not use LLMs for this type of activity	I have not use LLMs for this type of activity	I have not use LLMs for this type of activity	I have not use LLMs for this type of activity	I have not use LLMs for this type of activity	I have not use LLMs for this type of activity	Unsure / Don't Know	Unsure / Don't Know	Unsure / Don't Know	Unsure / Don't Know	Unsure / Don't Know	Unsure / Don't Know	Unsure / Don't Know	Unsure / Don't Know	Unsure / Don't Know	Unsure / Don't Know	Unsure / Don't Know	Unsure / Don't Know	Unsure / Don't Know	Unsure / Don't Know	Unsure / Don't Know	Unsure / Don't Know	Unsure / Don't Know	Unsure / Don't Know	Unsure / Don't Know	Unsure / Don't Know	Unsure / Don't Know	Unsure / Don't Know	Unsure / Don't Know	Unsure / Don't Know
2023-11-16 12:53:23	2023-11-16 13:13:37	100	1213	TRUE	2023-11-16 13:13:38		Yes, to discover papers to read,Yes, to discover important topics or threads of research for literature review,Yes, to generate summaries or explanations of papers or technical terms in papers,Yes, to ask broad questions of the field such as current trends or important findings,Yes, other:	Occasionally	No, I don't use LLMs for editing support when I am writing	Rarely	No, I don't use LLMs for directly writing text while I lead ideation	Never	No, I don't use LLMs for ideation and framing	Never	No, I don't use LLMs for data generation	Never	No, I don't use LLMs for data cleaning, analysis, or reporting	Never		Slightly useful	Slightly useful	Not at all useful	Not at all useful	Not at all useful	Not at all useful	Moderately Risky	Extremely Risky	Extremely Risky	Extremely Risky	Extremely Risky	Extremely Risky	Neutral	Somewhat Unacceptable	Unacceptable	Unacceptable	Unacceptable	Unacceptable	Uncomfortable	Somewhat uncomfortable	Uncomfortable	Somewhat uncomfortable	Uncomfortable	Uncomfortable	Somewhat comfortable	Uncomfortable	Uncomfortable	Uncomfortable	Uncomfortable	Uncomfortable
2024-01-30 8:43:39	2024-01-30 8:54:49	100	669	TRUE	2024-01-30 8:54:50		No, I don't use LLMs for information seeking or reading	Rarely	Yes, to rewrite text I've written to fix grammatical issues or awkward phrasings	Never	No, I don't use LLMs for directly writing text while I lead ideation	Never	No, I don't use LLMs for ideation and framing	Never	No, I don't use LLMs for data generation	Never	No, I don't use LLMs for data cleaning, analysis, or reporting	Never		Slightly useful	I have not use LLMs for this type of activity	I have not use LLMs for this type of activity	I have not use LLMs for this type of activity	I have not use LLMs for this type of activity	I have not use LLMs for this type of activity	Slightly Risky	Moderately Risky	Very Risky	Moderately Risky	Moderately Risky	Extremely Risky	Somewhat Acceptable	Somewhat Acceptable	Somewhat Unacceptable	Neutral	Neutral	Neutral	Somewhat comfortable	Somewhat comfortable	Uncomfortable	Neutral	Neutral	Neutral	Neutral	Neutral	Uncomfortable	Somewhat uncomfortable	Neutral	Somewhat uncomfortable
2023-11-28 18:22:25	2023-11-28 18:39:55	100	1049	TRUE	2023-11-28 18:39:56		Yes, to discover papers to read	Occasionally	Yes, other:	Very Rarely	No, I don't use LLMs for directly writing text while I lead ideation	Never	No, I don't use LLMs for ideation and framing	Never	No, I don't use LLMs for data generation	Never	No, I don't use LLMs for data cleaning, analysis, or reporting	Never		Moderately useful	Slightly useful		I have not use LLMs for this type of activity	I have not use LLMs for this type of activity		Not at all Risky	Unsure / Don't Know	Unsure / Don't Know	Not at all Risky		Unsure / Don't Know	Somewhat Acceptable	Acceptable	Acceptable	Acceptable		Acceptable	Somewhat comfortable	Somewhat comfortable		Somewhat comfortable	Somewhat comfortable		Somewhat comfortable	Somewhat comfortable	Somewhat comfortable	Somewhat comfortable	Somewhat comfortable	Somewhat comfortable
2024-02-02 4:29:08	2024-02-02 4:41:09	100	720	TRUE	2024-02-02 4:41:10		Yes, to discover papers to read,Yes, to discover important topics or threads of research for literature review,Yes, to generate summaries or explanations of papers or technical terms in papers,Yes, to ask broad questions of the field such as current trends or important findings	Rarely	Yes, to rewrite text I've written to fix grammatical issues or awkward phrasings	Very Rarely	Yes, to rewrite my writing into a different style (e.g., more formal)	Very Rarely	No, I don't use LLMs for ideation and framing	Never	No, I don't use LLMs for data generation	Never	No, I don't use LLMs for data cleaning, analysis, or reporting	Never		Extremely useful	Very useful	Moderately useful	I have not use LLMs for this type of activity	I have not use LLMs for this type of activity	I have not use LLMs for this type of activity	Very Risky	Not at all Risky	Extremely Risky	Moderately Risky	Extremely Risky	Extremely Risky	Acceptable	Acceptable	Somewhat Unacceptable	Neutral	Unacceptable	Neutral	Comfortable	Comfortable	Comfortable	Comfortable	Comfortable	Comfortable	Comfortable	Comfortable	Uncomfortable	Uncomfortable	Uncomfortable	Uncomfortable
2024-01-26 2:07:18	2024-01-26 2:18:03	100	645	TRUE	2024-01-26 2:18:04		No, I don't use LLMs for information seeking or reading	Rarely	Yes, to look up synonyms when I'm writing papers,Yes, to rewrite text I've written to fix grammatical issues or awkward phrasings,Yes, to support paper formatting (e.g., LaTeX, formatting tables or formulas),Yes, other:	Frequently	No, I don't use LLMs for directly writing text while I lead ideation	Never	Yes, to get inspiration for methods or approaches to use for a given problem	Very Rarely	No, I don't use LLMs for data generation	Never	No, I don't use LLMs for data cleaning, analysis, or reporting	Never		Slightly useful	Extremely useful	Slightly useful	Moderately useful	Not at all useful	Not at all useful	Very Risky	Slightly Risky	Extremely Risky	Not at all Risky	Moderately Risky	Very Risky	Acceptable	Acceptable	Somewhat Unacceptable	Neutral	Somewhat Unacceptable	Somewhat Unacceptable	Comfortable	Comfortable	Neutral	Somewhat comfortable	Comfortable	Somewhat uncomfortable	Comfortable	Comfortable	Uncomfortable	Uncomfortable	Uncomfortable	Uncomfortable
2024-01-25 20:13:43	2024-01-25 20:22:54	57	551	FALSE	2024-02-01 20:22:55		Yes, to ask broad questions of the field such as current trends or important findings	Occasionally	Yes, to look up synonyms when I'm writing papers,Yes, to rewrite text I've written to fix grammatical issues or awkward phrasings	Occasionally	Yes, to rewrite my writing into a different style (e.g., more formal),No, I don't use LLMs for directly writing text while I lead ideation	Occasionally	No, I don't use LLMs for ideation and framing	Never	No, I don't use LLMs for data generation	Never	No, I don't use LLMs for data cleaning, analysis, or reporting	Never		Extremely useful	Very useful	Moderately useful	I have not use LLMs for this type of activity	I have not use LLMs for this type of activity	I have not use LLMs for this type of activity	Unsure / Don't Know	Moderately Risky	Very Risky	Unsure / Don't Know	Unsure / Don't Know	Unsure / Don't Know	Unsure / Don't Know	Somewhat Acceptable	Neutral	Neutral	Unsure / Don't Know	Unsure / Don't Know	Neutral	Somewhat comfortable	Somewhat comfortable	Unsure / Don't Know	Unsure / Don't Know	Unsure / Don't Know	Unsure / Don't Know	Somewhat comfortable	Somewhat comfortable	Unsure / Don't Know	Unsure / Don't Know	Unsure / Don't Know
2024-01-25 14:48:44	2024-01-25 14:53:08	100	264	TRUE	2024-01-25 14:53:09		No, I don't use LLMs for information seeking or reading	Never	No, I don't use LLMs for editing support when I am writing	Never	No, I don't use LLMs for directly writing text while I lead ideation	Never	No, I don't use LLMs for ideation and framing	Never	No, I don't use LLMs for data generation	Never	No, I don't use LLMs for data cleaning, analysis, or reporting	Never		I have not use LLMs for this type of activity	I have not use LLMs for this type of activity	I have not use LLMs for this type of activity	I have not use LLMs for this type of activity	I have not use LLMs for this type of activity	I have not use LLMs for this type of activity	Unsure / Don't Know	Unsure / Don't Know	Unsure / Don't Know	Unsure / Don't Know	Unsure / Don't Know	Unsure / Don't Know	Unsure / Don't Know	Unsure / Don't Know	Unsure / Don't Know	Unsure / Don't Know	Unsure / Don't Know	Unsure / Don't Know	Unsure / Don't Know	Unsure / Don't Know	Unsure / Don't Know	Unsure / Don't Know	Unsure / Don't Know	Unsure / Don't Know	Unsure / Don't Know	Unsure / Don't Know	Unsure / Don't Know	Unsure / Don't Know	Unsure / Don't Know	Unsure / Don't Know
2024-01-25 12:56:33	2024-01-25 13:03:16	100	402	TRUE	2024-01-25 13:03:17		Yes, to discover important topics or threads of research for literature review	Occasionally	Yes, to look up synonyms when I'm writing papers,Yes, to rewrite text I've written to fix grammatical issues or awkward phrasings	Occasionally	Yes, to rewrite my writing into a different style (e.g., more formal)	Occasionally	Yes, to brainstorm research topics or questions to work on,Yes, to get inspiration for methods or approaches to use for a given problem	Rarely	No, I don't use LLMs for data generation	Never	No, I don't use LLMs for data cleaning, analysis, or reporting	Never		Very useful	Slightly useful	Slightly useful	Slightly useful	I have not use LLMs for this type of activity	I have not use LLMs for this type of activity	Extremely Risky	Extremely Risky	Extremely Risky	Extremely Risky	Unsure / Don't Know	Unsure / Don't Know	Somewhat Acceptable	Acceptable	Somewhat Unacceptable	Somewhat Unacceptable	Unacceptable	Unacceptable	Neutral	Neutral	Neutral	Neutral	Uncomfortable	Uncomfortable	Neutral	Neutral	Neutral	Neutral	Uncomfortable	Uncomfortable
2024-01-26 2:36:50	2024-01-26 3:13:08	100	2177	TRUE	2024-01-26 3:13:08		Yes, to discover papers to read,Yes, to discover important topics or threads of research for literature review,Yes, to generate summaries or explanations of papers or technical terms in papers,Yes, to ask broad questions of the field such as current trends or important findings,Yes, other:	Frequently	Yes, to look up synonyms when I'm writing papers,Yes, to rewrite text I've written to fix grammatical issues or awkward phrasings,Yes, other:	Occasionally	Yes, to draft paragraphs from ideas or bullet points,Yes, to rewrite my writing into a different style (e.g., more formal)	Occasionally	Yes, to brainstorm research topics or questions to work on,Yes, to come up with new ways to frame a paper, including titles and abstracts,Yes, to get inspiration for methods or approaches to use for a given problem	Frequently	No, I don't use LLMs for data generation	Never	No, I don't use LLMs for data cleaning, analysis, or reporting	Never		Very useful	Extremely useful	Very useful	Extremely useful	I have not use LLMs for this type of activity	I have not use LLMs for this type of activity	Very Risky	Moderately Risky	Extremely Risky	Slightly Risky	Unsure / Don't Know	Unsure / Don't Know	Acceptable	Acceptable	Somewhat Acceptable	Acceptable	Unsure / Don't Know	Unsure / Don't Know	Comfortable	Comfortable	Comfortable	Comfortable	Unsure / Don't Know	Unsure / Don't Know	Comfortable	Comfortable	Comfortable	Comfortable	Unsure / Don't Know	Unsure / Don't Know
2024-01-27 2:21:57	2024-01-27 2:33:53	100	715	TRUE	2024-01-27 2:33:54		Yes, to ask broad questions of the field such as current trends or important findings	Occasionally	Yes, to look up synonyms when I'm writing papers,Yes, to rewrite text I've written to fix grammatical issues or awkward phrasings	Frequently	Yes, to rewrite my writing into a different style (e.g., more formal)	Very Rarely	Yes, to get inspiration for methods or approaches to use for a given problem	Rarely	Yes, to automatically produce both training examples and labels	Rarely	No, I don't use LLMs for data cleaning, analysis, or reporting	Never		Moderately useful	Very useful	Slightly useful	Moderately useful	Moderately useful	I have not use LLMs for this type of activity	Moderately Risky	Slightly Risky	Very Risky	Slightly Risky	Slightly Risky	Extremely Risky	Acceptable	Acceptable	Neutral	Acceptable	Neutral	Acceptable	Comfortable	Comfortable	Somewhat uncomfortable	Somewhat comfortable	Somewhat comfortable	Somewhat uncomfortable	Comfortable	Comfortable	Somewhat uncomfortable	Somewhat uncomfortable	Somewhat comfortable	Comfortable
2024-01-25 12:49:57	2024-01-25 13:07:43	100	1065	TRUE	2024-01-25 13:07:44		No, I don't use LLMs for information seeking or reading	Very Rarely	Yes, to rewrite text I've written to fix grammatical issues or awkward phrasings,Yes, to support paper formatting (e.g., LaTeX, formatting tables or formulas)	Rarely	No, I don't use LLMs for directly writing text while I lead ideation	Never	Yes, to brainstorm research topics or questions to work on	Rarely	No, I don't use LLMs for data generation	Never	Yes, to clean and reformat datasets	Rarely		Moderately useful	Very useful	Not at all useful	Moderately useful	Not at all useful	Very useful	Very Risky	Slightly Risky	Extremely Risky	Moderately Risky	Extremely Risky	Slightly Risky	Somewhat Acceptable	Somewhat Acceptable	Unacceptable	Unacceptable	Unacceptable	Unacceptable	Comfortable	Comfortable	Uncomfortable	Uncomfortable	Uncomfortable	Somewhat comfortable	Comfortable	Comfortable	Comfortable	Comfortable	Comfortable	Comfortable
2024-01-25 7:41:13	2024-01-25 7:46:51	100	337	TRUE	2024-01-25 7:46:52		No, I don't use LLMs for information seeking or reading	Never	No, I don't use LLMs for editing support when I am writing	Never	No, I don't use LLMs for directly writing text while I lead ideation	Never	No, I don't use LLMs for ideation and framing	Never	No, I don't use LLMs for data generation	Never	No, I don't use LLMs for data cleaning, analysis, or reporting	Never		I have not use LLMs for this type of activity	I have not use LLMs for this type of activity	I have not use LLMs for this type of activity	I have not use LLMs for this type of activity	I have not use LLMs for this type of activity	I have not use LLMs for this type of activity	Moderately Risky	Slightly Risky		Moderately Risky	Slightly Risky	Very Risky	Somewhat Acceptable	Somewhat Acceptable	Somewhat Acceptable	Acceptable	Somewhat Acceptable	Unacceptable	Somewhat uncomfortable	Somewhat uncomfortable	Somewhat uncomfortable	Uncomfortable	Uncomfortable	Uncomfortable	Uncomfortable	Uncomfortable	Uncomfortable	Uncomfortable	Uncomfortable	Uncomfortable
2024-01-25 8:16:02	2024-01-25 8:23:11	100	429	TRUE	2024-01-25 8:23:12		Yes, to discover papers to read	Rarely	Yes, to look up synonyms when I'm writing papers,Yes, to rewrite text I've written to fix grammatical issues or awkward phrasings,Yes, to support paper formatting (e.g., LaTeX, formatting tables or formulas)	Very Frequently	Yes, to shorten or summarize a long piece of text that I wrote,Yes, to draft paragraphs from ideas or bullet points	Occasionally	No, I don't use LLMs for ideation and framing	Never	No, I don't use LLMs for data generation	Never	No, I don't use LLMs for data cleaning, analysis, or reporting	Never		Slightly useful	Extremely useful	Very useful	I have not use LLMs for this type of activity	I have not use LLMs for this type of activity	I have not use LLMs for this type of activity	Extremely Risky	Slightly Risky	Moderately Risky	Moderately Risky	Extremely Risky	Slightly Risky	Acceptable	Acceptable	Acceptable	Acceptable	Acceptable	Acceptable	Neutral	Comfortable	Comfortable	Somewhat uncomfortable	Uncomfortable	Uncomfortable	Comfortable	Somewhat uncomfortable	Uncomfortable	Unsure / Don't Know	Unsure / Don't Know	Unsure / Don't Know
2024-01-26 1:02:52	2024-01-26 1:09:58	71	425	FALSE	2024-02-02 1:10:00		Yes, to ask broad questions of the field such as current trends or important findings	Very Rarely	Yes, to rewrite text I've written to fix grammatical issues or awkward phrasings	Frequently	No, I don't use LLMs for directly writing text while I lead ideation	Never	Yes, to come up with new ways to frame a paper, including titles and abstracts	Rarely	No, I don't use LLMs for data generation	Never	No, I don't use LLMs for data cleaning, analysis, or reporting	Never		Slightly useful	Moderately useful	Not at all useful	Slightly useful	Not at all useful	Not at all useful	Moderately Risky	Slightly Risky	Very Risky	Extremely Risky	Extremely Risky	Extremely Risky	Acceptable	Acceptable	Unacceptable	Somewhat Unacceptable	Unacceptable	Unacceptable	Somewhat comfortable	Somewhat comfortable	Uncomfortable	Uncomfortable	Uncomfortable	Uncomfortable	Somewhat comfortable	Somewhat comfortable	Uncomfortable	Uncomfortable	Uncomfortable	Uncomfortable
2024-01-26 1:25:31	2024-01-26 1:30:05	57	273	FALSE	2024-02-02 1:30:07		No, I don't use LLMs for information seeking or reading	Never	No, I don't use LLMs for editing support when I am writing	Never	No, I don't use LLMs for directly writing text while I lead ideation	Never	No, I don't use LLMs for ideation and framing	Never	No, I don't use LLMs for data generation	Never	No, I don't use LLMs for data cleaning, analysis, or reporting	Never		I have not use LLMs for this type of activity	I have not use LLMs for this type of activity	I have not use LLMs for this type of activity	I have not use LLMs for this type of activity	I have not use LLMs for this type of activity	I have not use LLMs for this type of activity	Unsure / Don't Know	Unsure / Don't Know	Unsure / Don't Know	Unsure / Don't Know	Unsure / Don't Know	Unsure / Don't Know	Unsure / Don't Know	Unsure / Don't Know	Unsure / Don't Know	Unsure / Don't Know	Unsure / Don't Know	Unsure / Don't Know	Unsure / Don't Know	Unsure / Don't Know	Unsure / Don't Know	Unsure / Don't Know	Unsure / Don't Know	Unsure / Don't Know	Unsure / Don't Know	Unsure / Don't Know	Unsure / Don't Know	Unsure / Don't Know	Unsure / Don't Know	Unsure / Don't Know
2024-01-25 21:21:15	2024-01-25 21:34:06	100	770	TRUE	2024-01-25 21:34:07		Yes, to discover papers to read,Yes, to generate summaries or explanations of papers or technical terms in papers	Occasionally	Yes, to look up synonyms when I'm writing papers,Yes, to rewrite text I've written to fix grammatical issues or awkward phrasings,Yes, to support paper formatting (e.g., LaTeX, formatting tables or formulas)	Frequently	Yes, to shorten or summarize a long piece of text that I wrote,Yes, to draft paragraphs from ideas or bullet points,Yes, to rewrite my writing into a different style (e.g., more formal)	Rarely	Yes, to come up with new ways to frame a paper, including titles and abstracts	Occasionally	No, I don't use LLMs for data generation	Never	No, I don't use LLMs for data cleaning, analysis, or reporting	Never		Moderately useful	Moderately useful	Moderately useful	Moderately useful	I have not use LLMs for this type of activity	I have not use LLMs for this type of activity	Moderately Risky	Moderately Risky	Moderately Risky	Moderately Risky	Unsure / Don't Know	Unsure / Don't Know	Acceptable	Somewhat Unacceptable	Somewhat Unacceptable	Somewhat Unacceptable	Somewhat Acceptable	Neutral	Comfortable	Comfortable	Neutral	Neutral	Somewhat comfortable	Neutral	Neutral	Neutral	Unsure / Don't Know	Unsure / Don't Know	Neutral	Neutral
2024-02-15 6:53:18	2024-02-15 7:05:30	100	732	TRUE	2024-02-15 7:05:31		Yes, to generate summaries or explanations of papers or technical terms in papers	Frequently	Yes, to look up synonyms when I'm writing papers	Frequently	Yes, to rewrite my writing into a different style (e.g., more formal)	Frequently	Yes, to get inspiration for methods or approaches to use for a given problem	Very Frequently	Yes, to automatically produce both training examples and labels	Frequently	Yes, to simulate human ratings of an existing dataset for evaluation (e.g., summarization quality)	Very Frequently		Very useful	Very useful	Very useful	Very useful	Very useful	Very useful	Not at all Risky	Not at all Risky	Not at all Risky	Moderately Risky	Not at all Risky	Slightly Risky	Somewhat Unacceptable	Acceptable	Acceptable	Acceptable	Somewhat Acceptable	Acceptable	Comfortable	Comfortable	Comfortable	Comfortable	Somewhat comfortable	Comfortable	Comfortable	Comfortable	Comfortable	Comfortable	Neutral	Comfortable
2024-01-26 11:15:54	2024-01-26 11:27:08	100	674	TRUE	2024-01-26 11:27:09		No, I don't use LLMs for information seeking or reading	Very Rarely	Yes, to rewrite text I've written to fix grammatical issues or awkward phrasings,Yes, to support paper formatting (e.g., LaTeX, formatting tables or formulas)	Rarely	No, I don't use LLMs for directly writing text while I lead ideation	Never	No, I don't use LLMs for ideation and framing	Never	No, I don't use LLMs for data generation	Never	No, I don't use LLMs for data cleaning, analysis, or reporting	Never		Not at all useful	Very useful	Not at all useful	Slightly useful	Slightly useful	Slightly useful	Extremely Risky	Slightly Risky	Extremely Risky	Very Risky	Very Risky	Moderately Risky	Neutral	Acceptable	Neutral	Neutral	Neutral	Neutral	Comfortable	Comfortable	Comfortable	Comfortable	Comfortable	Comfortable	Comfortable	Comfortable	Comfortable	Comfortable	Comfortable	Comfortable
2024-01-25 12:50:41	2024-01-25 13:01:54	100	672	TRUE	2024-01-25 13:01:54		Yes, to generate summaries or explanations of papers or technical terms in papers	Occasionally	Yes, to rewrite text I've written to fix grammatical issues or awkward phrasings	Frequently	Yes, to shorten or summarize a long piece of text that I wrote,Yes, to draft paragraphs from ideas or bullet points,Yes, to rewrite my writing into a different style (e.g., more formal)	Frequently	Yes, to come up with new ways to frame a paper, including titles and abstracts	Very Rarely	No, I don't use LLMs for data generation	Never	No, I don't use LLMs for data cleaning, analysis, or reporting	Never		Very useful	Extremely useful	Extremely useful	Moderately useful	Very useful	Moderately useful	Very Risky	Moderately Risky	Moderately Risky	Moderately Risky	Very Risky	Moderately Risky	Unsure / Don't Know	Unsure / Don't Know	Unsure / Don't Know	Unsure / Don't Know	Unsure / Don't Know	Unsure / Don't Know	Comfortable	Comfortable	Comfortable	Comfortable	Comfortable	Comfortable	Somewhat uncomfortable	Somewhat comfortable	Somewhat comfortable	Neutral	Neutral	Somewhat comfortable
2024-01-25 16:24:13	2024-01-25 16:30:05	100	352	TRUE	2024-01-25 16:30:06		Yes, to discover papers to read	Rarely	No, I don't use LLMs for editing support when I am writing	Never	No, I don't use LLMs for directly writing text while I lead ideation	Never	No, I don't use LLMs for ideation and framing	Never	No, I don't use LLMs for data generation	Never	No, I don't use LLMs for data cleaning, analysis, or reporting	Never		Moderately useful	Moderately useful	Not at all useful	Slightly useful	I have not use LLMs for this type of activity	I have not use LLMs for this type of activity	Moderately Risky	Very Risky	Extremely Risky	Very Risky	Unsure / Don't Know	Unsure / Don't Know	Acceptable	Acceptable	Somewhat Acceptable	Somewhat Acceptable	Acceptable	Unsure / Don't Know	Comfortable	Comfortable	Comfortable	Comfortable	Unsure / Don't Know	Unsure / Don't Know	Comfortable	Comfortable	Somewhat uncomfortable	Neutral	Comfortable	Unsure / Don't Know
2024-01-27 10:14:17	2024-01-27 10:23:39	100	562	TRUE	2024-01-27 10:23:40		Yes, to discover papers to read	Occasionally	Yes, other:	Frequently	No, I don't use LLMs for directly writing text while I lead ideation	Never	No, I don't use LLMs for ideation and framing	Never	No, I don't use LLMs for data generation	Never	No, I don't use LLMs for data cleaning, analysis, or reporting	Never		Slightly useful	Very useful	Not at all useful	Not at all useful	I have not use LLMs for this type of activity	I have not use LLMs for this type of activity	Slightly Risky	Not at all Risky	Extremely Risky	Very Risky	Moderately Risky	Very Risky	Acceptable	Acceptable	Somewhat Acceptable	Neutral	Somewhat Acceptable	Somewhat Acceptable	Comfortable	Comfortable	Uncomfortable	Uncomfortable	Unsure / Don't Know	Unsure / Don't Know	Comfortable	Comfortable	Uncomfortable	Uncomfortable	Unsure / Don't Know	Unsure / Don't Know
2024-01-25 13:17:51	2024-01-25 13:28:27	57	635	FALSE	2024-02-01 13:28:34		No, I don't use LLMs for information seeking or reading	Never	No, I don't use LLMs for editing support when I am writing	Never	No, I don't use LLMs for directly writing text while I lead ideation	Never	No, I don't use LLMs for ideation and framing	Never	No, I don't use LLMs for data generation	Never	No, I don't use LLMs for data cleaning, analysis, or reporting	Never		I have not use LLMs for this type of activity	I have not use LLMs for this type of activity	I have not use LLMs for this type of activity	I have not use LLMs for this type of activity	I have not use LLMs for this type of activity	I have not use LLMs for this type of activity	Unsure / Don't Know	Unsure / Don't Know	Unsure / Don't Know	Unsure / Don't Know	Unsure / Don't Know	Unsure / Don't Know	Unsure / Don't Know	Unsure / Don't Know	Unsure / Don't Know	Unsure / Don't Know	Unsure / Don't Know	Unsure / Don't Know	Unsure / Don't Know	Unsure / Don't Know	Unsure / Don't Know	Unsure / Don't Know	Unsure / Don't Know	Unsure / Don't Know	Unsure / Don't Know	Unsure / Don't Know	Unsure / Don't Know	Unsure / Don't Know	Unsure / Don't Know	Unsure / Don't Know
2024-01-25 23:27:12	2024-01-25 23:33:41	100	389	TRUE	2024-01-25 23:33:42		No, I don't use LLMs for information seeking or reading	Never	Yes, to look up synonyms when I'm writing papers,Yes, to rewrite text I've written to fix grammatical issues or awkward phrasings	Very Rarely	No, I don't use LLMs for directly writing text while I lead ideation	Never	No, I don't use LLMs for ideation and framing	Never	No, I don't use LLMs for data generation	Never	No, I don't use LLMs for data cleaning, analysis, or reporting	Never		Not at all useful	Slightly useful	Not at all useful	Not at all useful	Not at all useful	Moderately useful	Moderately Risky	Moderately Risky	Very Risky	Moderately Risky	Extremely Risky	Slightly Risky	Neutral	Neutral	Somewhat Unacceptable	Neutral	Somewhat Unacceptable	Neutral	Neutral	Neutral	Neutral	Neutral	Neutral	Neutral	Neutral	Neutral	Neutral	Neutral	Neutral	Neutral
2024-03-25 10:27:40	2024-03-26 4:31:14	100	65013	TRUE	2024-03-26 4:31:15		Yes, to ask broad questions of the field such as current trends or important findings	Very Rarely	Yes, to look up synonyms when I'm writing papers,Yes, to rewrite text I've written to fix grammatical issues or awkward phrasings,Yes, to support paper formatting (e.g., LaTeX, formatting tables or formulas)	Occasionally	Yes, to shorten or summarize a long piece of text that I wrote,Yes, to draft paragraphs from ideas or bullet points,Yes, to rewrite my writing into a different style (e.g., more formal)	Rarely	No, I don't use LLMs for ideation and framing	Never	No, I don't use LLMs for data generation	Never	Yes, to clean and reformat datasets,Yes, to conduct statistical reporting of quantitative data	Frequently		Moderately useful	Extremely useful	Extremely useful	I have not use LLMs for this type of activity	I have not use LLMs for this type of activity	Extremely useful	Moderately Risky	Not at all Risky	Slightly Risky	Very Risky	Extremely Risky	Slightly Risky	Somewhat Acceptable	Acceptable	Somewhat Acceptable	Neutral	Somewhat Unacceptable	Acceptable	Neutral	Comfortable	Comfortable	Neutral	Neutral	Comfortable	Somewhat comfortable	Comfortable	Comfortable	Somewhat comfortable	Comfortable	Comfortable
2024-01-26 0:16:53	2024-01-26 0:33:19	100	985	TRUE	2024-01-26 0:33:20		Yes, to discover papers to read,Yes, to discover important topics or threads of research for literature review	Very Rarely	Yes, to look up synonyms when I'm writing papers,Yes, to rewrite text I've written to fix grammatical issues or awkward phrasings,Yes, other:	Very Rarely	Yes, to rewrite my writing into a different style (e.g., more formal)	Very Rarely	Yes, to get inspiration for methods or approaches to use for a given problem	Very Rarely	No, I don't use LLMs for data generation	Never	No, I don't use LLMs for data cleaning, analysis, or reporting	Never		Moderately useful	Very useful	Slightly useful	Slightly useful	Not at all useful	Not at all useful	Extremely Risky	Slightly Risky	Very Risky	Moderately Risky	Extremely Risky	Very Risky	Acceptable	Acceptable	Acceptable	Somewhat Acceptable	Neutral	Neutral	Comfortable	Comfortable	Comfortable	Somewhat comfortable	Somewhat comfortable	Somewhat comfortable	Somewhat comfortable	Comfortable	Somewhat comfortable	Somewhat uncomfortable	Uncomfortable	Somewhat uncomfortable
2024-01-25 12:58:17	2024-01-25 13:07:10	100	533	TRUE	2024-01-25 13:07:11		Yes, to generate summaries or explanations of papers or technical terms in papers,Yes, other:	Rarely	Yes, to rewrite text I've written to fix grammatical issues or awkward phrasings	Very Rarely	Yes, to draft paragraphs from ideas or bullet points,Yes, to rewrite my writing into a different style (e.g., more formal),Yes, other:	Very Rarely	Yes, to brainstorm research topics or questions to work on,Yes, to come up with new ways to frame a paper, including titles and abstracts,Yes, other:	Frequently	No, I don't use LLMs for data generation	Never	Yes, other:	Occasionally		Slightly useful	Very useful	Slightly useful	Moderately useful	Not at all useful	Moderately useful	Very Risky	Slightly Risky	Moderately Risky	Slightly Risky	Extremely Risky	Slightly Risky	Acceptable	Acceptable	Somewhat Unacceptable	Acceptable	Acceptable	Somewhat Unacceptable	Comfortable	Comfortable	Comfortable	Comfortable	Comfortable	Comfortable	Comfortable	Comfortable	Uncomfortable	Comfortable	Comfortable	Comfortable
2024-01-25 12:59:36	2024-01-25 13:22:46	100	1389	TRUE	2024-01-25 13:22:47		No, I don't use LLMs for information seeking or reading	Never	No, I don't use LLMs for editing support when I am writing	Never	No, I don't use LLMs for directly writing text while I lead ideation	Never	No, I don't use LLMs for ideation and framing	Never	No, I don't use LLMs for data generation	Never	No, I don't use LLMs for data cleaning, analysis, or reporting	Never		Not at all useful	Not at all useful	Not at all useful	Not at all useful	Not at all useful	Not at all useful	Extremely Risky	Extremely Risky	Extremely Risky	Extremely Risky	Extremely Risky	Extremely Risky	Unacceptable	Unacceptable	Unacceptable	Unacceptable	Unacceptable	Unacceptable	Comfortable	Comfortable	Comfortable	Comfortable	Comfortable	Comfortable	Comfortable	Comfortable	Comfortable	Comfortable	Comfortable	Comfortable
2024-01-25 1:56:51	2024-01-25 2:08:30	100	699	TRUE	2024-01-25 2:08:31		Yes, to discover papers to read	Very Rarely	No, I don't use LLMs for editing support when I am writing	Never	No, I don't use LLMs for directly writing text while I lead ideation	Never	No, I don't use LLMs for ideation and framing	Very Rarely	No, I don't use LLMs for data generation	Never	No, I don't use LLMs for data cleaning, analysis, or reporting	Never		Very useful	I have not use LLMs for this type of activity	I have not use LLMs for this type of activity	I have not use LLMs for this type of activity	I have not use LLMs for this type of activity	I have not use LLMs for this type of activity	Moderately Risky	Slightly Risky	Very Risky	Not at all Risky	Slightly Risky	Not at all Risky	Neutral	Acceptable	Acceptable	Acceptable	Neutral	Neutral	Comfortable	Somewhat comfortable	Somewhat comfortable	Neutral	Unsure / Don't Know	Unsure / Don't Know	Comfortable	Unsure / Don't Know	Unsure / Don't Know	Unsure / Don't Know	Unsure / Don't Know	Unsure / Don't Know
2024-01-25 3:48:38	2024-01-25 4:37:45	100	2946	TRUE	2024-01-25 4:37:46		No, I don't use LLMs for information seeking or reading	Very Rarely	Yes, to look up synonyms when I'm writing papers,Yes, to rewrite text I've written to fix grammatical issues or awkward phrasings,Yes, to support paper formatting (e.g., LaTeX, formatting tables or formulas)	Frequently	No, I don't use LLMs for directly writing text while I lead ideation	Never	Yes, to brainstorm research topics or questions to work on	Occasionally	No, I don't use LLMs for data generation	Never	No, I don't use LLMs for data cleaning, analysis, or reporting	Never		Slightly useful	Extremely useful	I have not use LLMs for this type of activity	Very useful	I have not use LLMs for this type of activity	I have not use LLMs for this type of activity	Extremely Risky	Slightly Risky	Extremely Risky	Moderately Risky	Extremely Risky	Extremely Risky	Acceptable	Acceptable	Acceptable	Neutral	Neutral	Neutral	Somewhat comfortable	Comfortable	Neutral	Unsure / Don't Know	Uncomfortable	Neutral	Uncomfortable	Uncomfortable	Uncomfortable	Uncomfortable	Uncomfortable	Uncomfortable
2023-11-28 2:03:16	2023-11-28 2:12:53	100	576	TRUE	2023-11-28 2:12:53		Yes, to discover papers to read,Yes, other:	Frequently	Yes, to look up synonyms when I'm writing papers,Yes, to rewrite text I've written to fix grammatical issues or awkward phrasings,Yes, other:	Occasionally	Yes, to rewrite my writing into a different style (e.g., more formal)	Rarely	No, I don't use LLMs for ideation and framing	Never	No, I don't use LLMs for data generation	Never	Yes, to clean and reformat datasets,No, I don't use LLMs for data cleaning, analysis, or reporting	Never		Moderately useful	Moderately useful	Not at all useful	Not at all useful	Not at all useful	Moderately useful	Moderately Risky	Moderately Risky	Moderately Risky	Moderately Risky	Moderately Risky	Slightly Risky	Somewhat Acceptable	Somewhat Unacceptable	Somewhat Unacceptable	Somewhat Unacceptable	Unacceptable	Somewhat Acceptable	Somewhat comfortable	Somewhat uncomfortable	Somewhat uncomfortable	Somewhat uncomfortable	Somewhat uncomfortable	Somewhat comfortable	Somewhat comfortable	Somewhat uncomfortable	Somewhat uncomfortable	Somewhat uncomfortable	Somewhat uncomfortable	Somewhat comfortable
2024-01-26 12:03:05	2024-01-26 12:15:01	97	715	FALSE	2024-02-02 12:15:05		No, I don't use LLMs for information seeking or reading	Very Rarely	Yes, to rewrite text I've written to fix grammatical issues or awkward phrasings	Very Rarely	No, I don't use LLMs for directly writing text while I lead ideation	Never	No, I don't use LLMs for ideation and framing	Never	No, I don't use LLMs for data generation	Never	No, I don't use LLMs for data cleaning, analysis, or reporting	Never		Not at all useful	Not at all useful	Not at all useful	Not at all useful	Not at all useful	Not at all useful	Extremely Risky	Extremely Risky	Extremely Risky	Extremely Risky	Extremely Risky	Extremely Risky	Unsure / Don't Know	Unsure / Don't Know	Unsure / Don't Know	Unsure / Don't Know	Unsure / Don't Know	Unsure / Don't Know	Unsure / Don't Know	Unsure / Don't Know	Unsure / Don't Know	Unsure / Don't Know	Unsure / Don't Know	Unsure / Don't Know	Unsure / Don't Know	Unsure / Don't Know	Unsure / Don't Know	Unsure / Don't Know	Unsure / Don't Know	Unsure / Don't Know
2024-01-25 4:25:23	2024-01-25 4:37:26	100	722	TRUE	2024-01-25 4:37:27		Yes, to generate summaries or explanations of papers or technical terms in papers,Yes, to ask broad questions of the field such as current trends or important findings	Occasionally	Yes, to rewrite text I've written to fix grammatical issues or awkward phrasings,Yes, to support paper formatting (e.g., LaTeX, formatting tables or formulas)	Occasionally	No, I don't use LLMs for directly writing text while I lead ideation	Never	Yes, to get inspiration for methods or approaches to use for a given problem	Very Rarely	No, I don't use LLMs for data generation	Never	Yes, to clean and reformat datasets,Yes, to conduct statistical reporting of quantitative data	Rarely		Very useful	Very useful	Slightly useful	Moderately useful	I have not use LLMs for this type of activity	Extremely useful	Moderately Risky	Moderately Risky	Very Risky	Slightly Risky	Extremely Risky	Very Risky	Acceptable	Somewhat Acceptable	Unacceptable	Neutral	Unacceptable	Acceptable	Comfortable	Comfortable	Comfortable	Comfortable	Comfortable		Somewhat uncomfortable	Uncomfortable	Uncomfortable	Uncomfortable	Uncomfortable	Somewhat comfortable
2023-11-28 7:12:17	2023-11-28 7:19:03	57	405	FALSE	2023-12-05 7:19:05		Yes, to discover papers to read,Yes, to discover important topics or threads of research for literature review,Yes, to ask broad questions of the field such as current trends or important findings	Frequently	Yes, to look up synonyms when I'm writing papers,Yes, to rewrite text I've written to fix grammatical issues or awkward phrasings,Yes, to support paper formatting (e.g., LaTeX, formatting tables or formulas)	Frequently	Yes, to shorten or summarize a long piece of text that I wrote,Yes, to draft paragraphs from ideas or bullet points,Yes, to rewrite my writing into a different style (e.g., more formal)	Frequently	Yes, to brainstorm research topics or questions to work on,Yes, to come up with new ways to frame a paper, including titles and abstracts,Yes, to get inspiration for methods or approaches to use for a given problem	Frequently	Yes, to generate synthetic interviews and survey responses,Yes, to automatically produce training labels given example data,Yes, to automatically produce both training examples and labels	Frequently	Yes, to clean and reformat datasets,Yes, to conduct statistical reporting of quantitative data,Yes, to conduct analysis and reporting of qualitative data (e.g., of participant interviews),Yes, to simulate human ratings of an existing dataset for evaluation (e.g., summarization quality)	Frequently		Very useful	Very useful			Very useful	Very useful	Not at all Risky	Not at all Risky		Not at all Risky			Acceptable	Somewhat Acceptable	Acceptable		Acceptable		Comfortable		Comfortable		Comfortable	Comfortable	Comfortable	Comfortable	Comfortable			Comfortable
2024-01-25 12:48:46	2024-01-25 13:01:01	100	734	TRUE	2024-01-25 13:01:03		Yes, to generate summaries or explanations of papers or technical terms in papers	Frequently	No, I don't use LLMs for editing support when I am writing	Very Rarely	Yes, to shorten or summarize a long piece of text that I wrote	Very Rarely	Yes, to get inspiration for methods or approaches to use for a given problem	Occasionally	No, I don't use LLMs for data generation	Very Rarely	Yes, to simulate human ratings of an existing dataset for evaluation (e.g., summarization quality)	Very Rarely		Moderately useful	Moderately useful	Slightly useful	Slightly useful	Slightly useful	Slightly useful	Moderately Risky	Moderately Risky	Very Risky	Slightly Risky	Slightly Risky	Slightly Risky	Acceptable	Acceptable	Acceptable	Acceptable	Somewhat Acceptable	Acceptable	Comfortable	Comfortable	Somewhat comfortable	Comfortable	Comfortable	Comfortable	Comfortable	Comfortable	Somewhat comfortable	Comfortable	Comfortable	Comfortable
2023-11-27 23:45:28	2023-11-28 0:06:26	100	1258	TRUE	2023-11-28 0:06:27		Yes, to discover important topics or threads of research for literature review,Yes, to ask broad questions of the field such as current trends or important findings	Frequently	Yes, to look up synonyms when I'm writing papers,Yes, to rewrite text I've written to fix grammatical issues or awkward phrasings,Yes, to support paper formatting (e.g., LaTeX, formatting tables or formulas)	Frequently	Yes, to shorten or summarize a long piece of text that I wrote,Yes, to draft paragraphs from ideas or bullet points,Yes, to rewrite my writing into a different style (e.g., more formal)	Occasionally	Yes, to brainstorm research topics or questions to work on,Yes, to come up with new ways to frame a paper, including titles and abstracts,Yes, to get inspiration for methods or approaches to use for a given problem	Occasionally	Yes, to automatically produce training labels given example data,Yes, to automatically produce both training examples and labels	Never	Yes, to clean and reformat datasets,Yes, to conduct statistical reporting of quantitative data,Yes, to conduct analysis and reporting of qualitative data (e.g., of participant interviews)	Frequently		Moderately useful	Very useful	Slightly useful	Moderately useful	Slightly useful	Extremely useful	Slightly Risky	Not at all Risky	Very Risky	Moderately Risky	Very Risky	Moderately Risky	Somewhat Acceptable	Somewhat Acceptable	Unacceptable	Somewhat Unacceptable	Neutral	Neutral	Somewhat uncomfortable	Somewhat comfortable	Somewhat uncomfortable	Somewhat uncomfortable	Somewhat uncomfortable	Neutral	Neutral	Neutral	Uncomfortable	Neutral	Uncomfortable
2023-11-16 2:48:23	2023-11-16 3:01:15	100	772	TRUE	2023-11-16 3:01:16		Yes, to discover papers to read,Yes, to ask broad questions of the field such as current trends or important findings,Yes, other:	Very Frequently	No, I don't use LLMs for editing support when I am writing	Never	Yes, to shorten or summarize a long piece of text that I wrote,Yes, to draft paragraphs from ideas or bullet points,Yes, to rewrite my writing into a different style (e.g., more formal)	Occasionally	Yes, to get inspiration for methods or approaches to use for a given problem	Very Rarely	Yes, to automatically produce training labels given example data	Very Rarely	Yes, to clean and reformat datasets,Yes, to conduct statistical reporting of quantitative data	Very Rarely		Moderately useful	I have not use LLMs for this type of activity	Slightly useful	Moderately useful	Slightly useful	Slightly useful	Moderately Risky	Moderately Risky	Moderately Risky	Slightly Risky	Extremely Risky	Extremely Risky	Acceptable	Acceptable	Neutral	Acceptable	Acceptable	Neutral	Comfortable	Comfortable	Somewhat uncomfortable	Somewhat comfortable	Somewhat uncomfortable	Somewhat uncomfortable	Comfortable	Comfortable	Comfortable	Comfortable	Comfortable	Comfortable
2023-11-28 12:34:12	2023-11-28 12:42:56	100	523	TRUE	2023-11-28 12:42:57		Yes, to ask broad questions of the field such as current trends or important findings	Occasionally	Yes, to rewrite text I've written to fix grammatical issues or awkward phrasings,Yes, to support paper formatting (e.g., LaTeX, formatting tables or formulas)	Very Frequently	Yes, to shorten or summarize a long piece of text that I wrote,Yes, to rewrite my writing into a different style (e.g., more formal)	Occasionally	Yes, to brainstorm research topics or questions to work on	Occasionally	No, I don't use LLMs for data generation	Never	Yes, to clean and reformat datasets,Yes, to conduct statistical reporting of quantitative data	Rarely		Moderately useful	Extremely useful	Slightly useful	Moderately useful	Moderately useful	Very useful	Extremely Risky	Extremely Risky	Extremely Risky	Moderately Risky	Very Risky	Moderately Risky	Somewhat Acceptable	Somewhat Acceptable	Neutral	Somewhat Acceptable	Neutral	Somewhat Acceptable	Somewhat comfortable	Somewhat comfortable	Somewhat comfortable	Somewhat comfortable	Somewhat comfortable		Somewhat comfortable	Somewhat comfortable	Somewhat comfortable	Somewhat comfortable	Somewhat comfortable	Somewhat comfortable
2023-11-15 3:17:31	2023-11-15 3:30:09	100	758	TRUE	2023-11-15 3:30:09		Yes, to generate summaries or explanations of papers or technical terms in papers,Yes, to ask broad questions of the field such as current trends or important findings,Yes, other:	Very Frequently	Yes, to rewrite text I've written to fix grammatical issues or awkward phrasings,Yes, to support paper formatting (e.g., LaTeX, formatting tables or formulas),Yes, other:	Very Frequently	No, I don't use LLMs for directly writing text while I lead ideation	Never	Yes, to brainstorm research topics or questions to work on,Yes, to come up with new ways to frame a paper, including titles and abstracts,Yes, to get inspiration for methods or approaches to use for a given problem,Yes, other:	Occasionally	Yes, to automatically produce training labels given example data,Yes, to automatically produce both training examples and labels,Yes, other:	Occasionally	Yes, to clean and reformat datasets,Yes, to simulate human ratings of an existing dataset for evaluation (e.g., summarization quality)	Occasionally		Moderately useful	Very useful	Not at all useful	Extremely useful	Very useful	Moderately useful	Extremely Risky	Not at all Risky	Extremely Risky	Slightly Risky	Slightly Risky	Slightly Risky	Acceptable	Acceptable	Unacceptable	Acceptable	Acceptable	Acceptable	Comfortable	Comfortable	Comfortable	Comfortable	Comfortable	Comfortable	Comfortable	Comfortable	Comfortable	Comfortable	Comfortable	Comfortable
2023-11-16 4:48:54	2023-11-16 4:53:47	57	293	FALSE	2023-11-23 4:53:50		Yes, to discover papers to read,Yes, to discover important topics or threads of research for literature review	Very Frequently	Yes, to support paper formatting (e.g., LaTeX, formatting tables or formulas)	Very Frequently	Yes, to draft paragraphs from ideas or bullet points	Frequently	Yes, to brainstorm research topics or questions to work on,Yes, to come up with new ways to frame a paper, including titles and abstracts	Frequently	Yes, to generate synthetic interviews and survey responses,Yes, to automatically produce training labels given example data	Frequently	Yes, to conduct statistical reporting of quantitative data	Frequently		Extremely useful	Extremely useful	Extremely useful	Extremely useful	Extremely useful	Extremely useful	Slightly Risky	Slightly Risky	Slightly Risky	Slightly Risky	Slightly Risky	Slightly Risky	Neutral	Neutral	Neutral	Neutral	Neutral	Neutral							Comfortable	Comfortable	Comfortable	Comfortable	Comfortable
2024-01-26 13:33:05	2024-01-26 13:52:25	100	1159	TRUE	2024-01-26 13:52:25		Yes, to discover papers to read,Yes, to discover important topics or threads of research for literature review,Yes, to generate summaries or explanations of papers or technical terms in papers,Yes, to ask broad questions of the field such as current trends or important findings	Occasionally	Yes, to look up synonyms when I'm writing papers,Yes, to rewrite text I've written to fix grammatical issues or awkward phrasings,Yes, to support paper formatting (e.g., LaTeX, formatting tables or formulas)	Occasionally	No, I don't use LLMs for directly writing text while I lead ideation	Never	Yes, to brainstorm research topics or questions to work on,Yes, to come up with new ways to frame a paper, including titles and abstracts,Yes, to get inspiration for methods or approaches to use for a given problem	Occasionally	No, I don't use LLMs for data generation	Rarely	Yes, to conduct statistical reporting of quantitative data,Yes, to conduct analysis and reporting of qualitative data (e.g., of participant interviews),Yes, to simulate human ratings of an existing dataset for evaluation (e.g., summarization quality)	Never		Very useful	Very useful	I have not use LLMs for this type of activity	Very useful	Very useful	Very useful	Not at all Risky	Slightly Risky	Very Risky	Not at all Risky	Not at all Risky	Slightly Risky	Neutral	Neutral	Neutral	Somewhat Unacceptable	Somewhat Unacceptable	Somewhat Unacceptable	Neutral	Neutral	Somewhat uncomfortable	Somewhat comfortable	Somewhat comfortable	Somewhat uncomfortable	Neutral	Neutral	Uncomfortable	Uncomfortable	Uncomfortable	Uncomfortable
2023-11-28 8:03:45	2023-11-28 8:13:15	100	569	TRUE	2023-11-28 8:13:16		Yes, to discover papers to read	Frequently	Yes, to rewrite text I've written to fix grammatical issues or awkward phrasings	Occasionally	No, I don't use LLMs for directly writing text while I lead ideation	Never	No, I don't use LLMs for ideation and framing	Never	No, I don't use LLMs for data generation	Never	No, I don't use LLMs for data cleaning, analysis, or reporting	Never		Very useful	Slightly useful	I have not use LLMs for this type of activity	I have not use LLMs for this type of activity	I have not use LLMs for this type of activity	I have not use LLMs for this type of activity	Extremely Risky	Very Risky	Extremely Risky	Extremely Risky	Extremely Risky	Extremely Risky	Neutral	Neutral	Unacceptable	Unacceptable	Unacceptable	Unacceptable	Somewhat comfortable	Uncomfortable	Uncomfortable	Uncomfortable	Uncomfortable	Uncomfortable	Somewhat comfortable	Uncomfortable	Uncomfortable	Uncomfortable	Uncomfortable	Uncomfortable
2024-02-01 6:59:10	2024-02-01 7:09:58	100	647	TRUE	2024-02-01 7:09:59		Yes, to discover important topics or threads of research for literature review	Frequently	Yes, to rewrite text I've written to fix grammatical issues or awkward phrasings	Never	No, I don't use LLMs for directly writing text while I lead ideation	Frequently	Yes, to brainstorm research topics or questions to work on	Occasionally	No, I don't use LLMs for data generation	Never	No, I don't use LLMs for data cleaning, analysis, or reporting	Never		Extremely useful	Very useful	Slightly useful	Very useful	Very useful	Very useful	Moderately Risky	Moderately Risky	Moderately Risky	Slightly Risky	Moderately Risky	Moderately Risky	Acceptable	Acceptable	Somewhat Unacceptable	Somewhat Acceptable	Somewhat Acceptable	Acceptable	Comfortable	Somewhat uncomfortable	Somewhat comfortable	Somewhat comfortable	Somewhat comfortable	Comfortable	Somewhat comfortable	Somewhat uncomfortable	Somewhat uncomfortable	Somewhat comfortable	Somewhat comfortable	Comfortable
2023-11-28 9:36:04	2023-11-28 9:52:36	100	991	TRUE	2023-11-28 9:52:37		No, I don't use LLMs for information seeking or reading	Never	No, I don't use LLMs for editing support when I am writing	Very Rarely	No, I don't use LLMs for directly writing text while I lead ideation	Never	No, I don't use LLMs for ideation and framing	Never	No, I don't use LLMs for data generation	Never	No, I don't use LLMs for data cleaning, analysis, or reporting	Never		Slightly useful	Slightly useful	I have not use LLMs for this type of activity	I have not use LLMs for this type of activity	I have not use LLMs for this type of activity	I have not use LLMs for this type of activity	Unsure / Don't Know	Very Risky	Extremely Risky	Very Risky	Extremely Risky	Extremely Risky	Unacceptable	Unacceptable	Unacceptable	Somewhat Unacceptable	Unacceptable	Unacceptable	Neutral	Neutral	Neutral	Neutral	Neutral	Neutral	Neutral	Neutral	Neutral	Neutral	Neutral	Neutral
2024-01-25 21:46:49	2024-01-25 22:37:48	100	3058	TRUE	2024-01-25 22:37:49		Yes, to discover papers to read	Frequently	No, I don't use LLMs for editing support when I am writing	Never	No, I don't use LLMs for directly writing text while I lead ideation	Never	No, I don't use LLMs for ideation and framing	Never	No, I don't use LLMs for data generation	Never	No, I don't use LLMs for data cleaning, analysis, or reporting	Never		Very useful	Slightly useful	Not at all useful	Slightly useful	Not at all useful	Not at all useful	Very Risky	Moderately Risky	Slightly Risky	Not at all Risky	Very Risky	Very Risky	Acceptable	Acceptable	Somewhat Unacceptable	Acceptable	Neutral	Neutral	Comfortable	Comfortable	Uncomfortable	Comfortable	Comfortable	Comfortable	Comfortable	Comfortable	Uncomfortable	Comfortable	Neutral	Neutral
2024-01-25 23:07:23	2024-01-25 23:11:03	100	219	TRUE	2024-01-25 23:11:03		No, I don't use LLMs for information seeking or reading	Never	No, I don't use LLMs for editing support when I am writing	Never	No, I don't use LLMs for directly writing text while I lead ideation	Never	No, I don't use LLMs for ideation and framing	Never	No, I don't use LLMs for data generation	Never	No, I don't use LLMs for data cleaning, analysis, or reporting	Never		I have not use LLMs for this type of activity	I have not use LLMs for this type of activity	I have not use LLMs for this type of activity	I have not use LLMs for this type of activity	I have not use LLMs for this type of activity	I have not use LLMs for this type of activity	Unsure / Don't Know	Unsure / Don't Know	Unsure / Don't Know	Unsure / Don't Know	Unsure / Don't Know	Unsure / Don't Know	Unsure / Don't Know	Unsure / Don't Know	Unsure / Don't Know	Unsure / Don't Know	Unsure / Don't Know	Unsure / Don't Know	Unsure / Don't Know	Unsure / Don't Know	Unsure / Don't Know	Unsure / Don't Know	Unsure / Don't Know	Unsure / Don't Know	Unsure / Don't Know	Unsure / Don't Know	Unsure / Don't Know	Unsure / Don't Know	Unsure / Don't Know	Unsure / Don't Know
2023-11-27 23:24:09	2023-11-27 23:41:41	43	1052	FALSE	2023-12-04 23:41:42		Yes, to discover papers to read,Yes, to discover important topics or threads of research for literature review,Yes, to generate summaries or explanations of papers or technical terms in papers,Yes, to ask broad questions of the field such as current trends or important findings,Yes, other:	Frequently	Yes, to support paper formatting (e.g., LaTeX, formatting tables or formulas)	Never	No, I don't use LLMs for directly writing text while I lead ideation	Never	Yes, to get inspiration for methods or approaches to use for a given problem	Never	No, I don't use LLMs for data generation	Never	No, I don't use LLMs for data cleaning, analysis, or reporting	Occasionally
2023-11-29 11:28:26	2023-11-29 11:39:47	100	681	TRUE	2023-11-29 11:39:48		No, I don't use LLMs for information seeking or reading	Never	Yes, to look up synonyms when I'm writing papers,Yes, to rewrite text I've written to fix grammatical issues or awkward phrasings	Rarely	Yes, to shorten or summarize a long piece of text that I wrote,Yes, to draft paragraphs from ideas or bullet points,Yes, to rewrite my writing into a different style (e.g., more formal)	Rarely	No, I don't use LLMs for ideation and framing	Never	No, I don't use LLMs for data generation	Never	No, I don't use LLMs for data cleaning, analysis, or reporting	Never		Not at all useful	Very useful	Very useful	Not at all useful	Not at all useful	Not at all useful	Extremely Risky	Not at all Risky	Not at all Risky	Moderately Risky	Extremely Risky	Moderately Risky	Acceptable	Acceptable	Somewhat Acceptable	Somewhat Acceptable	Unacceptable	Unsure / Don't Know	Comfortable	Comfortable	Comfortable	Comfortable	Comfortable	Comfortable	Comfortable	Comfortable	Comfortable	Comfortable	Comfortable	Comfortable
2023-11-29 21:08:42	2023-11-29 21:15:17	100	394	TRUE	2023-11-29 21:15:18		Yes, to discover important topics or threads of research for literature review	Rarely	Yes, to support paper formatting (e.g., LaTeX, formatting tables or formulas)	Occasionally	No, I don't use LLMs for directly writing text while I lead ideation	Very Rarely	Yes, to brainstorm research topics or questions to work on	Very Rarely	Yes, to generate synthetic interviews and survey responses	Very Rarely	Yes, to clean and reformat datasets	Very Rarely		Moderately useful	Slightly useful	Moderately useful	Slightly useful	Moderately useful	Moderately useful	Very Risky	Moderately Risky	Very Risky	Slightly Risky	Slightly Risky	Moderately Risky	Somewhat Acceptable	Somewhat Acceptable	Somewhat Acceptable	Somewhat Acceptable	Somewhat Acceptable	Somewhat Acceptable	Somewhat comfortable	Comfortable	Somewhat comfortable	Comfortable	Somewhat comfortable	Somewhat comfortable	Somewhat comfortable	Somewhat uncomfortable	Neutral	Somewhat comfortable	Comfortable	Somewhat comfortable
2023-11-15 11:58:07	2023-11-15 12:08:31	100	624	TRUE	2023-11-15 12:08:32		Yes, to discover papers to read,Yes, to discover important topics or threads of research for literature review,Yes, to ask broad questions of the field such as current trends or important findings	Frequently	Yes, to rewrite text I've written to fix grammatical issues or awkward phrasings,Yes, to support paper formatting (e.g., LaTeX, formatting tables or formulas)	Frequently	Yes, to shorten or summarize a long piece of text that I wrote,Yes, to draft paragraphs from ideas or bullet points,Yes, to rewrite my writing into a different style (e.g., more formal)	Occasionally	Yes, to brainstorm research topics or questions to work on,Yes, to get inspiration for methods or approaches to use for a given problem	Frequently	Yes, to generate synthetic interviews and survey responses	Rarely	Yes, to clean and reformat datasets,Yes, to conduct statistical reporting of quantitative data,Yes, to conduct analysis and reporting of qualitative data (e.g., of participant interviews)	Frequently		Extremely useful	Very useful	Extremely useful	Extremely useful	Very useful	Very useful	Moderately Risky	Slightly Risky	Moderately Risky	Slightly Risky	Very Risky	Slightly Risky	Acceptable	Acceptable	Acceptable	Acceptable	Acceptable	Acceptable	Comfortable	Comfortable	Somewhat comfortable	Somewhat uncomfortable	Somewhat comfortable	Somewhat uncomfortable	Somewhat comfortable	Somewhat comfortable	Neutral	Somewhat uncomfortable	Somewhat comfortable	Somewhat comfortable
2024-01-25 6:51:14	2024-01-25 6:53:24	43	130	FALSE	2024-02-01 6:53:27		Yes, to discover papers to read,Yes, to discover important topics or threads of research for literature review,Yes, to ask broad questions of the field such as current trends or important findings	Occasionally	Yes, to look up synonyms when I'm writing papers,Yes, to rewrite text I've written to fix grammatical issues or awkward phrasings,Yes, to support paper formatting (e.g., LaTeX, formatting tables or formulas),Yes, other:	Frequently	Yes, to shorten or summarize a long piece of text that I wrote,Yes, to draft paragraphs from ideas or bullet points,Yes, to rewrite my writing into a different style (e.g., more formal)	Occasionally	Yes, to brainstorm research topics or questions to work on,Yes, to come up with new ways to frame a paper, including titles and abstracts,Yes, to get inspiration for methods or approaches to use for a given problem	Very Rarely	No, I don't use LLMs for data generation	Never	No, I don't use LLMs for data cleaning, analysis, or reporting	Never
2023-11-28 15:06:55	2023-11-28 15:10:58	57	242	FALSE	2023-12-05 15:11:01		Yes, to discover papers to read,Yes, to discover important topics or threads of research for literature review,Yes, to generate summaries or explanations of papers or technical terms in papers,Yes, to ask broad questions of the field such as current trends or important findings,Yes, other:	Very Frequently	Yes, to look up synonyms when I'm writing papers,Yes, to rewrite text I've written to fix grammatical issues or awkward phrasings,Yes, to support paper formatting (e.g., LaTeX, formatting tables or formulas)	Very Frequently	Yes, to shorten or summarize a long piece of text that I wrote,Yes, to draft paragraphs from ideas or bullet points,Yes, to rewrite my writing into a different style (e.g., more formal)	Very Frequently	Yes, to brainstorm research topics or questions to work on,Yes, to come up with new ways to frame a paper, including titles and abstracts,Yes, to get inspiration for methods or approaches to use for a given problem	Frequently	Yes, to generate synthetic interviews and survey responses,Yes, to automatically produce training labels given example data,Yes, to automatically produce both training examples and labels	Frequently	Yes, to clean and reformat datasets,Yes, to conduct statistical reporting of quantitative data,Yes, to conduct analysis and reporting of qualitative data (e.g., of participant interviews),Yes, to simulate human ratings of an existing dataset for evaluation (e.g., summarization quality)	Very Frequently		Extremely useful	Extremely useful	Extremely useful	Extremely useful	Extremely useful	Extremely useful	Extremely Risky	Extremely Risky	Extremely Risky	Extremely Risky	Extremely Risky	Extremely Risky		Acceptable	Acceptable	Acceptable	Acceptable	Acceptable	Comfortable	Comfortable	Comfortable	Comfortable	Comfortable	Comfortable	Comfortable	Comfortable	Comfortable	Comfortable	Comfortable	Comfortable
2023-11-16 1:40:53	2023-11-16 2:33:01	100	3128	TRUE	2023-11-16 2:33:02		Yes, to discover papers to read,Yes, to discover important topics or threads of research for literature review,Yes, to generate summaries or explanations of papers or technical terms in papers,Yes, to ask broad questions of the field such as current trends or important findings	Frequently	Yes, to look up synonyms when I'm writing papers,Yes, to rewrite text I've written to fix grammatical issues or awkward phrasings	Frequently	Yes, to shorten or summarize a long piece of text that I wrote,Yes, to rewrite my writing into a different style (e.g., more formal)	Frequently	Yes, to come up with new ways to frame a paper, including titles and abstracts	Rarely	No, I don't use LLMs for data generation	Rarely	No, I don't use LLMs for data cleaning, analysis, or reporting	Rarely		Extremely useful	Extremely useful	Very useful		I have not use LLMs for this type of activity	I have not use LLMs for this type of activity	Moderately Risky	Moderately Risky	Moderately Risky	Moderately Risky	Very Risky	Moderately Risky	Acceptable	Acceptable	Acceptable	Acceptable	Neutral	Acceptable	Neutral	Neutral	Neutral	Neutral	Somewhat uncomfortable	Comfortable	Comfortable	Comfortable	Comfortable	Comfortable	Neutral	Comfortable
2023-11-28 5:32:20	2023-11-28 5:52:25	57	1204	FALSE	2023-12-05 5:52:30		Yes, to discover papers to read,Yes, to discover important topics or threads of research for literature review,Yes, to generate summaries or explanations of papers or technical terms in papers,Yes, to ask broad questions of the field such as current trends or important findings	Very Frequently	Yes, to look up synonyms when I'm writing papers	Never	No, I don't use LLMs for directly writing text while I lead ideation	Never	No, I don't use LLMs for ideation and framing	Never	No, I don't use LLMs for data generation	Never	No, I don't use LLMs for data cleaning, analysis, or reporting	Very Frequently		Very useful	Very useful	Very useful	Moderately useful	Moderately useful	Very useful	Extremely Risky	Very Risky	Slightly Risky	Very Risky	Not at all Risky	Slightly Risky	Somewhat Unacceptable	Unacceptable	Somewhat Acceptable	Acceptable	Somewhat Unacceptable	Somewhat Unacceptable	Somewhat uncomfortable	Comfortable	Comfortable	Comfortable	Comfortable	Comfortable	Comfortable	Comfortable	Somewhat comfortable	Somewhat uncomfortable	Somewhat comfortable	Somewhat uncomfortable
2023-11-14 20:47:19	2023-11-15 0:57:09	100	14989	TRUE	2023-11-15 0:57:09		Yes, to discover important topics or threads of research for literature review,Yes, to ask broad questions of the field such as current trends or important findings	Occasionally	Yes, to rewrite text I've written to fix grammatical issues or awkward phrasings,Yes, to support paper formatting (e.g., LaTeX, formatting tables or formulas)	Occasionally	No, I don't use LLMs for directly writing text while I lead ideation	Never	Yes, to brainstorm research topics or questions to work on,Yes, to come up with new ways to frame a paper, including titles and abstracts	Rarely	No, I don't use LLMs for data generation	Never	No, I don't use LLMs for data cleaning, analysis, or reporting	Never		Very useful	Very useful	I have not use LLMs for this type of activity	Moderately useful	I have not use LLMs for this type of activity	I have not use LLMs for this type of activity	Moderately Risky	Moderately Risky	Extremely Risky	Moderately Risky	Moderately Risky	Moderately Risky	Somewhat Acceptable	Acceptable	Somewhat Unacceptable	Neutral	Somewhat Acceptable	Somewhat Acceptable	Comfortable	Comfortable	Somewhat uncomfortable	Neutral	Neutral	Neutral	Neutral	Comfortable	Somewhat uncomfortable	Neutral	Somewhat comfortable	Somewhat comfortable
2023-11-15 9:35:57	2023-11-15 9:52:56	100	1019	TRUE	2023-11-15 9:52:57		Yes, to discover papers to read,Yes, to discover important topics or threads of research for literature review,Yes, to ask broad questions of the field such as current trends or important findings	Occasionally	Yes, to rewrite text I've written to fix grammatical issues or awkward phrasings	Frequently	Yes, to shorten or summarize a long piece of text that I wrote,Yes, to draft paragraphs from ideas or bullet points,Yes, to rewrite my writing into a different style (e.g., more formal)	Frequently	Yes, to brainstorm research topics or questions to work on,Yes, to come up with new ways to frame a paper, including titles and abstracts	Frequently	No, I don't use LLMs for data generation	Never	No, I don't use LLMs for data cleaning, analysis, or reporting	Never		Moderately useful	Very useful	Very useful	Very useful	I have not use LLMs for this type of activity	Not at all useful	Moderately Risky	Moderately Risky	Moderately Risky	Very Risky	Extremely Risky	Extremely Risky	Acceptable	Acceptable	Acceptable	Acceptable	Neutral	Neutral	Somewhat comfortable	Comfortable	Comfortable	Somewhat comfortable	Unsure / Don't Know	Unsure / Don't Know	Neutral	Neutral	Neutral	Neutral	Unsure / Don't Know	Unsure / Don't Know
2024-01-26 3:15:25	2024-01-26 3:22:49	100	444	TRUE	2024-01-26 3:22:50		No, I don't use LLMs for information seeking or reading	Never	No, I don't use LLMs for editing support when I am writing	Never	No, I don't use LLMs for directly writing text while I lead ideation	Never	No, I don't use LLMs for ideation and framing	Never	No, I don't use LLMs for data generation	Never	No, I don't use LLMs for data cleaning, analysis, or reporting	Never		I have not use LLMs for this type of activity	I have not use LLMs for this type of activity	I have not use LLMs for this type of activity	I have not use LLMs for this type of activity	I have not use LLMs for this type of activity	I have not use LLMs for this type of activity	Unsure / Don't Know	Unsure / Don't Know	Unsure / Don't Know	Unsure / Don't Know	Unsure / Don't Know	Unsure / Don't Know	Unsure / Don't Know	Unsure / Don't Know	Unsure / Don't Know	Unsure / Don't Know	Unsure / Don't Know	Unsure / Don't Know	Unsure / Don't Know		Unsure / Don't Know	Unsure / Don't Know	Unsure / Don't Know	Unsure / Don't Know	Unsure / Don't Know	Unsure / Don't Know	Unsure / Don't Know	Unsure / Don't Know	Unsure / Don't Know	Unsure / Don't Know
2023-11-28 3:59:30	2023-11-28 4:09:11	57	580	FALSE	2023-12-05 4:09:12		No, I don't use LLMs for information seeking or reading	Never	No, I don't use LLMs for editing support when I am writing	Never	No, I don't use LLMs for directly writing text while I lead ideation	Never	No, I don't use LLMs for ideation and framing	Never	No, I don't use LLMs for data generation	Never	No, I don't use LLMs for data cleaning, analysis, or reporting	Never		I have not use LLMs for this type of activity		I have not use LLMs for this type of activity	I have not use LLMs for this type of activity	I have not use LLMs for this type of activity	I have not use LLMs for this type of activity	Unsure / Don't Know	Unsure / Don't Know	Unsure / Don't Know	Unsure / Don't Know	Unsure / Don't Know	Unsure / Don't Know	Acceptable	Acceptable	Acceptable	Acceptable	Acceptable	Acceptable	Comfortable	Comfortable	Comfortable	Comfortable	Comfortable	Comfortable		Comfortable	Comfortable	Comfortable	Comfortable	Comfortable
2023-11-28 4:06:17	2023-11-28 4:14:12	100	474	TRUE	2023-11-28 4:14:13		Yes, to discover important topics or threads of research for literature review	Occasionally	Yes, to look up synonyms when I'm writing papers	Occasionally	Yes, other:	Occasionally	Yes, other:	Occasionally	No, I don't use LLMs for data generation	Occasionally	No, I don't use LLMs for data cleaning, analysis, or reporting	Occasionally		Moderately useful	Slightly useful	Slightly useful	Slightly useful	Extremely useful	Slightly useful	Slightly Risky	Slightly Risky	Slightly Risky	Slightly Risky	Slightly Risky	Slightly Risky	Somewhat Unacceptable	Somewhat Unacceptable	Somewhat Unacceptable	Neutral	Somewhat Unacceptable	Somewhat Unacceptable	Neutral	Neutral	Neutral	Neutral	Neutral	Neutral	Neutral	Neutral	Neutral	Neutral	Neutral	Neutral
2024-01-25 22:35:34	2024-01-25 22:51:09	100	935	TRUE	2024-01-25 22:51:10		Yes, to generate summaries or explanations of papers or technical terms in papers	Occasionally	Yes, to look up synonyms when I'm writing papers,Yes, to rewrite text I've written to fix grammatical issues or awkward phrasings	Frequently	Yes, to shorten or summarize a long piece of text that I wrote,Yes, to rewrite my writing into a different style (e.g., more formal)	Very Rarely	No, I don't use LLMs for ideation and framing	Very Rarely	No, I don't use LLMs for data generation	Never	Yes, to clean and reformat datasets	Occasionally		Not at all useful	Very useful	Very useful	Not at all useful	I have not use LLMs for this type of activity	Moderately useful	Unsure / Don't Know	Unsure / Don't Know	Unsure / Don't Know	Unsure / Don't Know	Unsure / Don't Know	Unsure / Don't Know	Acceptable	Acceptable	Acceptable	Acceptable	Somewhat Acceptable	Acceptable	Comfortable	Comfortable	Comfortable	Comfortable	Unsure / Don't Know	Comfortable	Comfortable	Comfortable	Comfortable	Comfortable	Unsure / Don't Know	Comfortable
2023-11-28 13:39:47	2023-11-28 13:56:06	100	979	TRUE	2023-11-28 13:56:07		No, I don't use LLMs for information seeking or reading	Very Rarely	No, I don't use LLMs for editing support when I am writing	Never	No, I don't use LLMs for directly writing text while I lead ideation	Very Rarely	No, I don't use LLMs for ideation and framing	Never	No, I don't use LLMs for data generation	Never	No, I don't use LLMs for data cleaning, analysis, or reporting	Never		I have not use LLMs for this type of activity	I have not use LLMs for this type of activity	I have not use LLMs for this type of activity	I have not use LLMs for this type of activity	I have not use LLMs for this type of activity	I have not use LLMs for this type of activity	Moderately Risky	Unsure / Don't Know	Very Risky	Unsure / Don't Know	Extremely Risky	Unsure / Don't Know	Somewhat Acceptable	Neutral	Neutral	Neutral	Somewhat Unacceptable	Neutral	Comfortable	Comfortable	Comfortable	Comfortable	Comfortable	Comfortable	Comfortable	Comfortable	Comfortable	Comfortable	Comfortable	Comfortable
2024-01-25 5:27:06	2024-01-25 5:35:34	100	507	TRUE	2024-01-25 5:35:34		No, I don't use LLMs for information seeking or reading	Very Rarely	Yes, to look up synonyms when I'm writing papers,Yes, to rewrite text I've written to fix grammatical issues or awkward phrasings	Frequently	No, I don't use LLMs for directly writing text while I lead ideation	Never	No, I don't use LLMs for ideation and framing	Never	No, I don't use LLMs for data generation	Never	No, I don't use LLMs for data cleaning, analysis, or reporting	Never		Slightly useful	Extremely useful	Moderately useful	Slightly useful	I have not use LLMs for this type of activity	I have not use LLMs for this type of activity	Moderately Risky	Not at all Risky	Moderately Risky	Very Risky	Extremely Risky	Extremely Risky	Acceptable	Acceptable	Acceptable	Neutral	Somewhat Unacceptable	Somewhat Acceptable	Comfortable	Comfortable	Somewhat uncomfortable	Uncomfortable	Uncomfortable	Somewhat uncomfortable	Comfortable	Comfortable	Somewhat uncomfortable	Uncomfortable	Somewhat uncomfortable	Uncomfortable
2024-01-26 13:47:54	2024-01-26 14:01:11	100	797	TRUE	2024-01-26 14:01:12		Yes, to discover important topics or threads of research for literature review,Yes, to ask broad questions of the field such as current trends or important findings	Occasionally	No, I don't use LLMs for editing support when I am writing	Never	No, I don't use LLMs for directly writing text while I lead ideation	Never	No, I don't use LLMs for ideation and framing	Never	No, I don't use LLMs for data generation	Never	No, I don't use LLMs for data cleaning, analysis, or reporting	Never		Moderately useful	I have not use LLMs for this type of activity	I have not use LLMs for this type of activity	I have not use LLMs for this type of activity	I have not use LLMs for this type of activity	I have not use LLMs for this type of activity	Very Risky	Slightly Risky	Extremely Risky	Moderately Risky	Extremely Risky	Very Risky	Acceptable	Acceptable	Somewhat Unacceptable	Somewhat Acceptable	Unacceptable	Neutral	Neutral	Somewhat comfortable	Uncomfortable	Somewhat uncomfortable	Uncomfortable	Uncomfortable	Neutral	Unsure / Don't Know	Unsure / Don't Know	Unsure / Don't Know	Unsure / Don't Know	Unsure / Don't Know
2024-01-25 1:48:11	2024-01-25 1:52:40	43	268	FALSE	2024-02-01 1:52:44		Yes, to discover papers to read,Yes, to discover important topics or threads of research for literature review,Yes, to ask broad questions of the field such as current trends or important findings	Frequently	Yes, to rewrite text I've written to fix grammatical issues or awkward phrasings,Yes, to support paper formatting (e.g., LaTeX, formatting tables or formulas)	Occasionally	Yes, to draft paragraphs from ideas or bullet points,Yes, to rewrite my writing into a different style (e.g., more formal)	Never	Yes, to come up with new ways to frame a paper, including titles and abstracts	Frequently	Yes, to generate synthetic interviews and survey responses	Occasionally	Yes, to clean and reformat datasets,Yes, to conduct analysis and reporting of qualitative data (e.g., of participant interviews)	Occasionally
2024-01-25 20:38:55	2024-01-25 21:03:00	57	1444	FALSE	2024-02-01 21:03:06		Yes, to discover important topics or threads of research for literature review,Yes, to ask broad questions of the field such as current trends or important findings	Occasionally	Yes, to rewrite text I've written to fix grammatical issues or awkward phrasings	Occasionally	Yes, to rewrite my writing into a different style (e.g., more formal)	Occasionally	Yes, to get inspiration for methods or approaches to use for a given problem	Occasionally	No, I don't use LLMs for data generation	Never	No, I don't use LLMs for data cleaning, analysis, or reporting	Never		Moderately useful	Moderately useful	Moderately useful	Very useful	Slightly useful	Slightly useful	Moderately Risky	Moderately Risky	Unsure / Don't Know	Moderately Risky	Unsure / Don't Know	Unsure / Don't Know	Acceptable	Acceptable	Acceptable	Acceptable	Somewhat Unacceptable	Somewhat Acceptable	Somewhat uncomfortable	Somewhat uncomfortable	Uncomfortable	Somewhat uncomfortable	Uncomfortable	Somewhat uncomfortable	Comfortable	Comfortable	Comfortable	Comfortable	Uncomfortable	Somewhat uncomfortable
2023-11-15 11:30:56	2023-11-15 11:37:15	100	379	TRUE	2023-11-15 11:37:16		Yes, to discover papers to read,Yes, to discover important topics or threads of research for literature review,Yes, to generate summaries or explanations of papers or technical terms in papers,Yes, to ask broad questions of the field such as current trends or important findings	Very Frequently	Yes, to look up synonyms when I'm writing papers,Yes, to rewrite text I've written to fix grammatical issues or awkward phrasings,Yes, to support paper formatting (e.g., LaTeX, formatting tables or formulas)	Very Frequently	Yes, to shorten or summarize a long piece of text that I wrote	Rarely	Yes, to brainstorm research topics or questions to work on,Yes, to get inspiration for methods or approaches to use for a given problem	Frequently	No, I don't use LLMs for data generation	Never	No, I don't use LLMs for data cleaning, analysis, or reporting	Rarely		Extremely useful	Extremely useful	Extremely useful	Extremely useful	Moderately useful	Very useful	Moderately Risky	Moderately Risky	Very Risky	Very Risky	Very Risky	Very Risky	Acceptable	Somewhat Acceptable	Somewhat Unacceptable	Somewhat Acceptable	Somewhat Acceptable	Somewhat Acceptable	Somewhat comfortable	Comfortable	Neutral	Somewhat uncomfortable	Somewhat comfortable	Somewhat comfortable	Comfortable	Comfortable	Comfortable	Somewhat comfortable	Comfortable	Comfortable
2023-11-15 6:12:24	2023-11-15 6:18:59	100	394	TRUE	2023-11-15 6:19:00		Yes, to generate summaries or explanations of papers or technical terms in papers	Occasionally	No, I don't use LLMs for editing support when I am writing	Never	No, I don't use LLMs for directly writing text while I lead ideation	Never	Yes, to get inspiration for methods or approaches to use for a given problem	Occasionally	Yes, to automatically produce training labels given example data	Frequently	Yes, to simulate human ratings of an existing dataset for evaluation (e.g., summarization quality)	Occasionally		Slightly useful	Not at all useful	Not at all useful	Slightly useful	Very useful	Very useful	Moderately Risky	Very Risky	Very Risky	Moderately Risky	Slightly Risky	Slightly Risky	Neutral	Neutral	Neutral	Neutral	Neutral	Neutral	Neutral	Neutral	Neutral	Neutral	Neutral	Neutral	Neutral	Neutral	Neutral	Neutral	Neutral	Neutral
2023-11-15 11:19:35	2023-11-15 11:45:31	100	1555	TRUE	2023-11-15 11:45:31		No, I don't use LLMs for information seeking or reading	Never	No, I don't use LLMs for editing support when I am writing	Never	No, I don't use LLMs for directly writing text while I lead ideation	Never	No, I don't use LLMs for ideation and framing	Never	No, I don't use LLMs for data generation	Never	No, I don't use LLMs for data cleaning, analysis, or reporting	Never		I have not use LLMs for this type of activity	I have not use LLMs for this type of activity	I have not use LLMs for this type of activity	I have not use LLMs for this type of activity	I have not use LLMs for this type of activity	I have not use LLMs for this type of activity	Unsure / Don't Know	Unsure / Don't Know	Very Risky	Extremely Risky	Extremely Risky	Extremely Risky	Neutral	Neutral	Neutral	Neutral	Neutral	Neutral	Neutral	Neutral	Neutral	Neutral	Neutral	Neutral	Neutral		Neutral	Neutral	Neutral	Neutral
2024-01-25 12:50:09	2024-01-25 12:53:08	43	178	FALSE	2024-02-01 12:53:13		Yes, to ask broad questions of the field such as current trends or important findings	Very Rarely	Yes, to rewrite text I've written to fix grammatical issues or awkward phrasings	Occasionally	No, I don't use LLMs for directly writing text while I lead ideation	Never	Yes, to get inspiration for methods or approaches to use for a given problem	Occasionally	No, I don't use LLMs for data generation	Never	Yes, to clean and reformat datasets,Yes, to conduct statistical reporting of quantitative data	Occasionally
2023-11-16 6:20:25	2023-11-16 6:23:12	43	166	FALSE	2023-11-23 6:23:15		No, I don't use LLMs for information seeking or reading	Very Rarely	Yes, to look up synonyms when I'm writing papers,Yes, to rewrite text I've written to fix grammatical issues or awkward phrasings	Occasionally	No, I don't use LLMs for directly writing text while I lead ideation	Very Rarely	No, I don't use LLMs for ideation and framing	Very Rarely	No, I don't use LLMs for data generation	Very Rarely	Yes, to clean and reformat datasets	Occasionally
2023-11-15 16:20:08	2023-11-15 16:47:20	100	1631	TRUE	2023-11-15 16:47:21		Yes, to discover papers to read,Yes, to discover important topics or threads of research for literature review	Frequently	Yes, to rewrite text I've written to fix grammatical issues or awkward phrasings	Frequently	Yes, to shorten or summarize a long piece of text that I wrote,Yes, to rewrite my writing into a different style (e.g., more formal)	Frequently	Yes, to brainstorm research topics or questions to work on,Yes, to come up with new ways to frame a paper, including titles and abstracts	Frequently	Yes, to generate synthetic interviews and survey responses	Occasionally	Yes, to conduct analysis and reporting of qualitative data (e.g., of participant interviews),Yes, to simulate human ratings of an existing dataset for evaluation (e.g., summarization quality)	Occasionally		Very useful	Very useful	Very useful	Very useful	Very useful	Very useful	Moderately Risky	Moderately Risky	Moderately Risky	Slightly Risky	Moderately Risky	Moderately Risky	Somewhat Acceptable	Somewhat Acceptable	Somewhat Acceptable	Somewhat Acceptable	Somewhat Acceptable	Somewhat Acceptable	Comfortable	Comfortable	Comfortable	Comfortable	Somewhat comfortable	Neutral	Somewhat comfortable	Somewhat comfortable	Somewhat comfortable	Somewhat comfortable	Somewhat comfortable	Neutral
2023-11-28 12:33:16	2023-11-28 12:37:49	100	272	TRUE	2023-11-28 12:37:50		Yes, to discover papers to read,Yes, to discover important topics or threads of research for literature review,Yes, to generate summaries or explanations of papers or technical terms in papers,Yes, to ask broad questions of the field such as current trends or important findings	Frequently	Yes, to look up synonyms when I'm writing papers,Yes, to rewrite text I've written to fix grammatical issues or awkward phrasings,Yes, to support paper formatting (e.g., LaTeX, formatting tables or formulas)	Occasionally	Yes, to shorten or summarize a long piece of text that I wrote,Yes, to draft paragraphs from ideas or bullet points,Yes, to rewrite my writing into a different style (e.g., more formal)	Occasionally	Yes, to brainstorm research topics or questions to work on,Yes, to come up with new ways to frame a paper, including titles and abstracts,Yes, to get inspiration for methods or approaches to use for a given problem	Occasionally	Yes, to generate synthetic interviews and survey responses,Yes, to automatically produce training labels given example data,Yes, to automatically produce both training examples and labels	Occasionally	Yes, to clean and reformat datasets,Yes, to conduct statistical reporting of quantitative data,Yes, to conduct analysis and reporting of qualitative data (e.g., of participant interviews),Yes, to simulate human ratings of an existing dataset for evaluation (e.g., summarization quality)	Occasionally		Moderately useful	Moderately useful	Moderately useful	Moderately useful	Moderately useful	Moderately useful	Slightly Risky	Slightly Risky	Moderately Risky	Slightly Risky	Moderately Risky	Slightly Risky	Neutral	Neutral	Somewhat Acceptable	Somewhat Acceptable	Somewhat Acceptable	Somewhat Acceptable	Somewhat comfortable	Somewhat comfortable	Somewhat comfortable	Neutral	Neutral	Somewhat comfortable	Neutral	Somewhat comfortable	Neutral	Neutral	Somewhat comfortable	Neutral
2023-11-15 10:18:07	2023-11-15 10:31:46	100	818	TRUE	2023-11-15 10:31:47		No, I don't use LLMs for information seeking or reading	Never	Yes, to rewrite text I've written to fix grammatical issues or awkward phrasings	Occasionally	No, I don't use LLMs for directly writing text while I lead ideation	Never	No, I don't use LLMs for ideation and framing	Never	No, I don't use LLMs for data generation	Never	No, I don't use LLMs for data cleaning, analysis, or reporting	Never		I have not use LLMs for this type of activity	Very useful	I have not use LLMs for this type of activity	I have not use LLMs for this type of activity	I have not use LLMs for this type of activity	I have not use LLMs for this type of activity	Extremely Risky	Slightly Risky	Moderately Risky	Moderately Risky	Extremely Risky	Extremely Risky	Somewhat Acceptable	Somewhat Acceptable	Somewhat Acceptable	Somewhat Acceptable	Somewhat Unacceptable	Unacceptable	Uncomfortable	Somewhat comfortable	Somewhat uncomfortable	Uncomfortable	Uncomfortable	Uncomfortable	Somewhat uncomfortable	Somewhat comfortable	Uncomfortable	Somewhat uncomfortable	Uncomfortable	Uncomfortable
2023-11-29 6:29:21	2023-11-29 6:42:15	100	774	TRUE	2023-11-29 6:42:16		No, I don't use LLMs for information seeking or reading	Never	No, I don't use LLMs for editing support when I am writing	Never	No, I don't use LLMs for directly writing text while I lead ideation	Never	No, I don't use LLMs for ideation and framing	Never	No, I don't use LLMs for data generation	Never	No, I don't use LLMs for data cleaning, analysis, or reporting	Never		I have not use LLMs for this type of activity	I have not use LLMs for this type of activity	I have not use LLMs for this type of activity	I have not use LLMs for this type of activity	I have not use LLMs for this type of activity	I have not use LLMs for this type of activity	Unsure / Don't Know	Unsure / Don't Know	Unsure / Don't Know	Unsure / Don't Know	Unsure / Don't Know	Unsure / Don't Know	Unsure / Don't Know	Unsure / Don't Know	Unsure / Don't Know	Unsure / Don't Know	Unsure / Don't Know	Unsure / Don't Know	Unsure / Don't Know	Unsure / Don't Know	Unsure / Don't Know	Unsure / Don't Know	Unsure / Don't Know	Unsure / Don't Know	Unsure / Don't Know	Unsure / Don't Know	Unsure / Don't Know	Unsure / Don't Know	Unsure / Don't Know	Unsure / Don't Know
2024-01-25 8:01:21	2024-01-25 8:14:38	100	797	TRUE	2024-01-25 8:14:39		Yes, to discover papers to read,Yes, to discover important topics or threads of research for literature review	Occasionally	No, I don't use LLMs for editing support when I am writing	Never	No, I don't use LLMs for directly writing text while I lead ideation	Never	No, I don't use LLMs for ideation and framing	Never	Yes, other:	Very Rarely	No, I don't use LLMs for data cleaning, analysis, or reporting	Never		Very useful	Slightly useful	Slightly useful	Slightly useful	Very useful	Slightly useful	Very Risky	Extremely Risky	Extremely Risky	Extremely Risky	Very Risky	Extremely Risky	Acceptable	Neutral	Neutral	Neutral	Neutral	Acceptable	Comfortable	Unsure / Don't Know	Unsure / Don't Know	Unsure / Don't Know	Unsure / Don't Know	Unsure / Don't Know	Comfortable	Unsure / Don't Know	Unsure / Don't Know	Unsure / Don't Know	Unsure / Don't Know	Unsure / Don't Know
2024-01-25 13:43:35	2024-01-25 14:08:59	100	1524	TRUE	2024-01-25 14:09:00		No, I don't use LLMs for information seeking or reading	Never	Yes, to rewrite text I've written to fix grammatical issues or awkward phrasings	Never	No, I don't use LLMs for directly writing text while I lead ideation	Never	No, I don't use LLMs for ideation and framing	Never	No, I don't use LLMs for data generation	Never	Yes, other:	Occasionally		I have not use LLMs for this type of activity	Moderately useful	I have not use LLMs for this type of activity	I have not use LLMs for this type of activity	I have not use LLMs for this type of activity	Moderately useful	Extremely Risky	Not at all Risky	Moderately Risky	Moderately Risky	Unsure / Don't Know	Very Risky	Acceptable	Acceptable	Neutral	Neutral	Unsure / Don't Know	Acceptable	Comfortable	Comfortable	Comfortable	Comfortable	Comfortable	Comfortable	Comfortable	Comfortable	Comfortable	Comfortable	Comfortable	Comfortable
2024-01-26 9:50:30	2024-01-26 9:52:47	43	137	FALSE	2024-02-02 9:52:52		Yes, to discover important topics or threads of research for literature review	Occasionally	Yes, to look up synonyms when I'm writing papers,Yes, to support paper formatting (e.g., LaTeX, formatting tables or formulas)	Occasionally	Yes, to shorten or summarize a long piece of text that I wrote	Never	No, I don't use LLMs for ideation and framing	Never	No, I don't use LLMs for data generation	Never	No, I don't use LLMs for data cleaning, analysis, or reporting	Never
2024-01-25 3:48:59	2024-01-25 3:57:17	100	497	TRUE	2024-01-25 3:57:17		No, I don't use LLMs for information seeking or reading	Never	Yes, to look up synonyms when I'm writing papers,Yes, to rewrite text I've written to fix grammatical issues or awkward phrasings	Occasionally	Yes, to draft paragraphs from ideas or bullet points	Very Rarely	No, I don't use LLMs for ideation and framing	Never	No, I don't use LLMs for data generation	Never	No, I don't use LLMs for data cleaning, analysis, or reporting	Never		I have not use LLMs for this type of activity	Moderately useful	Moderately useful	I have not use LLMs for this type of activity	I have not use LLMs for this type of activity	I have not use LLMs for this type of activity	Extremely Risky	Slightly Risky	Very Risky	Extremely Risky	Extremely Risky	Extremely Risky	Acceptable	Acceptable	Acceptable	Neutral	Unacceptable	Unacceptable	Uncomfortable	Uncomfortable	Uncomfortable	Uncomfortable	Uncomfortable	Uncomfortable	Somewhat comfortable	Comfortable	Somewhat comfortable	Uncomfortable	Uncomfortable	Uncomfortable
2024-01-25 1:47:54	2024-01-25 2:04:58	57	1023	FALSE	2024-02-01 2:04:59		No, I don't use LLMs for information seeking or reading	Never	No, I don't use LLMs for editing support when I am writing	Never	No, I don't use LLMs for directly writing text while I lead ideation	Never	No, I don't use LLMs for ideation and framing	Never	No, I don't use LLMs for data generation	Never	No, I don't use LLMs for data cleaning, analysis, or reporting	Never		Not at all useful	Not at all useful	Not at all useful	Not at all useful	Not at all useful	Not at all useful	Not at all Risky	Not at all Risky	Not at all Risky	Not at all Risky	Not at all Risky	Not at all Risky	Unsure / Don't Know	Unsure / Don't Know	Unsure / Don't Know	Unsure / Don't Know	Unsure / Don't Know	Unsure / Don't Know	Unsure / Don't Know	Unsure / Don't Know	Unsure / Don't Know	Unsure / Don't Know	Unsure / Don't Know	Unsure / Don't Know	Unsure / Don't Know	Unsure / Don't Know	Unsure / Don't Know	Unsure / Don't Know	Unsure / Don't Know	Unsure / Don't Know
2024-01-26 1:58:50	2024-01-26 2:04:47	100	357	TRUE	2024-01-26 2:04:48		No, I don't use LLMs for information seeking or reading	Never	No, I don't use LLMs for editing support when I am writing	Never	No, I don't use LLMs for directly writing text while I lead ideation	Never	No, I don't use LLMs for ideation and framing	Never	No, I don't use LLMs for data generation	Never	No, I don't use LLMs for data cleaning, analysis, or reporting	Never		Not at all useful	Not at all useful	Not at all useful	Not at all useful	Not at all useful	Not at all useful	Extremely Risky	Very Risky	Extremely Risky	Extremely Risky	Moderately Risky	Extremely Risky	Neutral	Unacceptable	Unacceptable	Somewhat Unacceptable	Somewhat Acceptable	Neutral	Neutral	Neutral	Neutral	Neutral	Neutral	Neutral	Neutral	Neutral	Neutral	Neutral	Neutral	Neutral
2023-11-28 2:49:29	2023-11-28 3:43:37	71	3247	FALSE	2023-12-05 3:43:38		Yes, to discover papers to read,Yes, to discover important topics or threads of research for literature review	Occasionally	Yes, to look up synonyms when I'm writing papers,Yes, to rewrite text I've written to fix grammatical issues or awkward phrasings	Very Rarely	Yes, to rewrite my writing into a different style (e.g., more formal)	Rarely	Yes, to get inspiration for methods or approaches to use for a given problem	Rarely	No, I don't use LLMs for data generation	Never	Yes, to clean and reformat datasets	Never		Slightly useful	Moderately useful	Slightly useful	Slightly useful	Slightly useful	Slightly useful	Slightly Risky	Slightly Risky	Slightly Risky	Slightly Risky	Slightly Risky	Slightly Risky	Neutral	Neutral	Neutral	Neutral	Neutral	Neutral	Neutral	Neutral	Neutral	Neutral	Neutral	Neutral	Neutral	Neutral	Neutral	Neutral	Neutral	Neutral
2023-11-28 2:53:30	2023-11-28 3:01:17	43	466	FALSE	2023-12-05 3:01:20		Yes, to discover papers to read	Very Frequently	Yes, to rewrite text I've written to fix grammatical issues or awkward phrasings	Very Frequently	Yes, to shorten or summarize a long piece of text that I wrote,Yes, to draft paragraphs from ideas or bullet points,Yes, to rewrite my writing into a different style (e.g., more formal)	Rarely	No, I don't use LLMs for ideation and framing	Very Rarely	Yes, to automatically produce training labels given example data,Yes, to automatically produce both training examples and labels	Rarely	Yes, to clean and reformat datasets,Yes, to conduct statistical reporting of quantitative data,Yes, to conduct analysis and reporting of qualitative data (e.g., of participant interviews)	Very Frequently
2024-01-25 13:05:26	2024-01-25 13:16:07	100	641	TRUE	2024-01-25 13:16:08		Yes, to discover papers to read,Yes, to discover important topics or threads of research for literature review,Yes, to generate summaries or explanations of papers or technical terms in papers,Yes, to ask broad questions of the field such as current trends or important findings	Rarely	Yes, to look up synonyms when I'm writing papers,Yes, to rewrite text I've written to fix grammatical issues or awkward phrasings	Occasionally	Yes, to shorten or summarize a long piece of text that I wrote	Rarely	Yes, to brainstorm research topics or questions to work on,Yes, to come up with new ways to frame a paper, including titles and abstracts,Yes, to get inspiration for methods or approaches to use for a given problem	Rarely	Yes, to automatically produce both training examples and labels	Very Rarely	No, I don't use LLMs for data cleaning, analysis, or reporting	Never		Slightly useful	Slightly useful	Slightly useful	Slightly useful	Slightly useful	Not at all useful	Moderately Risky	Moderately Risky	Very Risky	Slightly Risky	Moderately Risky	Extremely Risky	Acceptable	Acceptable	Acceptable	Acceptable	Somewhat Acceptable	Acceptable	Comfortable	Comfortable	Somewhat comfortable	Somewhat comfortable	Comfortable	Comfortable	Comfortable	Comfortable	Somewhat comfortable	Somewhat comfortable	Comfortable	Comfortable
2023-11-30 4:51:32	2023-11-30 5:02:15	100	642	TRUE	2023-11-30 5:02:16		Yes, to discover papers to read,Yes, to discover important topics or threads of research for literature review,Yes, to generate summaries or explanations of papers or technical terms in papers,Yes, to ask broad questions of the field such as current trends or important findings	Occasionally	Yes, to rewrite text I've written to fix grammatical issues or awkward phrasings	Frequently	Yes, to draft paragraphs from ideas or bullet points	Occasionally	No, I don't use LLMs for ideation and framing	Never	No, I don't use LLMs for data generation	Never	No, I don't use LLMs for data cleaning, analysis, or reporting	Never		Extremely useful	Extremely useful	Very useful	Moderately useful	Slightly useful	Very useful	Slightly Risky	Not at all Risky	Very Risky	Very Risky	Moderately Risky	Moderately Risky	Acceptable	Acceptable	Somewhat Acceptable	Somewhat Acceptable	Neutral	Acceptable	Comfortable	Comfortable	Neutral	Neutral	Somewhat uncomfortable	Comfortable	Comfortable	Comfortable	Somewhat uncomfortable	Somewhat uncomfortable	Somewhat uncomfortable	Comfortable
2023-11-28 6:26:41	2023-11-28 6:38:48	100	727	TRUE	2023-11-28 6:38:49		No, I don't use LLMs for information seeking or reading	Never	Yes, to look up synonyms when I'm writing papers,Yes, to rewrite text I've written to fix grammatical issues or awkward phrasings,Yes, to support paper formatting (e.g., LaTeX, formatting tables or formulas)	Frequently	Yes, to shorten or summarize a long piece of text that I wrote,Yes, to draft paragraphs from ideas or bullet points,Yes, to rewrite my writing into a different style (e.g., more formal)	Rarely	No, I don't use LLMs for ideation and framing	Never	No, I don't use LLMs for data generation	Never	No, I don't use LLMs for data cleaning, analysis, or reporting	Never		I have not use LLMs for this type of activity	Extremely useful	Moderately useful	I have not use LLMs for this type of activity	I have not use LLMs for this type of activity	I have not use LLMs for this type of activity	Moderately Risky	Not at all Risky	Slightly Risky	Very Risky	Moderately Risky	Slightly Risky	Somewhat Acceptable	Acceptable	Acceptable	Somewhat Acceptable	Somewhat Acceptable	Somewhat Acceptable	Somewhat uncomfortable	Comfortable	Comfortable	Uncomfortable	Neutral	Somewhat comfortable	Unsure / Don't Know	Comfortable	Comfortable	Uncomfortable	Comfortable	Comfortable
2024-01-26 8:22:33	2024-01-26 8:36:22	100	829	TRUE	2024-01-26 8:36:23		No, I don't use LLMs for information seeking or reading	Never	No, I don't use LLMs for editing support when I am writing	Never	No, I don't use LLMs for directly writing text while I lead ideation	Never	No, I don't use LLMs for ideation and framing	Never	No, I don't use LLMs for data generation	Never	No, I don't use LLMs for data cleaning, analysis, or reporting	Never		I have not use LLMs for this type of activity	I have not use LLMs for this type of activity	I have not use LLMs for this type of activity	I have not use LLMs for this type of activity	I have not use LLMs for this type of activity	I have not use LLMs for this type of activity	Extremely Risky	Slightly Risky	Very Risky	Moderately Risky	Very Risky	Extremely Risky	Somewhat Acceptable	Acceptable	Unacceptable	Somewhat Acceptable	Unacceptable	Unacceptable	Comfortable	Comfortable	Comfortable	Comfortable	Comfortable	Comfortable	Comfortable	Comfortable	Comfortable	Comfortable	Comfortable	Comfortable
2024-01-25 14:35:45	2024-01-25 14:44:15	100	510	TRUE	2024-01-25 14:44:15		Yes, to ask broad questions of the field such as current trends or important findings	Very Rarely	No, I don't use LLMs for editing support when I am writing	Never	No, I don't use LLMs for directly writing text while I lead ideation	Never	No, I don't use LLMs for ideation and framing	Never	No, I don't use LLMs for data generation	Never	No, I don't use LLMs for data cleaning, analysis, or reporting	Never		I have not use LLMs for this type of activity	I have not use LLMs for this type of activity	I have not use LLMs for this type of activity	I have not use LLMs for this type of activity	I have not use LLMs for this type of activity	I have not use LLMs for this type of activity	Extremely Risky	Extremely Risky	Extremely Risky	Extremely Risky	Extremely Risky	Extremely Risky	Unacceptable	Unacceptable	Unacceptable	Unacceptable	Unacceptable	Unacceptable	Uncomfortable	Uncomfortable	Uncomfortable	Uncomfortable	Uncomfortable	Uncomfortable	Uncomfortable	Uncomfortable	Uncomfortable	Uncomfortable	Uncomfortable	Uncomfortable
2023-11-28 1:31:34	2023-11-28 1:40:14	100	520	TRUE	2023-11-28 1:40:15		Yes, to discover papers to read	Never	No, I don't use LLMs for editing support when I am writing	Never	No, I don't use LLMs for directly writing text while I lead ideation	Never	No, I don't use LLMs for ideation and framing	Never	No, I don't use LLMs for data generation	Never	No, I don't use LLMs for data cleaning, analysis, or reporting	Never		Very useful	Very useful	Very useful	Very useful	Very useful	Very useful	Extremely Risky	Extremely Risky	Extremely Risky	Extremely Risky	Extremely Risky	Extremely Risky	Neutral	Neutral	Neutral	Neutral	Neutral	Neutral	Uncomfortable	Uncomfortable	Uncomfortable	Uncomfortable	Uncomfortable	Uncomfortable	Uncomfortable	Uncomfortable	Uncomfortable	Uncomfortable	Uncomfortable	Uncomfortable
2024-01-25 12:53:14	2024-01-25 13:04:10	100	656	TRUE	2024-01-25 13:04:11		Yes, to generate summaries or explanations of papers or technical terms in papers	Frequently	Yes, to rewrite text I've written to fix grammatical issues or awkward phrasings	Frequently	Yes, to rewrite my writing into a different style (e.g., more formal)	Occasionally	Yes, to come up with new ways to frame a paper, including titles and abstracts	Occasionally	Yes, to generate synthetic interviews and survey responses,Yes, to automatically produce training labels given example data,Yes, to automatically produce both training examples and labels	Frequently	Yes, to simulate human ratings of an existing dataset for evaluation (e.g., summarization quality)	Occasionally		Moderately useful	Very useful	Moderately useful	Very useful	Very useful	Very useful	Slightly Risky	Slightly Risky	Moderately Risky	Not at all Risky	Slightly Risky	Slightly Risky	Neutral	Acceptable	Somewhat Acceptable	Somewhat Acceptable	Acceptable	Acceptable	Comfortable	Somewhat comfortable	Neutral	Comfortable	Comfortable	Comfortable	Somewhat comfortable	Neutral	Somewhat uncomfortable	Somewhat comfortable	Comfortable	Comfortable
2024-01-25 16:14:04	2024-01-25 16:21:29	100	444	TRUE	2024-01-25 16:21:29		No, I don't use LLMs for information seeking or reading	Never	Yes, to rewrite text I've written to fix grammatical issues or awkward phrasings,Yes, to support paper formatting (e.g., LaTeX, formatting tables or formulas)	Frequently	No, I don't use LLMs for directly writing text while I lead ideation	Never	No, I don't use LLMs for ideation and framing	Never	No, I don't use LLMs for data generation	Never	No, I don't use LLMs for data cleaning, analysis, or reporting	Never		Not at all useful	Very useful	Not at all useful	Slightly useful	Slightly useful	Slightly useful	Moderately Risky	Not at all Risky	Extremely Risky	Very Risky	Extremely Risky	Extremely Risky	Acceptable	Acceptable	Acceptable	Acceptable	Neutral	Neutral	Somewhat uncomfortable	Comfortable	Somewhat uncomfortable	Somewhat uncomfortable	Somewhat uncomfortable	Somewhat uncomfortable	Somewhat uncomfortable	Comfortable	Somewhat uncomfortable	Somewhat uncomfortable	Somewhat uncomfortable	Somewhat uncomfortable
2024-01-25 4:27:33	2024-01-25 4:33:03	100	330	TRUE	2024-01-25 4:33:04		Yes, to generate summaries or explanations of papers or technical terms in papers,Yes, to ask broad questions of the field such as current trends or important findings	Very Frequently	Yes, to look up synonyms when I'm writing papers,Yes, to rewrite text I've written to fix grammatical issues or awkward phrasings,No, I don't use LLMs for editing support when I am writing	Occasionally	Yes, to shorten or summarize a long piece of text that I wrote,Yes, to draft paragraphs from ideas or bullet points	Occasionally	Yes, to get inspiration for methods or approaches to use for a given problem	Frequently	No, I don't use LLMs for data generation	Never	No, I don't use LLMs for data cleaning, analysis, or reporting	Never		Slightly useful	Very useful	Very useful	Very useful	Not at all useful	Slightly useful	Very Risky	Not at all Risky	Very Risky	Not at all Risky		Very Risky	Acceptable	Acceptable	Acceptable	Acceptable	Acceptable	Acceptable	Comfortable	Comfortable	Comfortable	Comfortable	Comfortable	Comfortable	Comfortable	Comfortable	Comfortable	Comfortable	Comfortable	Comfortable
2024-01-25 13:30:46	2024-01-25 13:37:36	100	410	TRUE	2024-01-25 13:37:37		Yes, to generate summaries or explanations of papers or technical terms in papers,Yes, to ask broad questions of the field such as current trends or important findings	Occasionally	Yes, to look up synonyms when I'm writing papers,Yes, to rewrite text I've written to fix grammatical issues or awkward phrasings,Yes, to support paper formatting (e.g., LaTeX, formatting tables or formulas)	Frequently	Yes, to shorten or summarize a long piece of text that I wrote,Yes, to draft paragraphs from ideas or bullet points	Frequently	Yes, to brainstorm research topics or questions to work on,Yes, to come up with new ways to frame a paper, including titles and abstracts,Yes, to get inspiration for methods or approaches to use for a given problem	Occasionally	Yes, to automatically produce training labels given example data	Rarely	Yes, to conduct statistical reporting of quantitative data,Yes, to conduct analysis and reporting of qualitative data (e.g., of participant interviews),Yes, to simulate human ratings of an existing dataset for evaluation (e.g., summarization quality)	Frequently		Moderately useful	Moderately useful	Very useful	Extremely useful	Moderately useful	Very useful	Slightly Risky	Slightly Risky	Very Risky	Slightly Risky	Extremely Risky	Very Risky	Acceptable	Acceptable	Neutral	Acceptable	Acceptable	Acceptable	Comfortable	Comfortable	Comfortable	Comfortable	Comfortable	Comfortable	Somewhat comfortable	Somewhat comfortable	Somewhat uncomfortable	Somewhat comfortable	Neutral	Somewhat uncomfortable
2024-01-26 1:32:04	2024-01-26 1:39:00	100	416	TRUE	2024-01-26 1:39:01		Yes, to generate summaries or explanations of papers or technical terms in papers,Yes, to ask broad questions of the field such as current trends or important findings	Occasionally	Yes, to look up synonyms when I'm writing papers,Yes, to rewrite text I've written to fix grammatical issues or awkward phrasings,Yes, to support paper formatting (e.g., LaTeX, formatting tables or formulas)	Very Frequently	Yes, to shorten or summarize a long piece of text that I wrote,Yes, to draft paragraphs from ideas or bullet points	Rarely	Yes, to brainstorm research topics or questions to work on,Yes, to come up with new ways to frame a paper, including titles and abstracts	Rarely	No, I don't use LLMs for data generation	Never	No, I don't use LLMs for data cleaning, analysis, or reporting	Never		Moderately useful	Extremely useful	Moderately useful	Moderately useful	I have not use LLMs for this type of activity	I have not use LLMs for this type of activity	Moderately Risky	Not at all Risky	Slightly Risky	Moderately Risky	Extremely Risky	Extremely Risky	Acceptable	Acceptable	Somewhat Acceptable	Somewhat Acceptable	Unacceptable	Somewhat Unacceptable	Comfortable	Comfortable	Comfortable	Comfortable	Uncomfortable	Uncomfortable	Comfortable	Comfortable	Comfortable	Comfortable	Uncomfortable	Uncomfortable
2024-01-25 13:10:29	2024-01-25 13:17:44	100	435	TRUE	2024-01-25 13:17:45		Yes, to discover papers to read,Yes, to discover important topics or threads of research for literature review,Yes, to generate summaries or explanations of papers or technical terms in papers,Yes, to ask broad questions of the field such as current trends or important findings	Very Frequently	Yes, to look up synonyms when I'm writing papers,Yes, to rewrite text I've written to fix grammatical issues or awkward phrasings	Very Frequently	Yes, to shorten or summarize a long piece of text that I wrote,Yes, to draft paragraphs from ideas or bullet points,Yes, to rewrite my writing into a different style (e.g., more formal)	Very Frequently	Yes, to brainstorm research topics or questions to work on,Yes, to come up with new ways to frame a paper, including titles and abstracts,Yes, to get inspiration for methods or approaches to use for a given problem	Very Frequently	Yes, to generate synthetic interviews and survey responses,Yes, to automatically produce training labels given example data	Very Frequently	No, I don't use LLMs for data cleaning, analysis, or reporting	Rarely		Extremely useful	Extremely useful	Extremely useful	Extremely useful	Extremely useful	I have not use LLMs for this type of activity	Slightly Risky	Not at all Risky	Moderately Risky	Not at all Risky	Unsure / Don't Know	Unsure / Don't Know	Acceptable	Acceptable	Acceptable	Acceptable	Acceptable	Acceptable	Comfortable	Comfortable	Comfortable	Comfortable	Comfortable	Comfortable	Comfortable	Comfortable	Comfortable	Comfortable	Comfortable	Comfortable
2024-01-26 13:00:23	2024-01-26 13:10:01	100	577	TRUE	2024-01-26 13:10:02		No, I don't use LLMs for information seeking or reading	Occasionally	No, I don't use LLMs for editing support when I am writing	Never	No, I don't use LLMs for directly writing text while I lead ideation	Never	No, I don't use LLMs for ideation and framing	Never	No, I don't use LLMs for data generation	Never	No, I don't use LLMs for data cleaning, analysis, or reporting	Never		I have not use LLMs for this type of activity	I have not use LLMs for this type of activity	I have not use LLMs for this type of activity	I have not use LLMs for this type of activity	I have not use LLMs for this type of activity	I have not use LLMs for this type of activity	Unsure / Don't Know	Unsure / Don't Know	Unsure / Don't Know	Unsure / Don't Know	Unsure / Don't Know	Unsure / Don't Know	Acceptable	Acceptable	Acceptable	Acceptable	Unacceptable	Unacceptable	Comfortable	Comfortable	Comfortable	Comfortable	Uncomfortable	Uncomfortable	Comfortable	Comfortable	Comfortable	Comfortable	Unsure / Don't Know	Unsure / Don't Know
2024-01-25 9:50:33	2024-01-25 10:15:17	100	1483	TRUE	2024-01-25 10:15:18		Yes, to generate summaries or explanations of papers or technical terms in papers	Rarely	Yes, to rewrite text I've written to fix grammatical issues or awkward phrasings	Frequently	No, I don't use LLMs for directly writing text while I lead ideation	Never	Yes, to come up with new ways to frame a paper, including titles and abstracts	Occasionally	No, I don't use LLMs for data generation	Never	No, I don't use LLMs for data cleaning, analysis, or reporting	Never		Slightly useful	Very useful	I have not use LLMs for this type of activity	Moderately useful	I have not use LLMs for this type of activity	I have not use LLMs for this type of activity	Moderately Risky	Very Risky	Extremely Risky	Moderately Risky	Moderately Risky	Slightly Risky	Acceptable	Somewhat Acceptable	Somewhat Unacceptable	Acceptable	Neutral	Somewhat Acceptable	Somewhat uncomfortable	Neutral	Unsure / Don't Know	Somewhat uncomfortable	Somewhat comfortable	Neutral	Somewhat uncomfortable	Neutral	Unsure / Don't Know	Somewhat uncomfortable	Somewhat comfortable	Neutral
2024-01-25 16:22:23	2024-01-25 16:28:25	100	361	TRUE	2024-01-25 16:28:26		Yes, to discover papers to read,Yes, to discover important topics or threads of research for literature review,Yes, to ask broad questions of the field such as current trends or important findings	Frequently	Yes, to support paper formatting (e.g., LaTeX, formatting tables or formulas)	Never	No, I don't use LLMs for directly writing text while I lead ideation	Never	No, I don't use LLMs for ideation and framing	Never	Yes, to automatically produce both training examples and labels	Frequently	Yes, to clean and reformat datasets	Frequently		Very useful	Not at all useful	Not at all useful	Slightly useful	Extremely useful	Extremely useful	Not at all Risky	Not at all Risky	Not at all Risky	Not at all Risky	Slightly Risky	Slightly Risky	Neutral	Neutral	Neutral	Neutral	Acceptable	Acceptable	Comfortable	Unsure / Don't Know	Unsure / Don't Know	Comfortable	Comfortable	Comfortable	Comfortable	Comfortable	Unsure / Don't Know	Unsure / Don't Know	Comfortable	Comfortable
2024-01-25 10:43:39	2024-01-25 10:47:34	57	234	FALSE	2024-02-01 10:47:40		No, I don't use LLMs for information seeking or reading	Never	No, I don't use LLMs for editing support when I am writing	Never	No, I don't use LLMs for directly writing text while I lead ideation	Never	No, I don't use LLMs for ideation and framing	Never	No, I don't use LLMs for data generation	Never	No, I don't use LLMs for data cleaning, analysis, or reporting	Never		I have not use LLMs for this type of activity	I have not use LLMs for this type of activity	I have not use LLMs for this type of activity	I have not use LLMs for this type of activity	I have not use LLMs for this type of activity	I have not use LLMs for this type of activity	Unsure / Don't Know	Unsure / Don't Know	Unsure / Don't Know	Unsure / Don't Know	Unsure / Don't Know	Unsure / Don't Know	Unsure / Don't Know	Unsure / Don't Know	Unsure / Don't Know	Unsure / Don't Know	Unsure / Don't Know	Unsure / Don't Know	Unsure / Don't Know	Unsure / Don't Know	Unsure / Don't Know	Unsure / Don't Know	Unsure / Don't Know	Unsure / Don't Know	Unsure / Don't Know	Unsure / Don't Know	Unsure / Don't Know	Unsure / Don't Know	Unsure / Don't Know	Unsure / Don't Know
2024-01-25 22:51:58	2024-01-25 22:57:07	43	308	FALSE	2024-02-01 22:57:14		No, I don't use LLMs for information seeking or reading	Never	Yes, to look up synonyms when I'm writing papers,Yes, to rewrite text I've written to fix grammatical issues or awkward phrasings	Occasionally	No, I don't use LLMs for directly writing text while I lead ideation	Very Rarely	No, I don't use LLMs for ideation and framing	Never	No, I don't use LLMs for data generation	Very Rarely	No, I don't use LLMs for data cleaning, analysis, or reporting	Occasionally
2024-01-28 7:33:41	2024-01-28 7:55:50	100	1329	TRUE	2024-01-28 7:55:51		Yes, to discover papers to read,Yes, to discover important topics or threads of research for literature review,Yes, to generate summaries or explanations of papers or technical terms in papers,Yes, to ask broad questions of the field such as current trends or important findings	Very Frequently	Yes, to look up synonyms when I'm writing papers,Yes, to rewrite text I've written to fix grammatical issues or awkward phrasings	Very Frequently	No, I don't use LLMs for directly writing text while I lead ideation	Very Rarely	Yes, to brainstorm research topics or questions to work on,Yes, to come up with new ways to frame a paper, including titles and abstracts,Yes, to get inspiration for methods or approaches to use for a given problem	Very Frequently	Yes, to generate synthetic interviews and survey responses,Yes, to automatically produce training labels given example data,Yes, to automatically produce both training examples and labels	Very Frequently	Yes, to conduct analysis and reporting of qualitative data (e.g., of participant interviews),Yes, to simulate human ratings of an existing dataset for evaluation (e.g., summarization quality)	Occasionally		Moderately useful	Moderately useful	Slightly useful	Extremely useful	Moderately useful	Moderately useful	Moderately Risky	Moderately Risky	Very Risky	Slightly Risky	Slightly Risky	Slightly Risky	Acceptable	Acceptable	Somewhat Acceptable	Acceptable	Acceptable	Acceptable	Comfortable	Comfortable	Comfortable	Comfortable	Comfortable	Comfortable	Comfortable	Comfortable	Comfortable	Comfortable	Comfortable	Comfortable
2024-01-25 13:59:40	2024-01-25 14:11:25	97	704	FALSE	2024-02-01 14:15:23		No, I don't use LLMs for information seeking or reading	Never	No, I don't use LLMs for editing support when I am writing	Never	No, I don't use LLMs for directly writing text while I lead ideation	Never	No, I don't use LLMs for ideation and framing	Never	No, I don't use LLMs for data generation	Never	No, I don't use LLMs for data cleaning, analysis, or reporting	Never		I have not use LLMs for this type of activity	I have not use LLMs for this type of activity	I have not use LLMs for this type of activity	I have not use LLMs for this type of activity	I have not use LLMs for this type of activity	I have not use LLMs for this type of activity	Unsure / Don't Know	Unsure / Don't Know	Unsure / Don't Know	Unsure / Don't Know	Unsure / Don't Know	Unsure / Don't Know	Unsure / Don't Know	Unsure / Don't Know	Unacceptable	Unsure / Don't Know	Unsure / Don't Know	Unsure / Don't Know	Unsure / Don't Know	Unsure / Don't Know	Unsure / Don't Know	Unsure / Don't Know	Unsure / Don't Know	Unsure / Don't Know	Unsure / Don't Know	Unsure / Don't Know	Unsure / Don't Know	Unsure / Don't Know	Unsure / Don't Know	Comfortable
2024-01-25 9:48:36	2024-01-25 9:59:37	100	660	TRUE	2024-01-25 9:59:38		Yes, to discover papers to read	Rarely	Yes, to rewrite text I've written to fix grammatical issues or awkward phrasings	Occasionally	No, I don't use LLMs for directly writing text while I lead ideation	Never	No, I don't use LLMs for ideation and framing	Never	No, I don't use LLMs for data generation	Never	No, I don't use LLMs for data cleaning, analysis, or reporting	Never		Extremely useful	Very useful	Slightly useful	Not at all useful	Moderately useful	Not at all useful	Not at all Risky	Slightly Risky	Extremely Risky	Very Risky	Moderately Risky	Extremely Risky	Acceptable	Acceptable	Unacceptable	Somewhat Acceptable	Neutral	Somewhat Unacceptable	Comfortable	Comfortable	Comfortable	Comfortable	Comfortable	Comfortable	Comfortable	Comfortable	Comfortable	Comfortable	Comfortable	Comfortable
2024-01-25 4:10:12	2024-01-25 4:15:39	100	327	TRUE	2024-01-25 4:15:40		No, I don't use LLMs for information seeking or reading	Never	No, I don't use LLMs for editing support when I am writing	Never	No, I don't use LLMs for directly writing text while I lead ideation	Never	No, I don't use LLMs for ideation and framing	Never	No, I don't use LLMs for data generation	Never	No, I don't use LLMs for data cleaning, analysis, or reporting	Never		I have not use LLMs for this type of activity	I have not use LLMs for this type of activity	I have not use LLMs for this type of activity	I have not use LLMs for this type of activity	I have not use LLMs for this type of activity	I have not use LLMs for this type of activity	Unsure / Don't Know	Unsure / Don't Know	Unsure / Don't Know	Unsure / Don't Know	Unsure / Don't Know	Unsure / Don't Know	Unsure / Don't Know	Unsure / Don't Know	Unsure / Don't Know	Unsure / Don't Know	Unsure / Don't Know	Unsure / Don't Know	Unsure / Don't Know	Unsure / Don't Know	Unsure / Don't Know	Unsure / Don't Know	Unsure / Don't Know	Unsure / Don't Know	Unsure / Don't Know	Unsure / Don't Know	Unsure / Don't Know	Unsure / Don't Know	Unsure / Don't Know	Unsure / Don't Know
2024-01-28 10:10:03	2024-01-28 10:23:01	100	777	TRUE	2024-01-28 10:23:01		No, I don't use LLMs for information seeking or reading	Never	No, I don't use LLMs for editing support when I am writing	Never	No, I don't use LLMs for directly writing text while I lead ideation	Never	No, I don't use LLMs for ideation and framing	Never	No, I don't use LLMs for data generation	Never	No, I don't use LLMs for data cleaning, analysis, or reporting	Never		I have not use LLMs for this type of activity	I have not use LLMs for this type of activity	I have not use LLMs for this type of activity	I have not use LLMs for this type of activity	I have not use LLMs for this type of activity	I have not use LLMs for this type of activity	Extremely Risky	Extremely Risky	Extremely Risky	Extremely Risky	Extremely Risky	Extremely Risky	Unacceptable	Unacceptable	Unacceptable	Unacceptable	Unacceptable	Unacceptable	Comfortable	Comfortable	Comfortable	Comfortable	Comfortable	Comfortable	Comfortable	Comfortable	Comfortable	Comfortable	Comfortable	Comfortable
2024-04-15 23:26:19	2024-04-15 23:35:23	71	544	FALSE	2024-04-22 23:35:24		Yes, to discover papers to read,Yes, to discover important topics or threads of research for literature review,Yes, to generate summaries or explanations of papers or technical terms in papers,Yes, to ask broad questions of the field such as current trends or important findings	Occasionally	Yes, to look up synonyms when I'm writing papers,Yes, to rewrite text I've written to fix grammatical issues or awkward phrasings,Yes, to support paper formatting (e.g., LaTeX, formatting tables or formulas)	Frequently	No, I don't use LLMs for directly writing text while I lead ideation	Very Rarely	No, I don't use LLMs for ideation and framing	Never	No, I don't use LLMs for data generation	Never	No, I don't use LLMs for data cleaning, analysis, or reporting	Never		Very useful	Very useful	Moderately useful	I have not use LLMs for this type of activity	I have not use LLMs for this type of activity	I have not use LLMs for this type of activity	Slightly Risky	Moderately Risky	Very Risky	Unsure / Don't Know	Extremely Risky	Unsure / Don't Know	Acceptable	Acceptable	Somewhat Acceptable	Somewhat Acceptable	Unsure / Don't Know	Unsure / Don't Know	Comfortable	Comfortable	Neutral	Unsure / Don't Know	Unsure / Don't Know	Unsure / Don't Know	Comfortable	Comfortable	Unsure / Don't Know	Unsure / Don't Know	Unsure / Don't Know	Unsure / Don't Know
2023-11-16 18:55:38	2023-11-16 19:05:57	100	618	TRUE	2023-11-16 19:05:58		Yes, to generate summaries or explanations of papers or technical terms in papers	Rarely	No, I don't use LLMs for editing support when I am writing	Never	No, I don't use LLMs for directly writing text while I lead ideation	Never	Yes, to brainstorm research topics or questions to work on	Very Rarely	Yes, other:	Frequently	No, I don't use LLMs for data cleaning, analysis, or reporting	Never		Moderately useful	I have not use LLMs for this type of activity	I have not use LLMs for this type of activity	Moderately useful	Very useful	I have not use LLMs for this type of activity	Moderately Risky	Moderately Risky	Extremely Risky	Slightly Risky	Moderately Risky	Very Risky	Acceptable	Neutral	Somewhat Unacceptable	Neutral	Unsure / Don't Know	Acceptable	Comfortable	Somewhat comfortable	Uncomfortable	Somewhat comfortable	Comfortable	Somewhat comfortable	Comfortable	Comfortable	Somewhat uncomfortable	Somewhat comfortable	Comfortable	Comfortable
2023-11-15 9:17:10	2023-11-15 9:29:14	100	724	TRUE	2023-11-15 9:29:15		No, I don't use LLMs for information seeking or reading	Very Rarely	Yes, to look up synonyms when I'm writing papers,Yes, to rewrite text I've written to fix grammatical issues or awkward phrasings,Yes, other:	Occasionally	Yes, to rewrite my writing into a different style (e.g., more formal)	Rarely	No, I don't use LLMs for ideation and framing	Never	Yes, to automatically produce training labels given example data,Yes, to automatically produce both training examples and labels	Rarely	No, I don't use LLMs for data cleaning, analysis, or reporting	Never		Very useful	Very useful	Slightly useful	Not at all useful	Very useful	Moderately useful	Moderately Risky	Not at all Risky	Moderately Risky	Slightly Risky	Moderately Risky	Slightly Risky	Somewhat Acceptable	Acceptable	Somewhat Unacceptable	Somewhat Acceptable	Acceptable	Acceptable	Comfortable	Comfortable	Comfortable	Comfortable	Comfortable	Comfortable	Comfortable	Comfortable	Comfortable	Comfortable	Comfortable	Comfortable
2024-01-25 13:18:39	2024-01-25 13:27:20	100	520	TRUE	2024-01-25 13:27:21		No, I don't use LLMs for information seeking or reading	Rarely	Yes, to rewrite text I've written to fix grammatical issues or awkward phrasings	Very Frequently	Yes, to rewrite my writing into a different style (e.g., more formal)	Frequently	No, I don't use LLMs for ideation and framing	Never	Yes, to automatically produce training labels given example data	Frequently	No, I don't use LLMs for data cleaning, analysis, or reporting	Never		Moderately useful	Extremely useful	Moderately useful	Not at all useful	Very useful	Moderately useful	Extremely Risky	Not at all Risky	Slightly Risky	Extremely Risky	Moderately Risky	Moderately Risky	Somewhat Acceptable	Acceptable	Acceptable	Neutral	Somewhat Acceptable	Somewhat Acceptable	Neutral	Comfortable	Somewhat comfortable	Neutral	Comfortable	Comfortable	Comfortable	Comfortable	Comfortable	Somewhat uncomfortable	Comfortable	Comfortable
2023-11-28 5:38:59	2023-11-28 5:47:36	100	517	TRUE	2023-11-28 5:47:37		No, I don't use LLMs for information seeking or reading	Very Rarely	No, I don't use LLMs for editing support when I am writing	Very Rarely	No, I don't use LLMs for directly writing text while I lead ideation	Very Rarely	Yes, to get inspiration for methods or approaches to use for a given problem	Rarely	Yes, to automatically produce both training examples and labels	Very Rarely	No, I don't use LLMs for data cleaning, analysis, or reporting	Very Rarely		I have not use LLMs for this type of activity	Slightly useful	Slightly useful	Moderately useful	Slightly useful	Moderately useful	Moderately Risky	Moderately Risky	Very Risky	Moderately Risky	Very Risky	Moderately Risky	Somewhat Unacceptable	Somewhat Unacceptable	Somewhat Unacceptable	Somewhat Unacceptable	Somewhat Unacceptable	Somewhat Unacceptable	Neutral	Somewhat uncomfortable	Neutral	Somewhat uncomfortable	Neutral	Somewhat uncomfortable	Somewhat uncomfortable	Neutral	Somewhat uncomfortable	Neutral	Somewhat comfortable	Somewhat uncomfortable
2024-01-25 11:29:09	2024-01-25 11:40:21	100	672	TRUE	2024-01-25 11:40:22		No, I don't use LLMs for information seeking or reading	Never	Yes, to rewrite text I've written to fix grammatical issues or awkward phrasings	Never	No, I don't use LLMs for directly writing text while I lead ideation	Never	No, I don't use LLMs for ideation and framing	Never	No, I don't use LLMs for data generation	Never	No, I don't use LLMs for data cleaning, analysis, or reporting	Never		I have not use LLMs for this type of activity	I have not use LLMs for this type of activity	I have not use LLMs for this type of activity	I have not use LLMs for this type of activity	I have not use LLMs for this type of activity	I have not use LLMs for this type of activity	Unsure / Don't Know	Unsure / Don't Know	Unsure / Don't Know	Unsure / Don't Know	Unsure / Don't Know	Unsure / Don't Know	Acceptable	Acceptable	Somewhat Unacceptable	Neutral	Somewhat Unacceptable	Unsure / Don't Know	Neutral	Neutral	Uncomfortable	Somewhat uncomfortable	Comfortable	Comfortable	Unsure / Don't Know	Neutral	Somewhat uncomfortable	Neutral	Comfortable	Comfortable
2023-11-27 17:41:06	2023-11-27 18:03:00	100	1313	TRUE	2023-11-27 18:03:01		Yes, to discover papers to read	Occasionally	Yes, to look up synonyms when I'm writing papers	Rarely	No, I don't use LLMs for directly writing text while I lead ideation	Never	No, I don't use LLMs for ideation and framing	Very Rarely	No, I don't use LLMs for data generation	Never	No, I don't use LLMs for data cleaning, analysis, or reporting	Never		Moderately useful	Slightly useful	Not at all useful	Not at all useful	Not at all useful	Not at all useful	Extremely Risky	Slightly Risky	Extremely Risky	Moderately Risky	Slightly Risky	Very Risky	Somewhat Acceptable	Neutral	Unacceptable	Somewhat Unacceptable	Neutral		Somewhat uncomfortable	Somewhat comfortable	Uncomfortable	Somewhat comfortable	Somewhat comfortable	Neutral	Neutral	Somewhat comfortable		Uncomfortable	Somewhat comfortable	Somewhat uncomfortable
2024-01-25 15:20:36	2024-01-25 16:57:47	57	5831	FALSE	2024-02-01 16:57:54		Yes, to ask broad questions of the field such as current trends or important findings	Rarely	Yes, to rewrite text I've written to fix grammatical issues or awkward phrasings,Yes, to support paper formatting (e.g., LaTeX, formatting tables or formulas)	Occasionally	No, I don't use LLMs for directly writing text while I lead ideation	Very Rarely	No, I don't use LLMs for ideation and framing	Never	Yes, to automatically produce training labels given example data	Occasionally	Yes, other:	Rarely		Moderately useful	Moderately useful	Not at all useful	I have not use LLMs for this type of activity	Moderately useful	Moderately useful	Unsure / Don't Know	Slightly Risky	Slightly Risky	Not at all Risky	Slightly Risky	Moderately Risky	Acceptable	Acceptable	Neutral	Somewhat Acceptable	Acceptable	Somewhat Acceptable	Somewhat comfortable	Somewhat comfortable	Somewhat uncomfortable	Uncomfortable	Comfortable	Somewhat comfortable
2024-01-25 13:54:03	2024-01-25 14:02:00	100	476	TRUE	2024-01-25 14:02:01		No, I don't use LLMs for information seeking or reading	Very Rarely	Yes, to rewrite text I've written to fix grammatical issues or awkward phrasings	Occasionally	No, I don't use LLMs for directly writing text while I lead ideation	Never	No, I don't use LLMs for ideation and framing	Never	No, I don't use LLMs for data generation	Never	No, I don't use LLMs for data cleaning, analysis, or reporting	Never		I have not use LLMs for this type of activity	Moderately useful	I have not use LLMs for this type of activity	I have not use LLMs for this type of activity	I have not use LLMs for this type of activity	I have not use LLMs for this type of activity	Moderately Risky	Slightly Risky	Extremely Risky	Slightly Risky	Extremely Risky	Slightly Risky	Neutral	Neutral	Neutral	Neutral	Neutral	Neutral	Neutral	Neutral	Neutral	Neutral	Neutral	Neutral	Neutral	Neutral	Uncomfortable	Uncomfortable	Neutral	Neutral
2023-11-28 22:40:53	2023-11-28 22:49:43	100	529	TRUE	2023-11-28 22:49:44		No, I don't use LLMs for information seeking or reading	Never	No, I don't use LLMs for editing support when I am writing	Never	No, I don't use LLMs for directly writing text while I lead ideation	Never	No, I don't use LLMs for ideation and framing	Never	No, I don't use LLMs for data generation	Never	No, I don't use LLMs for data cleaning, analysis, or reporting	Never		I have not use LLMs for this type of activity	I have not use LLMs for this type of activity	I have not use LLMs for this type of activity	I have not use LLMs for this type of activity	I have not use LLMs for this type of activity	I have not use LLMs for this type of activity	Unsure / Don't Know	Unsure / Don't Know	Unsure / Don't Know	Unsure / Don't Know	Unsure / Don't Know	Unsure / Don't Know	Acceptable	Acceptable	Acceptable	Acceptable	Acceptable	Acceptable	Comfortable	Comfortable	Comfortable	Comfortable	Comfortable	Comfortable	Comfortable	Comfortable	Comfortable	Comfortable	Comfortable	Comfortable
2024-01-25 10:05:13	2024-01-25 10:15:11	100	598	TRUE	2024-01-25 10:15:11		Yes, to discover papers to read,Yes, other:	Very Rarely	Yes, other:	Rarely	No, I don't use LLMs for directly writing text while I lead ideation	Never	No, I don't use LLMs for ideation and framing	Never	Yes, other:	Rarely	No, I don't use LLMs for data cleaning, analysis, or reporting	Never		Very useful	Slightly useful	I have not use LLMs for this type of activity	I have not use LLMs for this type of activity	Slightly useful	I have not use LLMs for this type of activity	Moderately Risky	Slightly Risky	Unsure / Don't Know	Unsure / Don't Know	Slightly Risky	Unsure / Don't Know	Acceptable	Neutral	Somewhat Unacceptable	Neutral	Neutral	Somewhat Acceptable	Comfortable	Comfortable	Unsure / Don't Know	Unsure / Don't Know	Neutral	Neutral	Comfortable	Comfortable	Uncomfortable	Uncomfortable	Neutral	Neutral
2023-11-27 19:44:19	2023-11-27 19:55:15	100	655	TRUE	2023-11-27 19:55:16		No, I don't use LLMs for information seeking or reading	Rarely	Yes, to rewrite text I've written to fix grammatical issues or awkward phrasings	Occasionally	No, I don't use LLMs for directly writing text while I lead ideation	Never	No, I don't use LLMs for ideation and framing	Never	No, I don't use LLMs for data generation	Never	No, I don't use LLMs for data cleaning, analysis, or reporting	Never		I have not use LLMs for this type of activity	Extremely useful	I have not use LLMs for this type of activity	I have not use LLMs for this type of activity	I have not use LLMs for this type of activity	I have not use LLMs for this type of activity	Unsure / Don't Know	Slightly Risky	Unsure / Don't Know	Unsure / Don't Know	Unsure / Don't Know	Unsure / Don't Know	Unsure / Don't Know	Somewhat Acceptable	Unsure / Don't Know	Unsure / Don't Know	Unsure / Don't Know	Unsure / Don't Know	Comfortable	Comfortable	Unsure / Don't Know	Unsure / Don't Know	Unsure / Don't Know	Unsure / Don't Know	Unsure / Don't Know	Comfortable	Unsure / Don't Know	Unsure / Don't Know	Unsure / Don't Know	Unsure / Don't Know
2024-01-25 12:53:14	2024-01-25 13:11:42	100	1107	TRUE	2024-01-25 13:11:43		Yes, to discover papers to read	Occasionally	No, I don't use LLMs for editing support when I am writing	Never	No, I don't use LLMs for directly writing text while I lead ideation	Very Rarely	No, I don't use LLMs for ideation and framing	Never	Yes, other:	Never	No, I don't use LLMs for data cleaning, analysis, or reporting	Never		Slightly useful	Not at all useful	Not at all useful	Not at all useful	Not at all useful	Not at all useful	Not at all Risky	Unsure / Don't Know	Unsure / Don't Know	Unsure / Don't Know	Unsure / Don't Know	Unsure / Don't Know	Acceptable	Acceptable	Somewhat Acceptable	Acceptable	Somewhat Unacceptable	Neutral	Comfortable	Comfortable	Comfortable	Comfortable	Comfortable	Comfortable	Comfortable	Comfortable	Comfortable	Comfortable	Comfortable	Comfortable
2024-01-25 13:23:58	2024-01-25 13:38:19	100	861	TRUE	2024-01-25 13:38:20		Yes, to discover papers to read,Yes, to generate summaries or explanations of papers or technical terms in papers,Yes, other:	Very Frequently	Yes, to rewrite text I've written to fix grammatical issues or awkward phrasings,Yes, to support paper formatting (e.g., LaTeX, formatting tables or formulas)	Occasionally	Yes, to shorten or summarize a long piece of text that I wrote,Yes, to draft paragraphs from ideas or bullet points,Yes, to rewrite my writing into a different style (e.g., more formal)	Very Frequently	No, I don't use LLMs for ideation and framing	Never	Yes, to automatically produce training labels given example data,Yes, to automatically produce both training examples and labels	Rarely	Yes, to clean and reformat datasets	Rarely		Very useful	Very useful	Extremely useful	Not at all useful	Moderately useful	Slightly useful	Very Risky	Slightly Risky	Extremely Risky	Extremely Risky	Moderately Risky	Extremely Risky	Acceptable	Acceptable	Acceptable	Somewhat Unacceptable	Acceptable	Acceptable	Comfortable	Comfortable	Comfortable	Uncomfortable	Comfortable	Uncomfortable	Comfortable	Comfortable	Uncomfortable	Uncomfortable	Comfortable	Uncomfortable
2023-11-29 1:21:19	2023-11-29 1:44:28	57	1389	FALSE	2023-12-06 1:44:30		Yes, to discover papers to read,Yes, to discover important topics or threads of research for literature review,Yes, to generate summaries or explanations of papers or technical terms in papers	Occasionally	Yes, to rewrite text I've written to fix grammatical issues or awkward phrasings,Yes, to support paper formatting (e.g., LaTeX, formatting tables or formulas)	Occasionally	Yes, to shorten or summarize a long piece of text that I wrote,Yes, to draft paragraphs from ideas or bullet points	Rarely	Yes, to brainstorm research topics or questions to work on,Yes, to come up with new ways to frame a paper, including titles and abstracts	Occasionally	Yes, to automatically produce training labels given example data,Yes, to automatically produce both training examples and labels	Occasionally	Yes, to conduct statistical reporting of quantitative data,Yes, to conduct analysis and reporting of qualitative data (e.g., of participant interviews)	Occasionally		Extremely useful	Extremely useful	I have not use LLMs for this type of activity	Extremely useful	Extremely useful	Extremely useful
2023-11-28 23:59:07	2023-11-29 0:27:12	100	1684	TRUE	2023-11-29 0:27:13		No, I don't use LLMs for information seeking or reading	Never	No, I don't use LLMs for editing support when I am writing	Never	No, I don't use LLMs for directly writing text while I lead ideation	Never	No, I don't use LLMs for ideation and framing	Never	No, I don't use LLMs for data generation	Never	No, I don't use LLMs for data cleaning, analysis, or reporting	Never		I have not use LLMs for this type of activity	I have not use LLMs for this type of activity	I have not use LLMs for this type of activity	I have not use LLMs for this type of activity	I have not use LLMs for this type of activity	I have not use LLMs for this type of activity	Extremely Risky	Extremely Risky	Extremely Risky	Extremely Risky	Extremely Risky	Extremely Risky	Unacceptable	Unacceptable	Unacceptable	Unacceptable	Unacceptable	Unacceptable	Uncomfortable	Uncomfortable	Uncomfortable	Uncomfortable	Uncomfortable	Uncomfortable	Uncomfortable	Uncomfortable	Uncomfortable	Uncomfortable	Uncomfortable	Uncomfortable
2023-11-28 18:02:05	2023-11-28 18:19:46	100	1061	TRUE	2023-11-28 18:19:47		No, I don't use LLMs for information seeking or reading	Never	No, I don't use LLMs for editing support when I am writing	Rarely	No, I don't use LLMs for directly writing text while I lead ideation	Rarely	No, I don't use LLMs for ideation and framing	Very Rarely	No, I don't use LLMs for data generation	Never	No, I don't use LLMs for data cleaning, analysis, or reporting	Never		Moderately useful	Slightly useful	Not at all useful	I have not use LLMs for this type of activity	I have not use LLMs for this type of activity	I have not use LLMs for this type of activity	Unsure / Don't Know	Extremely Risky	Extremely Risky	Unsure / Don't Know	Unsure / Don't Know	Unsure / Don't Know	Unacceptable	Somewhat Unacceptable	Unacceptable	Unacceptable	Unacceptable	Unacceptable	Comfortable	Neutral	Unsure / Don't Know	Somewhat uncomfortable	Uncomfortable	Uncomfortable	Uncomfortable	Uncomfortable	Uncomfortable	Uncomfortable	Uncomfortable	Uncomfortable
2023-11-28 16:31:01	2023-11-28 16:39:20	100	499	TRUE	2023-11-28 16:39:21		Yes, to ask broad questions of the field such as current trends or important findings	Frequently	No, I don't use LLMs for editing support when I am writing	Rarely	No, I don't use LLMs for directly writing text while I lead ideation	Occasionally	Yes, to brainstorm research topics or questions to work on	Rarely	No, I don't use LLMs for data generation	Never	No, I don't use LLMs for data cleaning, analysis, or reporting	Never		Very useful	Moderately useful	Very useful	Moderately useful	I have not use LLMs for this type of activity	I have not use LLMs for this type of activity	Moderately Risky	Moderately Risky	Moderately Risky	Moderately Risky	Unsure / Don't Know	Unsure / Don't Know	Neutral	Neutral	Neutral	Neutral	Unsure / Don't Know	Unsure / Don't Know	Somewhat comfortable	Somewhat comfortable	Somewhat comfortable	Somewhat comfortable	Somewhat comfortable	Somewhat comfortable	Comfortable	Comfortable	Comfortable	Comfortable	Comfortable	Comfortable
2024-01-25 13:23:09	2024-01-25 13:28:47	57	338	FALSE	2024-02-01 13:28:49		Yes, to generate summaries or explanations of papers or technical terms in papers	Rarely	Yes, to support paper formatting (e.g., LaTeX, formatting tables or formulas)	Rarely	No, I don't use LLMs for directly writing text while I lead ideation	Never	No, I don't use LLMs for ideation and framing	Never	No, I don't use LLMs for data generation	Never	No, I don't use LLMs for data cleaning, analysis, or reporting	Never		Moderately useful	Moderately useful	Not at all useful	Not at all useful	I have not use LLMs for this type of activity	Not at all useful	Moderately Risky	Moderately Risky	Extremely Risky	Extremely Risky	Extremely Risky	Extremely Risky	Acceptable	Acceptable	Unacceptable	Somewhat Unacceptable	Neutral	Unacceptable	Comfortable	Comfortable	Unsure / Don't Know	Unsure / Don't Know	Unsure / Don't Know	Unsure / Don't Know	Comfortable	Comfortable	Comfortable	Comfortable	Comfortable	Comfortable
2024-01-25 10:28:07	2024-01-25 10:38:16	100	608	TRUE	2024-01-25 10:38:17		No, I don't use LLMs for information seeking or reading	Never	No, I don't use LLMs for editing support when I am writing	Never	No, I don't use LLMs for directly writing text while I lead ideation	Never	No, I don't use LLMs for ideation and framing	Never	No, I don't use LLMs for data generation	Never	No, I don't use LLMs for data cleaning, analysis, or reporting	Never		Not at all useful	Not at all useful	Not at all useful	Not at all useful	Not at all useful	Not at all useful	Extremely Risky	Very Risky	Extremely Risky	Very Risky	Extremely Risky	Extremely Risky	Unacceptable	Unacceptable	Unacceptable	Unacceptable	Unacceptable	Unacceptable	Comfortable	Comfortable	Comfortable	Comfortable	Comfortable	Comfortable	Comfortable	Comfortable	Comfortable	Comfortable	Comfortable	Comfortable
2024-01-31 8:34:38	2024-01-31 8:37:05	43	146	FALSE	2024-02-07 8:37:08		No, I don't use LLMs for information seeking or reading	Rarely	Yes, to look up synonyms when I'm writing papers,Yes, to support paper formatting (e.g., LaTeX, formatting tables or formulas)	Rarely	No, I don't use LLMs for directly writing text while I lead ideation	Rarely	No, I don't use LLMs for ideation and framing	Rarely	No, I don't use LLMs for data generation	Rarely	No, I don't use LLMs for data cleaning, analysis, or reporting	Never
2024-01-25 11:41:48	2024-01-25 11:45:02	43	194	FALSE	2024-02-01 11:45:04		Yes, to discover papers to read	Occasionally	Yes, to look up synonyms when I'm writing papers	Very Rarely	Yes, to shorten or summarize a long piece of text that I wrote	Very Rarely	Yes, to come up with new ways to frame a paper, including titles and abstracts	Very Rarely	Yes, to automatically produce training labels given example data	Very Rarely	Yes, to conduct statistical reporting of quantitative data	Very Rarely
2024-01-25 10:15:58	2024-01-25 10:23:37	100	458	TRUE	2024-01-25 10:23:38		Yes, to ask broad questions of the field such as current trends or important findings	Frequently	Yes, to rewrite text I've written to fix grammatical issues or awkward phrasings	Occasionally	Yes, to rewrite my writing into a different style (e.g., more formal)	Frequently	No, I don't use LLMs for ideation and framing	Never	No, I don't use LLMs for data generation	Never	No, I don't use LLMs for data cleaning, analysis, or reporting	Never		Moderately useful	Very useful	Slightly useful	Not at all useful	Not at all useful	Not at all useful	Moderately Risky	Slightly Risky	Slightly Risky	Very Risky	Extremely Risky	Moderately Risky	Acceptable	Acceptable	Acceptable	Somewhat Unacceptable	Neutral	Acceptable	Comfortable	Comfortable	Comfortable	Somewhat uncomfortable	Somewhat uncomfortable	Comfortable	Comfortable	Comfortable	Comfortable	Uncomfortable	Uncomfortable	Comfortable
2023-11-28 6:15:49	2023-11-28 7:50:16	100	5667	TRUE	2023-11-28 7:50:17		Yes, to discover papers to read	Rarely	No, I don't use LLMs for editing support when I am writing	Never	No, I don't use LLMs for directly writing text while I lead ideation	Never	Yes, to brainstorm research topics or questions to work on	Rarely	Yes, other:	Never	Yes, other:	Rarely		Moderately useful	Moderately useful	Moderately useful	Moderately useful	Moderately useful	Moderately useful	Unsure / Don't Know	Unsure / Don't Know	Unsure / Don't Know	Unsure / Don't Know	Unsure / Don't Know	Unsure / Don't Know	Unsure / Don't Know	Unsure / Don't Know	Unsure / Don't Know	Unsure / Don't Know	Unsure / Don't Know	Unsure / Don't Know	Comfortable	Comfortable	Comfortable	Comfortable	Comfortable	Comfortable	Neutral	Neutral	Neutral	Neutral	Neutral	Neutral
2024-01-26 0:41:28	2024-01-26 0:50:58	100	570	TRUE	2024-01-26 0:50:59		No, I don't use LLMs for information seeking or reading	Never	Yes, to look up synonyms when I'm writing papers,Yes, to rewrite text I've written to fix grammatical issues or awkward phrasings,Yes, to support paper formatting (e.g., LaTeX, formatting tables or formulas)	Occasionally	No, I don't use LLMs for directly writing text while I lead ideation	Never	No, I don't use LLMs for ideation and framing	Never	No, I don't use LLMs for data generation	Never	No, I don't use LLMs for data cleaning, analysis, or reporting	Never		Slightly useful	Extremely useful	Slightly useful	Slightly useful	Slightly useful	Slightly useful	Very Risky	Not at all Risky	Extremely Risky	Moderately Risky	Very Risky	Very Risky	Neutral	Acceptable	Unacceptable	Neutral	Somewhat Unacceptable	Neutral	Neutral	Comfortable	Uncomfortable	Somewhat comfortable	Neutral	Somewhat comfortable	Neutral	Comfortable	Uncomfortable	Somewhat comfortable	Neutral	Somewhat comfortable
2023-11-28 17:50:54	2023-11-28 18:15:19	100	1464	TRUE	2023-11-28 18:15:20		Yes, to discover important topics or threads of research for literature review,Yes, to ask broad questions of the field such as current trends or important findings	Occasionally	No, I don't use LLMs for editing support when I am writing	Rarely	No, I don't use LLMs for directly writing text while I lead ideation	Rarely	Yes, to come up with new ways to frame a paper, including titles and abstracts	Very Rarely	No, I don't use LLMs for data generation	Never	No, I don't use LLMs for data cleaning, analysis, or reporting	Never		Moderately useful	Not at all useful	Slightly useful	Slightly useful	Not at all useful		Extremely Risky	Extremely Risky	Extremely Risky	Very Risky	Extremely Risky	Very Risky	Somewhat Unacceptable	Somewhat Unacceptable	Somewhat Unacceptable	Unacceptable	Unacceptable	Somewhat Unacceptable	Somewhat uncomfortable		Somewhat uncomfortable	Somewhat uncomfortable	Uncomfortable	Somewhat uncomfortable	Neutral	Neutral		Neutral	Somewhat comfortable	Neutral
2023-11-15 4:59:18	2023-11-15 5:16:41	100	1043	TRUE	2023-11-15 5:16:41		Yes, to discover papers to read,Yes, to discover important topics or threads of research for literature review	Occasionally	Yes, to rewrite text I've written to fix grammatical issues or awkward phrasings	Rarely	No, I don't use LLMs for directly writing text while I lead ideation	Rarely	No, I don't use LLMs for ideation and framing	Very Rarely	No, I don't use LLMs for data generation	Never	No, I don't use LLMs for data cleaning, analysis, or reporting	Never		Very useful	Very useful	Slightly useful	Not at all useful	Not at all useful	Not at all useful	Not at all Risky	Moderately Risky	Very Risky	Extremely Risky	Extremely Risky	Extremely Risky	Acceptable	Acceptable	Somewhat Unacceptable	Unacceptable	Unacceptable	Neutral	Comfortable	Comfortable	Uncomfortable	Uncomfortable	Uncomfortable	Neutral	Neutral	Neutral	Uncomfortable	Uncomfortable	Uncomfortable	Uncomfortable
2024-01-28 4:06:19	2024-01-28 4:27:12	100	1253	TRUE	2024-01-28 4:27:14		Yes, other:	Very Frequently	Yes, other:	Never	Yes, other:	Very Frequently	No, I don't use LLMs for ideation and framing	Never	Yes, other:	Very Frequently	Yes, other:	Very Frequently		Extremely useful	I have not use LLMs for this type of activity	Extremely useful	I have not use LLMs for this type of activity	I have not use LLMs for this type of activity	Slightly useful	Slightly Risky	Slightly Risky	Unsure / Don't Know	Unsure / Don't Know	Unsure / Don't Know	Slightly Risky	Acceptable	Acceptable	Somewhat Acceptable	Neutral	Acceptable	Acceptable	Comfortable	Comfortable	Comfortable	Comfortable	Comfortable	Comfortable	Comfortable	Comfortable	Comfortable	Comfortable	Comfortable	Comfortable
2023-11-14 20:42:11	2023-11-14 20:55:02	100	770	TRUE	2023-11-14 20:55:03		No, I don't use LLMs for information seeking or reading	Very Rarely	No, I don't use LLMs for editing support when I am writing	Never	No, I don't use LLMs for directly writing text while I lead ideation	Never	No, I don't use LLMs for ideation and framing	Never	No, I don't use LLMs for data generation	Never	No, I don't use LLMs for data cleaning, analysis, or reporting	Never		Moderately useful	I have not use LLMs for this type of activity	I have not use LLMs for this type of activity	I have not use LLMs for this type of activity	I have not use LLMs for this type of activity	I have not use LLMs for this type of activity	Unsure / Don't Know	Unsure / Don't Know	Unsure / Don't Know	Unsure / Don't Know	Unsure / Don't Know	Unsure / Don't Know	Acceptable	Acceptable	Acceptable	Acceptable	Acceptable	Acceptable	Unsure / Don't Know	Unsure / Don't Know	Unsure / Don't Know	Unsure / Don't Know	Unsure / Don't Know	Unsure / Don't Know	Unsure / Don't Know	Unsure / Don't Know	Unsure / Don't Know	Unsure / Don't Know	Unsure / Don't Know	Unsure / Don't Know
2023-11-15 9:16:31	2023-11-15 10:07:19	100	3048	TRUE	2023-11-15 10:07:20		Yes, to discover papers to read,Yes, to generate summaries or explanations of papers or technical terms in papers,Yes, to ask broad questions of the field such as current trends or important findings	Very Frequently	Yes, to look up synonyms when I'm writing papers,Yes, to rewrite text I've written to fix grammatical issues or awkward phrasings	Occasionally	Yes, to rewrite my writing into a different style (e.g., more formal)	Never	Yes, to brainstorm research topics or questions to work on	Very Rarely	No, I don't use LLMs for data generation	Very Rarely	No, I don't use LLMs for data cleaning, analysis, or reporting	Never		Very useful	Very useful	I have not use LLMs for this type of activity	Slightly useful	I have not use LLMs for this type of activity	I have not use LLMs for this type of activity	Moderately Risky	Moderately Risky		Very Risky	Extremely Risky	Unsure / Don't Know	Somewhat Acceptable		Unacceptable		Unacceptable	Unsure / Don't Know	Comfortable	Comfortable	Comfortable	Somewhat comfortable		Comfortable	Comfortable	Comfortable	Comfortable	Comfortable	Comfortable	Comfortable
2023-11-28 20:30:59	2023-11-28 20:33:49	43	170	FALSE	2023-12-05 20:33:51		Yes, to discover papers to read,Yes, to discover important topics or threads of research for literature review,Yes, to generate summaries or explanations of papers or technical terms in papers	Very Frequently	Yes, to look up synonyms when I'm writing papers,Yes, to rewrite text I've written to fix grammatical issues or awkward phrasings,Yes, to support paper formatting (e.g., LaTeX, formatting tables or formulas)	Very Frequently	Yes, to shorten or summarize a long piece of text that I wrote,Yes, to draft paragraphs from ideas or bullet points,Yes, to rewrite my writing into a different style (e.g., more formal)	Occasionally	Yes, to brainstorm research topics or questions to work on,Yes, to get inspiration for methods or approaches to use for a given problem	Frequently	Yes, to automatically produce training labels given example data,Yes, to automatically produce both training examples and labels	Occasionally	Yes, to clean and reformat datasets,Yes, to conduct statistical reporting of quantitative data,Yes, to conduct analysis and reporting of qualitative data (e.g., of participant interviews)	Occasionally
2023-11-29 21:10:55	2023-11-29 21:30:56	100	1201	TRUE	2023-11-29 21:30:57		Yes, to discover papers to read,Yes, to discover important topics or threads of research for literature review	Frequently	No, I don't use LLMs for editing support when I am writing	Never	No, I don't use LLMs for directly writing text while I lead ideation	Never	No, I don't use LLMs for ideation and framing	Never	No, I don't use LLMs for data generation	Never	No, I don't use LLMs for data cleaning, analysis, or reporting	Never		Very useful	Not at all useful	Not at all useful	Slightly useful	Not at all useful	Not at all useful	Moderately Risky	Extremely Risky	Extremely Risky	Extremely Risky	Extremely Risky	Extremely Risky	Acceptable	Somewhat Unacceptable	Unacceptable	Somewhat Unacceptable	Unacceptable	Unacceptable	Comfortable	Unsure / Don't Know	Unsure / Don't Know	Unsure / Don't Know	Unsure / Don't Know	Unsure / Don't Know	Comfortable	Unsure / Don't Know	Unsure / Don't Know	Unsure / Don't Know	Unsure / Don't Know	Unsure / Don't Know
2024-01-25 4:48:40	2024-01-25 4:55:33	100	413	TRUE	2024-01-25 4:55:34		Yes, to discover papers to read	Frequently	No, I don't use LLMs for editing support when I am writing	Never	Yes, to shorten or summarize a long piece of text that I wrote,Yes, to draft paragraphs from ideas or bullet points	Very Rarely	No, I don't use LLMs for ideation and framing	Never	No, I don't use LLMs for data generation	Never	No, I don't use LLMs for data cleaning, analysis, or reporting	Never		Extremely useful	I have not use LLMs for this type of activity	Moderately useful	I have not use LLMs for this type of activity	I have not use LLMs for this type of activity	I have not use LLMs for this type of activity	Not at all Risky	Unsure / Don't Know	Very Risky	Unsure / Don't Know	Unsure / Don't Know	Unsure / Don't Know	Acceptable	Somewhat Acceptable	Somewhat Unacceptable	Unacceptable	Unacceptable	Acceptable	Comfortable	Unsure / Don't Know	Uncomfortable	Uncomfortable	Uncomfortable	Somewhat comfortable	Comfortable	Unsure / Don't Know	Uncomfortable	Unsure / Don't Know	Unsure / Don't Know	Somewhat comfortable
2024-01-25 17:36:58	2024-01-25 17:40:30	57	211	FALSE	2024-02-01 17:40:31		Yes, to discover papers to read,Yes, to discover important topics or threads of research for literature review,Yes, to generate summaries or explanations of papers or technical terms in papers,Yes, to ask broad questions of the field such as current trends or important findings	Frequently	Yes, to support paper formatting (e.g., LaTeX, formatting tables or formulas)	Occasionally	Yes, to draft paragraphs from ideas or bullet points	Occasionally	Yes, to come up with new ways to frame a paper, including titles and abstracts	Frequently	Yes, to automatically produce training labels given example data	Rarely	Yes, to conduct analysis and reporting of qualitative data (e.g., of participant interviews)	Occasionally		Very useful	Very useful	Moderately useful	Very useful	Extremely useful	Slightly useful	Very Risky	Slightly Risky	Slightly Risky	Slightly Risky	Not at all Risky	Not at all Risky	Unacceptable	Neutral	Neutral	Somewhat Acceptable	Somewhat Acceptable	Somewhat Acceptable	Somewhat uncomfortable	Somewhat comfortable	Uncomfortable	Somewhat uncomfortable	Neutral	Somewhat comfortable	Somewhat comfortable	Somewhat comfortable	Neutral	Somewhat comfortable	Somewhat comfortable	Somewhat comfortable
2023-12-04 18:16:26	2023-12-04 18:35:48	100	1161	TRUE	2023-12-04 18:35:49		No, I don't use LLMs for information seeking or reading	Never	No, I don't use LLMs for editing support when I am writing	Never	No, I don't use LLMs for directly writing text while I lead ideation	Never	No, I don't use LLMs for ideation and framing	Never	No, I don't use LLMs for data generation	Never	No, I don't use LLMs for data cleaning, analysis, or reporting	Never		I have not use LLMs for this type of activity	I have not use LLMs for this type of activity	I have not use LLMs for this type of activity	I have not use LLMs for this type of activity	I have not use LLMs for this type of activity	I have not use LLMs for this type of activity	Slightly Risky	Slightly Risky	Very Risky	Slightly Risky	Moderately Risky	Moderately Risky	Somewhat Acceptable	Somewhat Acceptable	Somewhat Unacceptable	Somewhat Acceptable	Somewhat Unacceptable	Somewhat Unacceptable	Unsure / Don't Know	Unsure / Don't Know	Unsure / Don't Know	Unsure / Don't Know	Unsure / Don't Know	Unsure / Don't Know	Unsure / Don't Know	Unsure / Don't Know	Unsure / Don't Know	Unsure / Don't Know	Unsure / Don't Know	Unsure / Don't Know
2023-11-15 10:24:00	2023-11-15 10:35:54	100	713	TRUE	2023-11-15 10:35:55		Yes, to discover important topics or threads of research for literature review,Yes, to generate summaries or explanations of papers or technical terms in papers	Occasionally	Yes, to look up synonyms when I'm writing papers,Yes, to rewrite text I've written to fix grammatical issues or awkward phrasings	Occasionally	Yes, to shorten or summarize a long piece of text that I wrote	Very Rarely	Yes, to get inspiration for methods or approaches to use for a given problem	Occasionally	Yes, to generate synthetic interviews and survey responses	Occasionally	Yes, to conduct analysis and reporting of qualitative data (e.g., of participant interviews)	Occasionally		Extremely useful	Moderately useful	Slightly useful	Very useful	Very useful	Very useful		Very Risky	Very Risky	Slightly Risky	Moderately Risky	Slightly Risky	Acceptable	Acceptable	Acceptable	Acceptable	Acceptable	Acceptable	Somewhat comfortable	Uncomfortable	Uncomfortable	Somewhat comfortable	Somewhat uncomfortable	Somewhat uncomfortable	Somewhat uncomfortable	Somewhat uncomfortable	Comfortable	Somewhat uncomfortable	Somewhat uncomfortable	Somewhat comfortable
2023-11-15 7:28:34	2023-11-15 7:42:29	100	834	TRUE	2023-11-15 7:42:30		Yes, to discover papers to read,Yes, to discover important topics or threads of research for literature review,Yes, to generate summaries or explanations of papers or technical terms in papers,Yes, to ask broad questions of the field such as current trends or important findings	Frequently	Yes, to rewrite text I've written to fix grammatical issues or awkward phrasings	Frequently	Yes, to shorten or summarize a long piece of text that I wrote,Yes, to draft paragraphs from ideas or bullet points,Yes, to rewrite my writing into a different style (e.g., more formal)	Frequently	No, I don't use LLMs for ideation and framing	Never	No, I don't use LLMs for data generation	Never	No, I don't use LLMs for data cleaning, analysis, or reporting	Never		Extremely useful	Extremely useful	Very useful	Slightly useful	I have not use LLMs for this type of activity	I have not use LLMs for this type of activity	Not at all Risky	Slightly Risky	Slightly Risky	Extremely Risky	Unsure / Don't Know	Unsure / Don't Know		Acceptable	Acceptable	Acceptable	Acceptable	Acceptable	Comfortable	Comfortable	Comfortable	Comfortable	Comfortable	Comfortable	Comfortable	Comfortable	Comfortable	Comfortable	Comfortable	Comfortable
2023-11-28 4:13:03	2023-11-28 4:43:28	43	1824	FALSE	2023-12-05 4:44:01		Yes, to discover important topics or threads of research for literature review	Occasionally	Yes, to look up synonyms when I'm writing papers	Frequently	Yes, to shorten or summarize a long piece of text that I wrote	Occasionally	Yes, to brainstorm research topics or questions to work on	Occasionally	Yes, to automatically produce training labels given example data	Frequently	Yes, to clean and reformat datasets	Occasionally
2023-11-28 8:48:12	2023-11-28 8:50:35	43	143	FALSE	2023-12-05 8:50:37		Yes, to discover papers to read,Yes, to discover important topics or threads of research for literature review	Occasionally	No, I don't use LLMs for editing support when I am writing	Never	No, I don't use LLMs for directly writing text while I lead ideation	Never	No, I don't use LLMs for ideation and framing	Never	No, I don't use LLMs for data generation	Never	No, I don't use LLMs for data cleaning, analysis, or reporting	Never
2023-11-16 8:14:28	2023-11-16 8:19:56	57	328	FALSE	2023-11-23 8:19:57		Yes, to discover papers to read,Yes, to discover important topics or threads of research for literature review,Yes, to generate summaries or explanations of papers or technical terms in papers,Yes, to ask broad questions of the field such as current trends or important findings	Very Frequently	No, I don't use LLMs for editing support when I am writing	Never	No, I don't use LLMs for directly writing text while I lead ideation	Never	Yes, to brainstorm research topics or questions to work on	Occasionally	No, I don't use LLMs for data generation	Never	No, I don't use LLMs for data cleaning, analysis, or reporting	Never		Extremely useful	I have not use LLMs for this type of activity	I have not use LLMs for this type of activity	Very useful	I have not use LLMs for this type of activity	I have not use LLMs for this type of activity	Moderately Risky	Unsure / Don't Know	Unsure / Don't Know	Moderately Risky	Unsure / Don't Know	Unsure / Don't Know	Acceptable	Acceptable	Acceptable	Acceptable	Acceptable	Acceptable	Somewhat uncomfortable	Somewhat uncomfortable	Somewhat uncomfortable	Somewhat uncomfortable	Somewhat uncomfortable	Somewhat uncomfortable	Somewhat uncomfortable	Somewhat uncomfortable	Somewhat uncomfortable	Somewhat uncomfortable	Somewhat uncomfortable	Somewhat uncomfortable
2024-01-26 7:31:41	2024-01-26 7:51:34	100	1193	TRUE	2024-01-26 7:51:35		No, I don't use LLMs for information seeking or reading	Very Rarely	No, I don't use LLMs for editing support when I am writing	Very Rarely	No, I don't use LLMs for directly writing text while I lead ideation	Never	No, I don't use LLMs for ideation and framing	Never	No, I don't use LLMs for data generation	Never	No, I don't use LLMs for data cleaning, analysis, or reporting	Never		I have not use LLMs for this type of activity	I have not use LLMs for this type of activity	I have not use LLMs for this type of activity	I have not use LLMs for this type of activity	I have not use LLMs for this type of activity	I have not use LLMs for this type of activity	Unsure / Don't Know	Unsure / Don't Know	Unsure / Don't Know	Unsure / Don't Know	Unsure / Don't Know	Unsure / Don't Know	Neutral	Unsure / Don't Know	Unsure / Don't Know	Unsure / Don't Know	Unsure / Don't Know	Unsure / Don't Know	Neutral	Unsure / Don't Know	Unsure / Don't Know	Unsure / Don't Know	Unsure / Don't Know	Unsure / Don't Know	Neutral	Unsure / Don't Know	Unsure / Don't Know	Unsure / Don't Know	Unsure / Don't Know	Unsure / Don't Know
2024-02-06 11:29:42	2024-02-06 12:17:18	100	2855	TRUE	2024-02-06 12:17:19		Yes, other:	Rarely	Yes, to rewrite text I've written to fix grammatical issues or awkward phrasings	Rarely	Yes, to shorten or summarize a long piece of text that I wrote,Yes, to rewrite my writing into a different style (e.g., more formal)	Rarely	Yes, other:	Very Rarely	No, I don't use LLMs for data generation	Never	No, I don't use LLMs for data cleaning, analysis, or reporting	Never		Slightly useful	Slightly useful	Slightly useful	Not at all useful	I have not use LLMs for this type of activity	I have not use LLMs for this type of activity	Very Risky	Slightly Risky	Moderately Risky	Very Risky	Extremely Risky	Extremely Risky	Acceptable	Acceptable	Acceptable	Unsure / Don't Know	Unsure / Don't Know	Unsure / Don't Know	Neutral	Neutral	Neutral	Uncomfortable	Uncomfortable	Uncomfortable	Neutral	Neutral	Neutral	Uncomfortable	Uncomfortable	Uncomfortable
2023-11-15 9:51:23	2023-11-15 10:25:11	100	2028	TRUE	2023-11-15 10:25:12		Yes, to discover papers to read,Yes, to discover important topics or threads of research for literature review,Yes, to generate summaries or explanations of papers or technical terms in papers,Yes, to ask broad questions of the field such as current trends or important findings	Frequently	Yes, to look up synonyms when I'm writing papers,Yes, to rewrite text I've written to fix grammatical issues or awkward phrasings	Occasionally	Yes, other:	Very Rarely	Yes, to get inspiration for methods or approaches to use for a given problem	Very Rarely	No, I don't use LLMs for data generation	Never	No, I don't use LLMs for data cleaning, analysis, or reporting	Never		Very useful	Extremely useful	Moderately useful	Moderately useful	I have not use LLMs for this type of activity	I have not use LLMs for this type of activity	Very Risky	Moderately Risky	Very Risky	Very Risky	Extremely Risky	Moderately Risky	Acceptable	Somewhat Acceptable	Somewhat Unacceptable	Neutral	Unacceptable	Neutral	Comfortable	Comfortable	Neutral	Neutral	Neutral	Neutral	Comfortable	Comfortable	Neutral	Somewhat comfortable	Neutral	Neutral
2024-01-25 15:35:14	2024-01-25 15:41:19	100	365	TRUE	2024-01-25 15:41:20		No, I don't use LLMs for information seeking or reading	Never	Yes, to rewrite text I've written to fix grammatical issues or awkward phrasings	Occasionally	No, I don't use LLMs for directly writing text while I lead ideation	Never	No, I don't use LLMs for ideation and framing	Never	No, I don't use LLMs for data generation	Never	No, I don't use LLMs for data cleaning, analysis, or reporting	Never		Very useful	I have not use LLMs for this type of activity	I have not use LLMs for this type of activity	I have not use LLMs for this type of activity	I have not use LLMs for this type of activity	I have not use LLMs for this type of activity	Not at all Risky	Slightly Risky	Very Risky	Very Risky	Very Risky	Very Risky	Acceptable	Acceptable	Acceptable	Acceptable	Acceptable	Acceptable	Comfortable	Comfortable	Comfortable	Comfortable	Comfortable	Comfortable	Somewhat comfortable	Somewhat comfortable	Somewhat comfortable	Somewhat comfortable	Somewhat comfortable	Somewhat comfortable
2023-11-28 10:38:15	2023-11-28 10:52:12	100	836	TRUE	2023-11-28 10:52:13		Yes, to discover papers to read,Yes, to discover important topics or threads of research for literature review,Yes, to generate summaries or explanations of papers or technical terms in papers,Yes, to ask broad questions of the field such as current trends or important findings	Very Frequently	Yes, to look up synonyms when I'm writing papers,Yes, to rewrite text I've written to fix grammatical issues or awkward phrasings,Yes, to support paper formatting (e.g., LaTeX, formatting tables or formulas)	Frequently	No, I don't use LLMs for directly writing text while I lead ideation	Never	Yes, to brainstorm research topics or questions to work on,Yes, to come up with new ways to frame a paper, including titles and abstracts,Yes, to get inspiration for methods or approaches to use for a given problem	Occasionally	No, I don't use LLMs for data generation	Never	No, I don't use LLMs for data cleaning, analysis, or reporting	Never																										Comfortable	Comfortable	Neutral	Comfortable	Neutral	Neutral
2023-11-28 1:36:39	2023-11-28 2:11:14	100	2074	TRUE	2023-11-28 2:11:15		Yes, to discover papers to read,Yes, to discover important topics or threads of research for literature review,Yes, to generate summaries or explanations of papers or technical terms in papers,Yes, to ask broad questions of the field such as current trends or important findings,Yes, other:	Frequently	Yes, to look up synonyms when I'm writing papers,Yes, to rewrite text I've written to fix grammatical issues or awkward phrasings,Yes, to support paper formatting (e.g., LaTeX, formatting tables or formulas)	Frequently	Yes, to shorten or summarize a long piece of text that I wrote,Yes, to draft paragraphs from ideas or bullet points,Yes, to rewrite my writing into a different style (e.g., more formal)	Never	Yes, to brainstorm research topics or questions to work on,Yes, to come up with new ways to frame a paper, including titles and abstracts,Yes, to get inspiration for methods or approaches to use for a given problem	Frequently	No, I don't use LLMs for data generation	Never	No, I don't use LLMs for data cleaning, analysis, or reporting	Never		Extremely useful	Extremely useful	Slightly useful	Extremely useful	Extremely useful	I have not use LLMs for this type of activity	Slightly Risky	Not at all Risky	Very Risky	Slightly Risky	Unsure / Don't Know	Unsure / Don't Know	Acceptable	Acceptable	Acceptable	Acceptable	Somewhat Acceptable	Acceptable	Comfortable	Comfortable	Somewhat uncomfortable	Comfortable	Neutral	Neutral	Comfortable	Comfortable	Somewhat uncomfortable	Comfortable	Neutral	Neutral
2024-01-25 12:52:30	2024-01-25 13:01:34	100	543	TRUE	2024-01-25 13:01:34		Yes, to ask broad questions of the field such as current trends or important findings	Very Rarely	No, I don't use LLMs for editing support when I am writing	Never	No, I don't use LLMs for directly writing text while I lead ideation	Never	Yes, to brainstorm research topics or questions to work on,Yes, to get inspiration for methods or approaches to use for a given problem	Rarely	No, I don't use LLMs for data generation	Never	No, I don't use LLMs for data cleaning, analysis, or reporting	Never		Moderately useful	I have not use LLMs for this type of activity	I have not use LLMs for this type of activity	Moderately useful	I have not use LLMs for this type of activity	I have not use LLMs for this type of activity	Slightly Risky	Extremely Risky	Extremely Risky	Slightly Risky	Extremely Risky	Extremely Risky	Somewhat Acceptable	Somewhat Unacceptable	Unacceptable	Somewhat Acceptable	Unacceptable	Unacceptable	Uncomfortable	Uncomfortable	Uncomfortable	Uncomfortable	Uncomfortable	Uncomfortable	Uncomfortable	Uncomfortable	Uncomfortable	Uncomfortable	Uncomfortable	Uncomfortable
2023-11-28 8:55:05	2023-11-28 9:48:30	100	3205	TRUE	2023-11-28 9:48:31		Yes, to discover papers to read,Yes, to discover important topics or threads of research for literature review,Yes, to ask broad questions of the field such as current trends or important findings	Rarely	Yes, to rewrite text I've written to fix grammatical issues or awkward phrasings	Very Rarely	No, I don't use LLMs for directly writing text while I lead ideation	Never	No, I don't use LLMs for ideation and framing	Never	No, I don't use LLMs for data generation	Never	No, I don't use LLMs for data cleaning, analysis, or reporting	Never		Very useful	Very useful	I have not use LLMs for this type of activity	I have not use LLMs for this type of activity	I have not use LLMs for this type of activity	Not at all useful	Not at all Risky	Not at all Risky	Moderately Risky	Very Risky	Extremely Risky	Unsure / Don't Know	Acceptable	Acceptable	Neutral	Neutral	Unacceptable	Unsure / Don't Know	Comfortable	Comfortable	Unsure / Don't Know	Unsure / Don't Know	Unsure / Don't Know	Unsure / Don't Know	Comfortable	Comfortable	Unsure / Don't Know	Unsure / Don't Know	Unsure / Don't Know	Unsure / Don't Know
2023-11-15 5:19:02	2023-11-15 5:37:25	100	1102	TRUE	2023-11-15 5:37:26		Yes, to discover papers to read	Occasionally	No, I don't use LLMs for editing support when I am writing	Rarely	Yes, to draft paragraphs from ideas or bullet points	Very Rarely	Yes, to brainstorm research topics or questions to work on	Rarely	No, I don't use LLMs for data generation	Never	No, I don't use LLMs for data cleaning, analysis, or reporting	Never		Very useful	Slightly useful	Slightly useful	Very useful	I have not use LLMs for this type of activity	I have not use LLMs for this type of activity	Very Risky	Moderately Risky	Extremely Risky	Very Risky	Unsure / Don't Know	Unsure / Don't Know	Acceptable	Acceptable	Neutral	Acceptable	Unsure / Don't Know	Unsure / Don't Know	Comfortable	Somewhat comfortable	Somewhat uncomfortable	Comfortable	Unsure / Don't Know	Unsure / Don't Know	Comfortable	Comfortable	Somewhat comfortable	Comfortable	Unsure / Don't Know	Unsure / Don't Know
2023-11-28 15:41:17	2023-11-28 15:48:30	100	432	TRUE	2023-11-28 15:48:31		Yes, to discover papers to read,Yes, to discover important topics or threads of research for literature review,Yes, to generate summaries or explanations of papers or technical terms in papers,Yes, to ask broad questions of the field such as current trends or important findings	Frequently	Yes, to look up synonyms when I'm writing papers,Yes, to rewrite text I've written to fix grammatical issues or awkward phrasings,Yes, to support paper formatting (e.g., LaTeX, formatting tables or formulas)	Frequently	Yes, to shorten or summarize a long piece of text that I wrote,Yes, to draft paragraphs from ideas or bullet points,Yes, to rewrite my writing into a different style (e.g., more formal)	Frequently	Yes, to brainstorm research topics or questions to work on,Yes, to come up with new ways to frame a paper, including titles and abstracts,Yes, to get inspiration for methods or approaches to use for a given problem	Frequently	Yes, to generate synthetic interviews and survey responses,Yes, to automatically produce training labels given example data,Yes, to automatically produce both training examples and labels	Frequently	Yes, to clean and reformat datasets,Yes, to conduct statistical reporting of quantitative data,Yes, to conduct analysis and reporting of qualitative data (e.g., of participant interviews),Yes, to simulate human ratings of an existing dataset for evaluation (e.g., summarization quality)	Frequently		Very useful	Very useful	Very useful	Very useful	Very useful	Very useful	Moderately Risky	Moderately Risky	Slightly Risky	Slightly Risky	Slightly Risky	Slightly Risky	Neutral	Neutral	Somewhat Acceptable	Acceptable	Somewhat Acceptable	Acceptable	Comfortable	Unsure / Don't Know	Comfortable	Comfortable	Comfortable	Comfortable	Comfortable	Comfortable	Comfortable	Comfortable	Comfortable	Comfortable
2024-03-19 19:41:13	2024-03-19 20:05:57	100	1484	TRUE	2024-03-19 20:05:58		No, I don't use LLMs for information seeking or reading	Very Rarely	Yes, other:	Occasionally	No, I don't use LLMs for directly writing text while I lead ideation	Never	No, I don't use LLMs for ideation and framing	Never	No, I don't use LLMs for data generation	Never	No, I don't use LLMs for data cleaning, analysis, or reporting	Never		I have not use LLMs for this type of activity	I have not use LLMs for this type of activity	I have not use LLMs for this type of activity	I have not use LLMs for this type of activity	I have not use LLMs for this type of activity	I have not use LLMs for this type of activity	Unsure / Don't Know	Moderately Risky	Moderately Risky	Moderately Risky	Very Risky	Very Risky	Unsure / Don't Know	Neutral	Somewhat Unacceptable	Somewhat Unacceptable	Somewhat Unacceptable	Neutral	Unsure / Don't Know	Neutral	Somewhat uncomfortable	Somewhat uncomfortable	Somewhat uncomfortable	Neutral	Uncomfortable	Neutral	Uncomfortable	Uncomfortable	Uncomfortable	Somewhat uncomfortable
2024-01-25 12:54:35	2024-01-25 13:08:28	100	832	TRUE	2024-01-25 13:08:28		Yes, to discover papers to read,Yes, to generate summaries or explanations of papers or technical terms in papers,Yes, to ask broad questions of the field such as current trends or important findings	Frequently	Yes, to rewrite text I've written to fix grammatical issues or awkward phrasings	Rarely	Yes, to draft paragraphs from ideas or bullet points	Rarely	No, I don't use LLMs for ideation and framing	Never	No, I don't use LLMs for data generation	Never	Yes, to clean and reformat datasets,Yes, to conduct statistical reporting of quantitative data	Frequently		Very useful	Very useful	Moderately useful	I have not use LLMs for this type of activity	I have not use LLMs for this type of activity	Extremely useful	Not at all Risky	Slightly Risky	Moderately Risky	Moderately Risky	Very Risky	Slightly Risky	Acceptable	Acceptable	Somewhat Acceptable	Somewhat Acceptable	Neutral	Acceptable	Comfortable	Comfortable	Somewhat uncomfortable	Neutral	Neutral	Comfortable	Comfortable	Somewhat comfortable	Somewhat uncomfortable	Neutral	Neutral	Comfortable
2023-11-28 1:54:14	2023-11-28 2:06:31	100	737	TRUE	2023-11-28 2:06:32		Yes, to discover papers to read,Yes, to discover important topics or threads of research for literature review,Yes, to generate summaries or explanations of papers or technical terms in papers,Yes, to ask broad questions of the field such as current trends or important findings	Frequently	Yes, to look up synonyms when I'm writing papers,Yes, to rewrite text I've written to fix grammatical issues or awkward phrasings,Yes, to support paper formatting (e.g., LaTeX, formatting tables or formulas)	Frequently	Yes, to shorten or summarize a long piece of text that I wrote,Yes, to draft paragraphs from ideas or bullet points,Yes, to rewrite my writing into a different style (e.g., more formal)	Frequently	Yes, to brainstorm research topics or questions to work on,Yes, to come up with new ways to frame a paper, including titles and abstracts,Yes, to get inspiration for methods or approaches to use for a given problem	Frequently	Yes, to generate synthetic interviews and survey responses,Yes, to automatically produce training labels given example data,Yes, to automatically produce both training examples and labels	Frequently	Yes, to clean and reformat datasets,Yes, to conduct statistical reporting of quantitative data,Yes, to conduct analysis and reporting of qualitative data (e.g., of participant interviews),Yes, to simulate human ratings of an existing dataset for evaluation (e.g., summarization quality)	Frequently		Very useful	Very useful	Very useful	Very useful	Very useful	Very useful	Very Risky	Moderately Risky	Moderately Risky	Moderately Risky	Moderately Risky		Neutral	Neutral	Neutral	Neutral	Neutral	Neutral	Comfortable	Comfortable	Comfortable	Comfortable	Comfortable	Comfortable	Comfortable	Comfortable	Comfortable	Comfortable	Comfortable	Comfortable
2024-01-25 18:56:58	2024-01-25 19:11:42	100	883	TRUE	2024-01-25 19:11:42		Yes, to discover papers to read,Yes, to generate summaries or explanations of papers or technical terms in papers	Occasionally	Yes, to rewrite text I've written to fix grammatical issues or awkward phrasings	Very Rarely	No, I don't use LLMs for directly writing text while I lead ideation	Never	Yes, to brainstorm research topics or questions to work on	Rarely	No, I don't use LLMs for data generation	Never	No, I don't use LLMs for data cleaning, analysis, or reporting	Never		Very useful	Slightly useful	Slightly useful	Very useful	Not at all useful	Not at all useful	Very Risky	Moderately Risky	Very Risky	Moderately Risky	Extremely Risky	Very Risky	Acceptable	Somewhat Acceptable	Somewhat Acceptable	Somewhat Acceptable	Unacceptable	Somewhat Acceptable	Comfortable	Comfortable	Comfortable	Comfortable	Comfortable	Comfortable	Comfortable	Comfortable	Comfortable	Comfortable	Comfortable	Comfortable
2023-11-28 3:36:58	2023-11-28 3:47:40	100	641	TRUE	2023-11-28 3:47:41		No, I don't use LLMs for information seeking or reading	Never	No, I don't use LLMs for editing support when I am writing	Never	No, I don't use LLMs for directly writing text while I lead ideation	Never	No, I don't use LLMs for ideation and framing	Never	No, I don't use LLMs for data generation	Never	No, I don't use LLMs for data cleaning, analysis, or reporting	Never		I have not use LLMs for this type of activity	I have not use LLMs for this type of activity	I have not use LLMs for this type of activity	I have not use LLMs for this type of activity	I have not use LLMs for this type of activity	I have not use LLMs for this type of activity	Extremely Risky	Extremely Risky	Extremely Risky	Extremely Risky	Extremely Risky	Extremely Risky	Somewhat Acceptable	Somewhat Acceptable	Unacceptable	Unacceptable	Unacceptable	Unacceptable	Uncomfortable	Uncomfortable	Uncomfortable	Uncomfortable	Uncomfortable	Uncomfortable	Comfortable	Somewhat comfortable	Uncomfortable	Uncomfortable	Uncomfortable	Uncomfortable
2023-11-15 0:26:59	2023-11-15 0:52:49	100	1550	TRUE	2023-11-15 0:52:50		Yes, to discover important topics or threads of research for literature review,Yes, to generate summaries or explanations of papers or technical terms in papers	Occasionally	Yes, to rewrite text I've written to fix grammatical issues or awkward phrasings	Occasionally	Yes, to rewrite my writing into a different style (e.g., more formal)	Occasionally	Yes, to come up with new ways to frame a paper, including titles and abstracts	Occasionally	No, I don't use LLMs for data generation	Occasionally	Yes, to simulate human ratings of an existing dataset for evaluation (e.g., summarization quality)	Occasionally		Moderately useful	Moderately useful	Moderately useful	Very useful	I have not use LLMs for this type of activity	I have not use LLMs for this type of activity	Unsure / Don't Know	Not at all Risky	Very Risky	Not at all Risky	Very Risky	Extremely Risky	Acceptable	Acceptable	Somewhat Unacceptable	Acceptable	Unacceptable	Unacceptable	Comfortable	Comfortable	Uncomfortable	Comfortable	Uncomfortable	Uncomfortable	Comfortable	Comfortable	Uncomfortable	Comfortable	Uncomfortable	Uncomfortable
2024-01-25 14:21:22	2024-01-25 14:32:19	100	657	TRUE	2024-01-25 14:32:19		Yes, to discover papers to read,Yes, to discover important topics or threads of research for literature review,Yes, to generate summaries or explanations of papers or technical terms in papers,Yes, to ask broad questions of the field such as current trends or important findings	Very Frequently	Yes, to rewrite text I've written to fix grammatical issues or awkward phrasings,Yes, to support paper formatting (e.g., LaTeX, formatting tables or formulas)	Frequently	No, I don't use LLMs for directly writing text while I lead ideation	Never	Yes, to brainstorm research topics or questions to work on,Yes, to come up with new ways to frame a paper, including titles and abstracts	Occasionally	No, I don't use LLMs for data generation	Never	No, I don't use LLMs for data cleaning, analysis, or reporting	Never		Extremely useful	Extremely useful	Moderately useful	Slightly useful	Not at all useful	Very useful	Slightly Risky	Slightly Risky	Slightly Risky	Moderately Risky	Extremely Risky	Moderately Risky	Acceptable	Acceptable	Somewhat Unacceptable	Neutral	Unacceptable	Acceptable	Somewhat comfortable	Comfortable	Neutral	Somewhat uncomfortable	Uncomfortable	Comfortable	Somewhat comfortable	Comfortable	Somewhat uncomfortable	Somewhat uncomfortable	Uncomfortable	Comfortable
2023-12-04 9:15:10	2023-12-04 9:24:18	100	547	TRUE	2023-12-04 9:24:19		Yes, to discover papers to read,Yes, to generate summaries or explanations of papers or technical terms in papers,Yes, to ask broad questions of the field such as current trends or important findings	Occasionally	Yes, to rewrite text I've written to fix grammatical issues or awkward phrasings	Occasionally	Yes, to shorten or summarize a long piece of text that I wrote	Occasionally	No, I don't use LLMs for ideation and framing	Never	No, I don't use LLMs for data generation	Never	No, I don't use LLMs for data cleaning, analysis, or reporting	Never		Moderately useful	Moderately useful	Slightly useful	Slightly useful	Not at all useful	Not at all useful	Slightly Risky	Slightly Risky	Very Risky	Extremely Risky	Extremely Risky	Extremely Risky	Acceptable	Acceptable	Acceptable	Somewhat Acceptable	Somewhat Unacceptable	Somewhat Unacceptable	Comfortable	Comfortable	Neutral	Somewhat uncomfortable	Uncomfortable	Uncomfortable	Comfortable	Comfortable	Somewhat comfortable	Somewhat uncomfortable	Uncomfortable	Uncomfortable
2024-01-25 13:07:33	2024-01-25 13:19:49	100	735	TRUE	2024-01-25 13:19:50		Yes, to discover papers to read,Yes, to generate summaries or explanations of papers or technical terms in papers	Occasionally	No, I don't use LLMs for editing support when I am writing	Never	No, I don't use LLMs for directly writing text while I lead ideation	Never	No, I don't use LLMs for ideation and framing	Never	No, I don't use LLMs for data generation	Never	No, I don't use LLMs for data cleaning, analysis, or reporting	Never		Very useful	I have not use LLMs for this type of activity	I have not use LLMs for this type of activity	I have not use LLMs for this type of activity	I have not use LLMs for this type of activity	I have not use LLMs for this type of activity	Not at all Risky	Slightly Risky	Moderately Risky	Slightly Risky	Moderately Risky	Moderately Risky	Acceptable	Neutral	Somewhat Unacceptable	Somewhat Acceptable	Somewhat Acceptable	Somewhat Acceptable	Comfortable	Neutral	Somewhat uncomfortable	Somewhat uncomfortable	Neutral	Neutral	Comfortable	Somewhat uncomfortable	Uncomfortable	Somewhat uncomfortable	Somewhat uncomfortable	Somewhat uncomfortable
2023-12-01 7:38:48	2023-12-01 7:43:07	43	259	FALSE	2023-12-08 7:43:12		Yes, to discover important topics or threads of research for literature review,Yes, to generate summaries or explanations of papers or technical terms in papers	Frequently	Yes, to rewrite text I've written to fix grammatical issues or awkward phrasings	Frequently	No, I don't use LLMs for directly writing text while I lead ideation	Never	Yes, to come up with new ways to frame a paper, including titles and abstracts	Occasionally	Yes, to generate synthetic interviews and survey responses	Rarely	Yes, to clean and reformat datasets	Occasionally
2024-01-25 2:55:48	2024-01-25 3:01:18	100	330	TRUE	2024-01-25 3:01:19		Yes, to discover papers to read,Yes, to discover important topics or threads of research for literature review	Frequently	Yes, to support paper formatting (e.g., LaTeX, formatting tables or formulas)	Frequently	Yes, to rewrite my writing into a different style (e.g., more formal)	Frequently	Yes, to come up with new ways to frame a paper, including titles and abstracts,Yes, to get inspiration for methods or approaches to use for a given problem	Occasionally	Yes, to automatically produce both training examples and labels	Occasionally	Yes, to clean and reformat datasets,Yes, to conduct statistical reporting of quantitative data	Rarely		Slightly useful	Extremely useful	I have not use LLMs for this type of activity				Very Risky	Extremely Risky	Moderately Risky	Unsure / Don't Know			Neutral	Acceptable	Acceptable	Neutral	Acceptable	Somewhat Acceptable	Somewhat comfortable	Neutral	Neutral	Somewhat comfortable	Neutral	Somewhat comfortable	Neutral	Comfortable	Somewhat comfortable	Somewhat comfortable	Somewhat comfortable	Neutral
2023-11-28 4:17:07	2023-11-28 4:22:50	43	343	FALSE	2023-12-05 4:22:51		Yes, to discover papers to read,Yes, to discover important topics or threads of research for literature review	Occasionally	Yes, to support paper formatting (e.g., LaTeX, formatting tables or formulas)	Occasionally	Yes, to rewrite my writing into a different style (e.g., more formal)	Occasionally	Yes, to get inspiration for methods or approaches to use for a given problem	Occasionally	Yes, to automatically produce both training examples and labels	Occasionally	Yes, to conduct analysis and reporting of qualitative data (e.g., of participant interviews)	Occasionally
2023-11-15 10:36:54	2023-11-15 10:49:54	100	779	TRUE	2023-11-15 10:49:55		Yes, to ask broad questions of the field such as current trends or important findings	Rarely	Yes, to rewrite text I've written to fix grammatical issues or awkward phrasings	Very Rarely	Yes, to shorten or summarize a long piece of text that I wrote,Yes, to rewrite my writing into a different style (e.g., more formal)	Very Rarely	Yes, to brainstorm research topics or questions to work on,Yes, to get inspiration for methods or approaches to use for a given problem	Rarely	Yes, to generate synthetic interviews and survey responses	Very Rarely	No, I don't use LLMs for data cleaning, analysis, or reporting	Never		Extremely useful	Very useful	Slightly useful	Moderately useful	Not at all useful	I have not use LLMs for this type of activity	Very Risky	Moderately Risky	Extremely Risky	Slightly Risky	Extremely Risky	Extremely Risky	Acceptable	Acceptable	Neutral	Acceptable	Acceptable	Somewhat Acceptable	Comfortable	Comfortable	Comfortable	Comfortable	Comfortable	Comfortable	Comfortable	Somewhat comfortable	Somewhat uncomfortable	Comfortable	Somewhat comfortable	Comfortable
2023-11-28 5:38:59	2023-11-28 5:47:51	57	532	FALSE	2023-12-05 5:47:56		No, I don't use LLMs for information seeking or reading	Never	No, I don't use LLMs for editing support when I am writing	Never	No, I don't use LLMs for directly writing text while I lead ideation	Never	No, I don't use LLMs for ideation and framing	Never	No, I don't use LLMs for data generation	Never	No, I don't use LLMs for data cleaning, analysis, or reporting	Never		I have not use LLMs for this type of activity	I have not use LLMs for this type of activity	I have not use LLMs for this type of activity	I have not use LLMs for this type of activity	I have not use LLMs for this type of activity	I have not use LLMs for this type of activity	Unsure / Don't Know	Unsure / Don't Know	Unsure / Don't Know	Unsure / Don't Know	Unsure / Don't Know	Unsure / Don't Know	Neutral	Neutral	Neutral	Neutral	Neutral	Neutral	Neutral	Neutral	Neutral	Neutral	Neutral	Neutral	Unsure / Don't Know	Unsure / Don't Know	Unsure / Don't Know	Unsure / Don't Know	Unsure / Don't Know	Unsure / Don't Know
2023-11-29 6:38:52	2023-11-29 6:41:48	43	176	FALSE	2023-12-06 6:41:54		Yes, to discover papers to read,Yes, to discover important topics or threads of research for literature review,Yes, to generate summaries or explanations of papers or technical terms in papers,Yes, to ask broad questions of the field such as current trends or important findings	Frequently	No, I don't use LLMs for editing support when I am writing	Rarely	No, I don't use LLMs for directly writing text while I lead ideation	Very Rarely	Yes, to come up with new ways to frame a paper, including titles and abstracts	Rarely	No, I don't use LLMs for data generation	Never	No, I don't use LLMs for data cleaning, analysis, or reporting	Never
2023-11-28 12:48:40	2023-11-28 13:10:37	100	1317	TRUE	2023-11-28 13:10:38		Yes, to discover papers to read,Yes, to discover important topics or threads of research for literature review,Yes, to ask broad questions of the field such as current trends or important findings	Occasionally	Yes, to look up synonyms when I'm writing papers	Never	No, I don't use LLMs for directly writing text while I lead ideation	Never	No, I don't use LLMs for ideation and framing	Never	No, I don't use LLMs for data generation	Never	No, I don't use LLMs for data cleaning, analysis, or reporting	Never		Very useful	I have not use LLMs for this type of activity	Moderately useful	Slightly useful	I have not use LLMs for this type of activity	I have not use LLMs for this type of activity	Moderately Risky	Unsure / Don't Know	Very Risky	Unsure / Don't Know	Unsure / Don't Know	Unsure / Don't Know	Somewhat Acceptable	Neutral	Somewhat Unacceptable	Neutral	Unsure / Don't Know	Unsure / Don't Know	Comfortable	Uncomfortable	Uncomfortable	Neutral	Unsure / Don't Know	Unsure / Don't Know	Comfortable	Somewhat uncomfortable	Somewhat uncomfortable	Unsure / Don't Know	Unsure / Don't Know
2024-01-25 9:48:34	2024-01-25 9:59:55	100	681	TRUE	2024-01-25 9:59:56		No, I don't use LLMs for information seeking or reading	Never	Yes, other:	Never	No, I don't use LLMs for directly writing text while I lead ideation	Never	No, I don't use LLMs for ideation and framing	Never	No, I don't use LLMs for data generation	Never	No, I don't use LLMs for data cleaning, analysis, or reporting	Never		I have not use LLMs for this type of activity	Moderately useful	I have not use LLMs for this type of activity	I have not use LLMs for this type of activity	I have not use LLMs for this type of activity	I have not use LLMs for this type of activity	Extremely Risky	Slightly Risky	Extremely Risky	Extremely Risky	Slightly Risky	Moderately Risky	Somewhat Unacceptable	Somewhat Unacceptable	Unacceptable	Somewhat Unacceptable	Neutral	Somewhat Unacceptable	Somewhat comfortable	Neutral	Uncomfortable	Uncomfortable	Somewhat uncomfortable	Somewhat uncomfortable	Comfortable	Somewhat uncomfortable	Uncomfortable	Somewhat uncomfortable	Somewhat uncomfortable	Somewhat uncomfortable
2023-11-15 6:27:11	2023-11-15 6:36:06	100	534	TRUE	2023-11-15 6:36:07		Yes, to discover papers to read,Yes, to ask broad questions of the field such as current trends or important findings	Occasionally	Yes, to look up synonyms when I'm writing papers,Yes, to rewrite text I've written to fix grammatical issues or awkward phrasings	Occasionally	Yes, to rewrite my writing into a different style (e.g., more formal)	Never	No, I don't use LLMs for ideation and framing	Very Rarely	No, I don't use LLMs for data generation	Never	No, I don't use LLMs for data cleaning, analysis, or reporting	Never		Very useful	Very useful	Not at all useful	Moderately useful	Slightly useful	Slightly useful	Not at all Risky	Slightly Risky	Very Risky	Moderately Risky	Extremely Risky	Very Risky	Acceptable	Acceptable	Unacceptable	Neutral	Somewhat Unacceptable	Acceptable	Somewhat comfortable	Somewhat comfortable	Somewhat uncomfortable	Somewhat uncomfortable	Uncomfortable	Somewhat comfortable	Somewhat uncomfortable	Somewhat comfortable	Uncomfortable	Uncomfortable	Uncomfortable	Somewhat comfortable
2023-11-28 15:23:41	2023-11-28 15:39:15	100	933	TRUE	2023-11-28 15:39:16		Yes, to discover papers to read,Yes, to discover important topics or threads of research for literature review,Yes, to generate summaries or explanations of papers or technical terms in papers,Yes, to ask broad questions of the field such as current trends or important findings	Very Frequently	Yes, to look up synonyms when I'm writing papers,Yes, to rewrite text I've written to fix grammatical issues or awkward phrasings,Yes, to support paper formatting (e.g., LaTeX, formatting tables or formulas)	Very Frequently	Yes, to shorten or summarize a long piece of text that I wrote,Yes, to draft paragraphs from ideas or bullet points,Yes, to rewrite my writing into a different style (e.g., more formal)	Very Frequently	Yes, to brainstorm research topics or questions to work on,Yes, to come up with new ways to frame a paper, including titles and abstracts,Yes, to get inspiration for methods or approaches to use for a given problem	Very Frequently	Yes, to generate synthetic interviews and survey responses,Yes, to automatically produce training labels given example data,Yes, to automatically produce both training examples and labels	Very Frequently	Yes, to clean and reformat datasets,Yes, to conduct statistical reporting of quantitative data,Yes, to conduct analysis and reporting of qualitative data (e.g., of participant interviews),Yes, to simulate human ratings of an existing dataset for evaluation (e.g., summarization quality)	Very Frequently		Extremely useful	Extremely useful	Extremely useful	Extremely useful	Extremely useful	Extremely useful	Not at all Risky	Not at all Risky	Not at all Risky	Not at all Risky	Not at all Risky	Not at all Risky	Acceptable	Acceptable	Acceptable	Acceptable	Acceptable	Acceptable		Comfortable	Comfortable	Comfortable	Comfortable	Comfortable	Comfortable	Comfortable	Comfortable	Comfortable	Comfortable	Comfortable
2023-11-28 9:40:48	2023-11-28 9:50:15	100	567	TRUE	2023-11-28 9:50:16		Yes, to discover papers to read,Yes, to discover important topics or threads of research for literature review,Yes, to ask broad questions of the field such as current trends or important findings	Frequently	No, I don't use LLMs for editing support when I am writing	Occasionally	Yes, to draft paragraphs from ideas or bullet points	Never	Yes, to brainstorm research topics or questions to work on,Yes, to come up with new ways to frame a paper, including titles and abstracts,Yes, to get inspiration for methods or approaches to use for a given problem	Occasionally	No, I don't use LLMs for data generation	Very Rarely	No, I don't use LLMs for data cleaning, analysis, or reporting	Very Rarely		Extremely useful	Not at all useful	Not at all useful	Very useful	Not at all useful	Slightly useful	Moderately Risky	Very Risky	Extremely Risky	Slightly Risky	Extremely Risky	Extremely Risky	Acceptable	Neutral	Neutral	Acceptable	Somewhat Acceptable	Neutral	Comfortable	Comfortable	Somewhat uncomfortable	Comfortable	Somewhat uncomfortable	Neutral	Comfortable	Comfortable	Comfortable	Comfortable	Comfortable	Comfortable
[truncated: 452 more rows]
